# Supplementary material for: Synergy of redox-activity and hemilability in thioamidato cobalt(iii) complexes for the chemoselective reduction of nitroarenes to anilines: catalytic and mechanistic investigation
Source: Royal Society of Chemistry journal article supplement (doi:10.1039/d3dt02923a), 2023-12-21
Supplement: d3dt02923a1.pdf [file d3dt02923a1.pdf]

Electronic Supplementary Information

Synergy of redox-activity and hemilability in thioamidato cobalt(III) complexes  
for the chemoselective reduction of nitroarenes to anilines: catalytic and  
mechanistic investigation

Dimitra K. Gioftsidou,<sup>a</sup> Michael G. Kallitsakis,<sup>a</sup> Konstantina Kavaratzi,<sup>a</sup> Antonios G. Hatzidimitriou,<sup>a</sup>  
Michael A. Terzidis,<sup>b</sup> Ioannis N. Lykakis<sup>a,\*</sup> and Panagiotis A. Angaridis<sup>a,\*</sup>

<sup>a</sup> *Laboratory of Inorganic Chemistry, Department of Chemistry, Aristotle University of Thessaloniki,  
54124 Thessaloniki, Greece*

<sup>b</sup> *Laboratory of Organic Chemistry, Department of Chemistry, Aristotle University of Thessaloniki,  
54124 Thessaloniki, Greece*

<sup>c</sup> *Department of Nutrition Sciences and Dietetics, International Hellenic University, Sindos, 57400  
Thessaloniki, Greece*

## Table of Contents

|                                                                                                                                                |           |
|------------------------------------------------------------------------------------------------------------------------------------------------|-----------|
| <b>S1 EXPERIMENTAL</b> .....                                                                                                                   | <b>3</b>  |
| S1.1 General procedures and chemicals.....                                                                                                     | 3         |
| S1.2 Syntheses .....                                                                                                                           | 3         |
| S1.3 Instrumentation .....                                                                                                                     | 6         |
| S1.4 Single crystal X-ray diffraction analysis .....                                                                                           | 6         |
| S1.5 Catalytic reactions.....                                                                                                                  | 7         |
| <b>S2 RESULTS AND DISCUSSION</b> .....                                                                                                         | <b>8</b>  |
| S2.1 Single-crystal X-ray diffraction analysis .....                                                                                           | 8         |
| S2.2 <sup>1</sup> H and <sup>13</sup> C{H} NMR spectra of Co(III) complexes.....                                                               | 13        |
| S2.3 Catalytic reactions.....                                                                                                                  | 19        |
| S2.3.1 <sup>1</sup> H NMR spectra of catalytic reaction product 1b in the presence of complexes 1-8.....                                       | 20        |
| S2.3.2 <sup>1</sup> H and <sup>13</sup> C{H} NMR spectra of catalytic reaction products 1b-14b, 16b and 17c in the presence of complex 2 ..... | 28        |
| S2.4 Mechanistic studies.....                                                                                                                  | 45        |
| S2.4.1 High-resolution mass spectrometry .....                                                                                                 | 45        |
| S2.4.2 UV-vis absorption spectroscopy .....                                                                                                    | 48        |
| S2.4.3 Cyclic voltammetry .....                                                                                                                | 49        |
| S2.4.4 Gas chromatography analysis.....                                                                                                        | 51        |
| <b>REFERENCES</b> .....                                                                                                                        | <b>52</b> |

## S1 EXPERIMENTAL

### S1.1 General procedures and chemicals

All manipulations were carried out under atmospheric conditions. Solvents were purified according to established methods and allowed to stand over molecular sieves for 24 h. 2-mercaptopyrimidine (pymtH), 4,6-dimethyl-2-pyrimidinethiol (dmp2SH), 4,6-diamino-2-pyrimidinethiol (damp2SH), 2-mercaptopyridine (2-mpyH), triphenylphosphine (PPh<sub>3</sub>), 1,2-bis(diphenylphosphino)ethane (dppe), pyridine (py), diethylamine ((CH<sub>3</sub>CH<sub>2</sub>)<sub>2</sub>NH), sodium methoxide (CH<sub>3</sub>ONa), ammonium hexafluorophosphate (NH<sub>4</sub>PF<sub>6</sub>), tetraethylammonium hexafluorophosphate ((CH<sub>3</sub>CH<sub>2</sub>)<sub>4</sub>NPF<sub>6</sub>), [CoCl<sub>2</sub>·6H<sub>2</sub>O] and [Co(acac)<sub>3</sub>], as well as methylhydrazine (CH<sub>3</sub>NHNH<sub>2</sub>), nitroarenes, nitrosobenzenes, nitroalkane, nitroalkene were obtained from commercial sources and used without any further purification.

### S1.2 Syntheses

**General synthesis of [Co(L<sup>NS</sup>)<sub>3</sub>] (1-4 and 6).** CoCl<sub>2</sub>·6H<sub>2</sub>O (0.119 g, 0.5 mmol) was dissolved in 15 mL of CH<sub>3</sub>OH. Alongside, to a methanol solution (15 mL) of the corresponding heterocyclic thioamide L<sup>NHS</sup> (1.5 mmol), (CH<sub>3</sub>CH<sub>2</sub>)<sub>2</sub>NH (1.5 mmol) was added dropwise. The resulting solution of the deprotonated heterocyclic thioamidate (L<sup>NS-</sup>) was stirred at room temperature for 30 min and then it was added slowly to the Co-containing solution. The reaction mixture was stirred at 60-70°C for 3 h. After filtration, the dark brown filtrate was set aside to evaporate slowly at room temperature and, over a period of a few days, crystals of **1-4** and **6** were formed.

**[Co(pymt)<sub>3</sub>] (1).** Dark brown crystals. Yield (based on Co): 58%. Anal. for C<sub>14</sub>H<sub>12</sub>CoN<sub>7</sub>S<sub>3</sub>: Calcd (%) C, 38.80; H, 2.79; N, 22.62. Found (%) C, 38.90; H, 2.95; N, 22.75. FTIR (KBr, cm<sup>-1</sup>): 3446(w br), 1560(m), 1544(m), 1426(w), 1369(s), 1241(w br), 1201(w), 1168(w), 1095(w), 1061(w), 1010(w), 797(w br), 753(m), 665(w), 4809(w br). UV-vis (CH<sub>3</sub>OH), λ<sub>max</sub>/nm (ε/M<sup>-1</sup> cm<sup>-1</sup>): 315 (7568), 630 (119). <sup>1</sup>H NMR (500 MHz, CDCl<sub>3</sub>): δ (ppm) 8.61 (s, 1 H), 8.41-8.37 (d, 4 H), 7.43 (s, 2 H), 7.11 (s, 1 H), 6.79 (s, 1 H). <sup>13</sup>C{<sup>1</sup>H} NMR (125 MHz, CDCl<sub>3</sub>): δ (ppm) 187.42, 186.49, 185.38, 169.74, 158.55, 158.31, 157.94, 157.48, 155.36.

**[Co(tfmp2S)<sub>3</sub>] (2).** Recrystallization from CH<sub>2</sub>Cl<sub>2</sub>/hexane. Brown crystals. Yield (based on Co): 70%. Anal. for C<sub>15</sub>H<sub>6</sub>CoF<sub>9</sub>N<sub>6</sub>S<sub>3</sub>·0.16CH<sub>2</sub>Cl<sub>2</sub>: Calcd. (%) C, 29.84; H, 1.05; N, 13.77. Found (%) C, 30.07; H, 1.26; N, 13.53. FTIR (KBr, cm<sup>-1</sup>): 3415(m br), 1637(w), 1617(w), 1572(s), 1555(s), 1421(m), 1364(s), 1328(s), 1194(s br), 1150(s br), 1112(s), 1018(w), 1010(w), 834(m), 831(m), 736(m), 688(m), 618(w br), 525(w), 485(w). UV-vis (CH<sub>3</sub>OH), λ<sub>max</sub>/nm (ε/M<sup>-1</sup> cm<sup>-1</sup>): 323 (15469), 640 (163). <sup>1</sup>H NMR (500 MHz, CDCl<sub>3</sub>): δ (ppm) 8.64 (s, 1 H), 8.60 (s, 1 H), 7.74 (s, 1 H), 7.22 (s, 1H), 7.09 (s, 1 H), 6.98 (s, 1 H). <sup>13</sup>C{<sup>1</sup>H} NMR (125 MHz, CDCl<sub>3</sub>): δ (ppm) 187.3, 185.6, 185.0, 161.0, 159.9, 158.0, 157.8, 157.5, 157.1, 119.09, 119.06, 119.0, 111.0, 110.7, 109.9.

**[Co(dmp2S)<sub>3</sub>] (3).** Dark green crystals. Yield (based on Co): 65%. Anal. for C<sub>19</sub>H<sub>22.5</sub>CoN<sub>6.5</sub>S<sub>3</sub>: Calcd. (%) C, 46.41; H, 4.67; N, 18.94. Found (%) C, 46.51; H, 4.59; N, 18.86. FTIR (KBr, cm<sup>-1</sup>): 3480(wbr), 1580(s), 1525(s), 1430(sbr), 1353(w), 1338(m), 1267(s), 1194(w), 1174(m), 1027(w), 1001(w), 925(m), 889(w), 844(m), 578(mbr). UV-vis (CH<sub>3</sub>OH), λ<sub>max</sub>/nm (ε/M<sup>-1</sup> cm<sup>-1</sup>): 322 (12324), 614 (94). <sup>1</sup>H NMR (500 MHz, CDCl<sub>3</sub>): δ (ppm) 6.42 (s, 3 H), 2.42 (s, 9 H), 1.78 (s, 9 H). <sup>13</sup>C{<sup>1</sup>H} NMR (125 MHz, CDCl<sub>3</sub>): δ (ppm) 185.83, 185.79, 185.75, 168.35, 166.77, 115.18, 24.07, 19.97.

**[Co(damp2S)<sub>3</sub>] (4).** Brown crystals. Yield (based on Co): 68%. Anal. for C<sub>13.3</sub>H<sub>20</sub>CoN<sub>12</sub>O<sub>1.4</sub>S<sub>3</sub>: Calcd. (%) C, 31.14; H, 4.70; N, 29.05. Found (%) C, 31.26; H, 4.58; N, 29.15. FTIR (KBr, cm<sup>-1</sup>): 3301(m br), 3138(m br), 1624(s), 1573(s), 1533(s), 1470(s), 1319(m), 1276(m), 1253(m br), 1043(w), 995(w), 937(w), 795(w), 589(w). UV-vis (CH<sub>3</sub>OH), λ<sub>max</sub>/nm (ε/M<sup>-1</sup> cm<sup>-1</sup>): 309 (10680), 640 (189). NMR data couldn't be obtained due to its very low solubility.

**[Co(2-mpy)<sub>3</sub>] (6).** Recrystallization from CH<sub>2</sub>Cl<sub>2</sub>/hexane. Brown crystals. Yield (based on Co): 85%. Anal. for C<sub>15</sub>H<sub>12</sub>CoN<sub>3</sub>S<sub>3</sub>: Calcd. (%) C, 46.27; H, 3.11; N, 10.79. Found (%) C, 46.35; H, 3.19; N, 10.86. FTIR (KBr, cm<sup>-1</sup>): 1576(m), 1552(w), 1439(m), 1422(m), 1254(m), 1138(m), 1087(w), 1025(w), 750(m), 732(m), 658(w), 495(w). UV-vis (CH<sub>3</sub>OH), λ<sub>max</sub>/nm (ε/M<sup>-1</sup> cm<sup>-1</sup>): 322 (10624), 650 (122). <sup>1</sup>H NMR (500 MHz, CDCl<sub>3</sub>): δ (ppm) 9.57 (s, 1 H), 8.28 (s, 1 H), 7.50-7.47 (t, 1 H), 7.42-7.38 (t, 2 H), 7.08 (s, 1 H), 6.83-6.78 (m, 4 H), 6.69-6.67 (t, 1 H), 6.60-6.57 (t, 1 H). <sup>13</sup>C{<sup>1</sup>H} NMR (125 MHz, CD<sub>3</sub>COCD<sub>3</sub>): δ (ppm) 178.63, 178.50, 178.44, 150.32, 149.62, 148.40, 137.29, 136.83, 136.63, 136.00, 135.74, 125.80, 124.47, 117.49, 116.72.

**[Co(pymt)<sub>3</sub>(PPh<sub>3</sub>)] (5).** 0.119 g (0.5 mmol) of CoCl<sub>2</sub>·6H<sub>2</sub>O was dissolved in 20 mL of CH<sub>3</sub>OH. An amount of 0.113 g (1 mmol) of pymtH was dissolved in 10 mL of CH<sub>3</sub>OH and then 4.2 mL of KOH 0.24 M (1 mmol) was added. The dark yellow solution was stirred for 20 min and then 0.265 g (1.0 mmol) of PPh<sub>3</sub> added. The resulting solution was added to the Co-containing solution. The reaction mixture was stirred at 50°C for 2 h and then it was filtered. The brown filtrate was allowed to evaporate slowly leading to the precipitation of dark brown crystals of compound **5** within 7 days. Yield (based on Co): 82%. Anal. for C<sub>30</sub>H<sub>24</sub>CoN<sub>6</sub>PS<sub>3</sub>: Calcd. (%) C, 55.04; H, 3.70; N, 12.84. Found (%) C, 55.14; H, 3.82; N, 12.72. FTIR (KBr, cm<sup>-1</sup>): 1558(w), 1542(w), 1430(v w), 1378(m), 1253(v w), 1094(v w), 755(w), 699(w), 500(v w). UV-vis (CH<sub>3</sub>OH), λ<sub>max</sub>/nm (ε/M<sup>-1</sup> cm<sup>-1</sup>): 306 (2927), 640 (100). <sup>1</sup>H NMR (500 MHz, CDCl<sub>3</sub>): δ (ppm) 8.81-8.77 (d, 1 H), 8.62 (s, 1 H), 7.77 (t br, 6 H), 7.67 (t br, 2 H), 7.54-7.53 (t, 1 H), 7.47 (t, 3 H), 7.37 (m, 3 H), 7.28 (m br, 5 H), 7.16 (s br, 1 H), 6.84 (s br, 1 H). <sup>13</sup>C{<sup>1</sup>H} NMR (125 MHz, CDCl<sub>3</sub>): δ (ppm) 179.93, 179.81, 171.80, 158.38, 155.32, 153.13, 134.01, 133.54, 133.47, 131.94, 131.59, 128.45, 128.25, 128.21, 128.17, 128.13, 116.32.

**[Co(2-mpy)<sub>2</sub>(dppe)]PF<sub>6</sub> (7).** 0.119 g of CoCl<sub>2</sub>·6H<sub>2</sub>O (0.5 mmol) was added in 30 mL of CH<sub>3</sub>OH. 0.111 g (1 mmol) 2-mpyH and 0.199 g dppe (0.5 mmol) were added in 15 mL CH<sub>3</sub>OH. After stirring 0.07 mL of (CH<sub>3</sub>CH<sub>2</sub>)<sub>2</sub>NH (0.7 mmol) was added. Then the dark yellow solution was added to the Co-containing solution and the total solution was stirred for 1 h at 60 °C. After cooling, the solution was filtered and 0.138 g of NH<sub>4</sub>PF<sub>6</sub> (0.5 mmol) was added to the brown filtrate. The total solution was stirred for 30 min and then the brown-green filtrate was allowed to evaporate slowly. After 7 days, brown-greenish crystals were obtained. Yield (based on Co): 80%. Anal. for C<sub>36</sub>H<sub>32</sub>CoF<sub>6</sub>N<sub>2</sub>O<sub>0.25</sub>P<sub>3</sub>S<sub>2</sub>: Calcd. (%) C, 52.95; H, 4.79; N, 3.17. Found (%) C, 52.80; H, 4.84; N, 3.25. FTIR (KBr, cm<sup>-1</sup>): 3439(m br), 1631(w), 1581(m), 1551(w), 1485(w), 1435(m br), 1425(m), 1260(m), 1190(w), 1137(m), 1094(m), 1024(w), 999(w), 840(s), 747(m br), 732(m br), 688(m br), 591(w), 557(m), 533(m), 492(w). UV-vis (CH<sub>3</sub>OH), λ<sub>max</sub>/nm (ε/M<sup>-1</sup> cm<sup>-1</sup>): 315 (15741), 610 (185). <sup>1</sup>H NMR (500 MHz, CD<sub>3</sub>CN): δ (ppm) 8.39-8.38 (d, 2 H), 7.69-7.63 (m, 6 H), 7.60-7.58 (t, 4 H), 7.45-7.43 (t, 2 H), 7.39-7.38 (t, 2 H), 7.18-7.16 (m, 8 H), 7.00-6.99 (t, 2 H), 6.42-6.40 (d, 2 H), 1.32-1.29 (t, 4 H). <sup>13</sup>C{<sup>1</sup>H} NMR (126 MHz, CD<sub>3</sub>CN): δ (ppm) 175.21, 147.50, 137.88, 131.78, 129.23, 128.09, 125.57, 119.62, 23.03.

**[Co(2-mpy)<sub>2</sub>(py)<sub>2</sub>]PF<sub>6</sub> (8).** 0.238 g of CoCl<sub>2</sub>·6H<sub>2</sub>O (1 mmol) was added in 40 mL CH<sub>3</sub>OH. 0.222 g (2 mmol) of 2-mpyH and 0.32 mL (1 mmol) of py dissolved in 10 mL of CH<sub>3</sub>OH and then was added 0.068 g of CH<sub>3</sub>ONa (1.25 mmol). After 15 min the deprotonation solution was added to the Co-containing solution and the total dark brown solution was stirred for 15 min. Filtration was followed and 0.275 g (CH<sub>3</sub>CH<sub>2</sub>)<sub>4</sub>NPF<sub>6</sub> (1 mmol) dissolved in 5 mL CH<sub>3</sub>OH. The total solution was stirred and the brown filtrate was allowed to crystallize by slow evaporation at room temperature. After a week

brown crystal were received. Yield (based on Co): 77%. Anal. for  $C_{20}H_{18}CoF_6N_4PS_2$ : Calcd. (%) C, 44.09; H, 4.18; N, 8.94. Found (%) C, 44.18; H, 4.23; N, 8.89. FTIR (KBr,  $cm^{-1}$ ): 1606(w br), 1579(m br), 1554(w), 1488(w), 1443(m), 1422(m), 1358(w), 1266(m), 1220(w), 1154(w), 1140(m), 1092(w), 1070(m), 877(w), 840(s), 758(m), 734(w), 697(m), 557(m), 468(w). UV-vis ( $CH_3OH$ ),  $\lambda_{max}/nm$  ( $\epsilon/M^{-1}cm^{-1}$ ): 323 (16241), 650 (214).  $^1H$  NMR (500 MHz,  $CDCl_3$ ):  $\delta$  (ppm) 8.27 (s br, 4 H), 7.50-7.47 (t, 2 H), 7.40 (t br, 2 H), 7.07 (s br, 2 H), 6.83-6.78 (q, 6 H), 6.68 (t, 1 H), 6.58 (t, 1 H).  $^{13}C\{^1H\}$  NMR (126 MHz,  $CD_3COCD_3$ ):  $\delta$  (ppm) 178.75, 178.26, 150.21, 149.61, 147.56, 137.30, 136.63, 136.00, 125.51, 125.39, 125.14, 117.61, 116.99.

### S1.3 Instrumentation

Elemental analyses were obtained on a PerkinElmer 240B elemental microanalyzer. Infra-red spectra were recorded on a Nicolet FT-IR 6700 spectrophotometer as KBr discs in the region of 4000-400  $\text{cm}^{-1}$ . UV-vis electronic absorption spectra were obtained on a Shimadzu 160A spectrophotometer as  $1.0 \times 10^{-3}$  M and  $1.0 \times 10^{-4}$  M solutions in  $\text{CH}_3\text{OH}$ . Cyclic voltammetry measurements were conducted on an Autolab electrochemical analyzer, using a carbon working electrode, a platinum counter electrode, and an Ag/AgCl electrode saturated with a KCl reference electrode in 8 mL of  $\text{CH}_3\text{OH}$  or  $\text{CH}_3\text{CN}$  solutions with 0.1 M  $\text{Bu}_4\text{NBF}_4$  as supporting electrolyte, and a scan rate of  $0.1 \text{ V s}^{-1}$ . Argon was used to purge all samples. In the acetic acid concentration dependence study, a stock solution of  $\text{CH}_3\text{COOH}$  (8.56 M) was prepared in  $\text{CH}_3\text{CN}$ . To a stirred and degassed 1.0 mM catalyst solution, 4-20 mM of acid stock solution was added and purged with argon for 120 s before performing cyclic voltammetry.  $^1\text{H}$  and  $^{13}\text{C}\{^1\text{H}\}$  NMR spectra were recorded in  $\text{CDCl}_3$ ,  $\text{CD}_3\text{CN}$ ,  $\text{CD}_3\text{OD}$  and  $\text{CD}_3\text{COCD}_3$  solutions on an Agilent 500 MHz spectrometer. Chemical shifts were reported as  $\delta$  values using the solvent as internal standard.

### S1.4 Single crystal X-ray diffraction analysis

Single crystals of all compounds, suitable for X-ray diffraction analysis, were mounted on thin glass fibers with the aid of an epoxy resin. X-ray diffraction data were collected on a Bruker Apex II CCD area-detector diffractometer, equipped with a Mo Ka ( $\lambda = 0.71070 \text{ \AA}$ ) sealed tube source, at 295 K, using the  $\phi$  and  $\omega$  scans technique. The program Apex2 (Bruker AXS, 2006) was used in data collection, cell refinement, and data reduction.<sup>1</sup> Structures were solved and refined with full-matrix least-squares using the program Crystals.<sup>2</sup> Anisotropic displacement parameters were applied to all non-hydrogen atoms, while hydrogen atoms were generated geometrically and refined using a riding model. Details of crystal data and structure refinement parameters are shown in Table S1. Plots of the molecular structures of all compounds were obtained by using Mercury software.<sup>3</sup>

### S1.5 Catalytic reactions

**Evaluation of catalytic activity of complexes 1-8.** To a sealed tube containing 4-nitrotoluene (0.2 mmol) and 1 mL CH<sub>3</sub>OH were added 5 equiv of CH<sub>3</sub>NHNH<sub>2</sub> (1 mmol) and the respective catalyst **1-8** (1-2 mol %). The reaction was heated at 70 °C for 4 h. The reaction was monitored by TLC, and after completion the solvent was evaporated under vacuum, small amount of ethyl acetate was added, and the slurry was filtered under pressure through a short pad of silica gel to withhold the catalyst. The filtrate was evaporated under vacuum to afford the corresponding amine in almost pure form.

**Application of catalytic reaction to substrates 1a-17a.** Analogous reactions, under similar experimental conditions, were conducted for substrates **1a-17a** using complex **2** as catalyst. Spectroscopic data (<sup>1</sup>H and <sup>13</sup>C{<sup>1</sup>H} NMR) of the products of the reactions are in agreement with those reported in the literature.<sup>4,5,6</sup>

## S2 RESULTS AND DISCUSSION

### S2.1 Single-crystal X-ray diffraction analysis

Table S1. Crystal data, data collection and refinement parameters for complexes **1**, **3**, **4**, **5**, **7** and **8**.

|                                                                                                | <b>1</b> ·2CH <sub>3</sub> CN                                         | <b>3</b> ·0.5CH <sub>3</sub> CN                                       | <b>4</b> ·1.25CH <sub>3</sub> OH                                      |
|------------------------------------------------------------------------------------------------|-----------------------------------------------------------------------|-----------------------------------------------------------------------|-----------------------------------------------------------------------|
| CCDC Deposition Number                                                                         | 1995929                                                               | 1995931                                                               | 1995932                                                               |
| Chemical formula                                                                               | C <sub>12</sub> H <sub>9</sub> CoN <sub>6</sub> S <sub>3</sub>        | C <sub>18</sub> H <sub>21</sub> CoN <sub>6</sub> S <sub>3</sub>       | C <sub>12</sub> H <sub>15</sub> CoN <sub>12</sub> S <sub>3</sub>      |
| Formula weight                                                                                 | 433.43                                                                | 497.06                                                                | 522.52                                                                |
| Crystal system                                                                                 | Orthorhombic                                                          | Orthorhombic                                                          | Monoclinic                                                            |
| Space group                                                                                    | <i>Pbcb</i>                                                           | <i>Pna</i> <sub>21</sub>                                              | <i>P2</i> <sub>1</sub> / <i>c</i>                                     |
| Temperature (K)                                                                                | 295                                                                   | 295                                                                   | 295                                                                   |
| Unit cell parameters                                                                           |                                                                       |                                                                       |                                                                       |
| a (Å)                                                                                          | 10.3110 (17)                                                          | 15.4562 (8)                                                           | 10.7282 (13)                                                          |
| b (Å)                                                                                          | 12.3024 (19)                                                          | 19.4479 (14)                                                          | 29.457 (3)                                                            |
| c (Å)                                                                                          | 28.363 (6)                                                            | 8.1889 (4)                                                            | 8.1158 (8)                                                            |
| Volume (Å <sup>3</sup> )                                                                       | 3597.8 (11)                                                           | 2461.5 (2)                                                            | 2503.1 (5)                                                            |
| Z                                                                                              | 8                                                                     | 4                                                                     | 4                                                                     |
| Radiation type, λ (Å)                                                                          | Mo Kα                                                                 | Mo Kα                                                                 | Mo Kα                                                                 |
| Absorption coefficient (mm <sup>-1</sup> )                                                     | 1.31                                                                  | 0.97                                                                  | 0.97                                                                  |
| Crystal size (mm)                                                                              | 0.14 × 0.12 × 0.07                                                    | 0.19 × 0.17 × 0.13                                                    | 0.20 × 0.19 × 0.14                                                    |
| Diffractionmeter                                                                               | Bruker Kappa Apex2                                                    | Bruker Kappa Apex2                                                    | Bruker Kappa Apex2                                                    |
| Absorption correction                                                                          | Numerical<br>Analytical Absorption<br>(De Meulenaer &<br>Tomba, 1965) | Numerical<br>Analytical Absorption<br>(De Meulenaer &<br>Tomba, 1965) | Numerical<br>Analytical Absorption<br>(De Meulenaer &<br>Tomba, 1965) |
| <i>T</i> <sub>min</sub> , <i>T</i> <sub>max</sub>                                              | 0.85, 0.91                                                            | 0.85, 0.88                                                            |                                                                       |
| Number of measured,<br>independent and observed<br>[  <i>I</i> > 2.0σ( <i>I</i> )] reflections | 26550, 3452, 2906                                                     | 15406, 4989, 3258                                                     | 41557, 4814, 3903                                                     |
| R <sub>int</sub>                                                                               | 0.028                                                                 | 0.022                                                                 | 0.040                                                                 |
| (sin θ/λ) <sub>max</sub> (Å <sup>-1</sup> )                                                    | 0.612                                                                 | 0.626                                                                 | 0.617                                                                 |
| R[F <sup>2</sup> > 2σ(F <sup>2</sup> )], wR(F <sup>2</sup> ), S                                | 0.047, 0.070, 1.00                                                    | 0.023, 0.049, 1.00                                                    | 0.045, 0.070, 1.00                                                    |
| No. of reflections                                                                             | 2906                                                                  | 3258                                                                  | 3903                                                                  |
| No. of parameters                                                                              | 228                                                                   | 266                                                                   | 277                                                                   |
| Δρ <sub>max</sub> , Δρ <sub>min</sub> (e Å <sup>-3</sup> )                                     | 0.65, -0.34                                                           | 0.24, -0.22                                                           | 0.39, -0.38                                                           |

(continued)



(continued)

|                                                                                               | 5                                                                | 7·0.25H <sub>2</sub> O                                                                                          | 8                                                                               |
|-----------------------------------------------------------------------------------------------|------------------------------------------------------------------|-----------------------------------------------------------------------------------------------------------------|---------------------------------------------------------------------------------|
| CCDC Deposition Number                                                                        | 1995933                                                          | 1995934                                                                                                         | 1995935                                                                         |
| Chemical formula                                                                              | C <sub>30</sub> H <sub>24</sub> CoN <sub>6</sub> PS <sub>3</sub> | C <sub>36</sub> H <sub>32</sub> CoF <sub>6</sub> N <sub>2</sub> O <sub>0.25</sub> P <sub>3</sub> S <sub>2</sub> | C <sub>20</sub> H <sub>18</sub> CoF <sub>6</sub> N <sub>4</sub> PS <sub>2</sub> |
| Formula weight                                                                                | 654.67                                                           | 826.64                                                                                                          | 582.42                                                                          |
| Crystal system                                                                                | Triclinic                                                        | Orthorhombic                                                                                                    | Monoclinic                                                                      |
| Space group                                                                                   | <i>P</i> -1                                                      | <i>P</i> 2 <sub>1</sub> 2 <sub>1</sub> 2 <sub>1</sub>                                                           | <i>P</i> 2 <sub>1</sub> / <i>c</i>                                              |
| Temperature (K)                                                                               | 295                                                              | 295                                                                                                             | 295                                                                             |
| Unit cell parameters                                                                          |                                                                  |                                                                                                                 |                                                                                 |
| a (Å)                                                                                         | 10.1905 (15)                                                     | 12.6502 (5)                                                                                                     | 8.7104 (12)                                                                     |
| b (Å)                                                                                         | 11.2851 (16)                                                     | 13.2027 (5)                                                                                                     | 20.042 (3)                                                                      |
| c (Å)                                                                                         | 14.0183 (19)                                                     | 22.5410 (8)                                                                                                     | 13.7941 (17)                                                                    |
| Volume (Å <sup>3</sup> )                                                                      | 1452.2 (6)                                                       | 3764.7 (2)                                                                                                      | 2408.0 (6)                                                                      |
| Z                                                                                             | 2                                                                | 4                                                                                                               | 4                                                                               |
| Radiation type, λ (Å)                                                                         | Mo Kα                                                            | Mo Kα                                                                                                           | Mo Kα                                                                           |
| Absorption coefficient (mm <sup>-1</sup> )                                                    | 0.89                                                             | 0.75                                                                                                            | 1.01                                                                            |
| Crystal size (mm)                                                                             | 0.23 × 0.16 × 0.07                                               | 0.20 × 0.17 × 0.11                                                                                              | 0.26 × 0.19 × 0.17                                                              |
| Diffractometer                                                                                | Bruker Kappa Apex2<br>Numerical                                  | Bruker Kappa Apex2<br>Numerical                                                                                 | Bruker Kappa Apex2<br>Numerical                                                 |
| Absorption correction                                                                         | Analytical Absorption<br>(De Meulenaer &<br>Tomba, 1965)         | Analytical Absorption (De<br>Meulenaer & Tompa,<br>1965)                                                        | Analytical Absorption<br>(De Meulenaer &<br>Tomba, 1965)                        |
| <i>T</i> <sub>min</sub> , <i>T</i> <sub>max</sub>                                             | 0.87, 0.94                                                       | 0.88, 0.92                                                                                                      | 0.82, 0.84                                                                      |
| Number of measured,<br>independent and observed<br>[ <i>I</i> > 2.0σ( <i>I</i> )] reflections | 37275, 5409, 3985                                                | 24737, 7688, 5868                                                                                               | 43635, 5311, 4513                                                               |
| R <sub>int</sub>                                                                              | 0.052                                                            | 0.016                                                                                                           | 0.028                                                                           |
| (sin θ/λ) <sub>max</sub> (Å <sup>-1</sup> )                                                   | 0.617                                                            | 0.626                                                                                                           | 0.643                                                                           |
| R[F <sup>2</sup> > 2σ(F <sup>2</sup> )], wR(F <sup>2</sup> ), S                               | 0.040, 0.072, 1.00                                               | 0.031, 0.052, 1.00                                                                                              | 0.066, 0.131, 1.00                                                              |
| No. of reflections                                                                            | 3985                                                             | 5868                                                                                                            | 4513                                                                            |
| No. of parameters                                                                             | 370                                                              | 456                                                                                                             | 301                                                                             |
| Δρ <sub>max</sub> , Δρ <sub>min</sub> (e Å <sup>-3</sup> )                                    | 0.40, -0.36                                                      | 0.33, -0.72                                                                                                     | 1.12, -0.67                                                                     |

Table S2. Bond distances (Å) and angles (deg) of **1-4**.

|                         | 1                    | 2 <sup>a</sup>         | 3                    | 4                    |
|-------------------------|----------------------|------------------------|----------------------|----------------------|
| bond distances (Å)      |                      |                        |                      |                      |
|                         | 1.900 (2)            | 1.911 (5)              | 1.962 (2)            | 1.946 (2)            |
| Co–N                    | 1.918 (2)            | 1.924 (6)              | 1.968 (2)            | 1.959 (2)            |
|                         | 1.945 (3)            | 1.927 (6)              | 1.986 (2)            | 1.971 (2)            |
| Co–S                    | 2.283 (9)            | 2.250 (2)              | 2.249 (9)            | 2.269 (1)            |
|                         | 2.293 (9)            | 2.275 (2)              | 2.256 (9)            | 2.291 (9)            |
|                         | 2.319 (9)            | 2.306 (2)              | 2.265 (9)            | 2.301 (9)            |
| bond angles (deg)       |                      |                        |                      |                      |
|                         | 72.98 (7), 93.72 (8) | 72.42 (16), 94.39 (18) | 72.60 (7), 91.64 (7) | 72.32 (7), 96.56 (7) |
| N–Co–S <sub>cis</sub>   | 72.91 (7), 95.30 (7) | 72.42 (18), 95.92 (18) | 73.23 (8), 90.09 (7) | 71.70 (7), 90.95 (7) |
|                         | 72.16 (8), 99.59 (8) | 72.79 (18), 96.2 (2)   | 72.18 (7), 91.51 (7) | 71.86 (7), 97.06 (8) |
|                         | 94.64 (7)            | 96.61 (17)             | 166.36 (8)           | 101.45 (7)           |
| N–Co–S <sub>trans</sub> | 100.20 (8)           | 99.05 (18)             | 167.53 (8)           | 101.34 (8)           |
|                         | 166.68 (8)           | 166.86 (18)            | 167.20 (8)           | 163.72 (7)           |
|                         | 93.05 (10)           | 93.7 (3)               | 100.94 (10)          | 94.27 (11)           |
| N–Co–N <sub>cis</sub>   | 95.76 (11)           | 99.4 (2)               | 101.56 (11)          | 99.03 (10)           |
| N–Co–N <sub>trans</sub> | 169.31 (10)          | 162.5 (2)              | 102.12 (10)          | 164.21 (10)          |
|                         | 92.44 (3)            | 94.55 (8)              | 94.49 (3)            | 93.13 (4)            |
| S–Co–S <sub>cis</sub>   | 101.61 (4)           | 97.49 (8)              | 95.82 (3)            | 94.55 (3)            |
| S–Co–S <sub>trans</sub> | 162.72 (4)           | 166.03 (9)             | 96.37 (3)            | 170.62 (3)           |

<sup>a</sup>Data are given for only one of the three symmetry independent molecules of the asymmetric unit of the crystallographic unit cell.

Table S3. Bond distances (Å) and angles (deg) of **5**.

| bond distances (Å) |            |           |            |           |            |
|--------------------|------------|-----------|------------|-----------|------------|
| Co1–P1             | 2.270 (2)  | Co1–N3    | 1.957 (3)  | Co1–S2    | 2.335 (1)  |
| Co1–N1             | 1.950 (3)  | Co1–S1    | 2.307 (1)  | Co1–S3    | 2.287 (1)  |
| bond angles (deg)  |            |           |            |           |            |
| P1–Co1–S1          | 100.23 (5) | S2–Co1–S3 | 166.60 (4) | S3–Co1–N1 | 93.68 (11) |
| P1–Co1–S2          | 91.60 (5)  | P1–Co1–N1 | 172.42 (9) | S1–Co1–N3 | 161.97 (9) |
| P1–Co1–S3          | 86.32 (5)  | P1–Co1–N3 | 94.40 (10) | S2–Co1–N3 | 71.40 (10) |
| S1–Co1–S2          | 97.54 (6)  | S1–Co1–N1 | 72.22 (10) | S3–Co1–N3 | 95.54 (10) |
| S1–Co1–S3          | 95.85 (6)  | S2–Co1–N1 | 90.11 (10) | N1–Co1–N3 | 93.15 (12) |

Table S4. Bond distances (Å) and angles (deg) of **7** and **8**.

| 7                  |            |           |            | 8         |            |           |             |
|--------------------|------------|-----------|------------|-----------|------------|-----------|-------------|
| bond distances (Å) |            |           |            |           |            |           |             |
| Co1–S1             | 2.284 (1)  | Co1–N2    | 1.967 (2)  | Co1–S1    | 2.291 (1)  | Co1–N2    | 1.932 (3)   |
| Co1–S2             | 2.292 (1)  | Co1–P1    | 2.227 (1)  | Co1–S2    | 2.317 (1)  | Co1–N3    | 1.951 (4)   |
| Co1–N1             | 1.962 (2)  | Co1–P2    | 2.222 (1)  | Co1–N1    | 1.923 (3)  | Co1–N4    | 1.961 (3)   |
| bond angles (deg)  |            |           |            |           |            |           |             |
| P1–Co1–P2          | 87.38 (3)  | S1–Co1–S2 | 165.70 (4) | S1–Co1–N1 | 72.23 (10) | S1–Co1–S2 | 162.71 (5)  |
| P1–Co1–S1          | 101.16 (3) | S1–Co1–N1 | 72.41 (8)  | S2–Co1–N1 | 95.31 (10) | N1–Co1–N2 | 87.99 (14)  |
| P2–Co1–S1          | 90.39 (3)  | S2–Co1–N1 | 96.72 (8)  | S1–Co1–N2 | 95.16 (10) | N1–Co1–N3 | 170.74 (15) |
| P1–Co1–S2          | 89.44 (3)  | S1–Co1–N2 | 97.22 (7)  | S2–Co1–N2 | 71.96 (10) | N1–Co1–N4 | 92.19 (13)  |
| P2–Co1–S2          | 99.75 (3)  | S2–Co1–N2 | 72.60 (7)  | S1–Co1–N3 | 98.81 (11) | N2–Co1–N3 | 90.54 (14)  |
| P1–Co1–N1          | 173.47 (8) | P1–Co1–N2 | 92.02 (7)  | S2–Co1–N3 | 92.92 (11) | N2–Co1–N4 | 171.31 (14) |
| P2–Co1–N1          | 93.68 (7)  | P2–Co1–N2 | 172.34 (7) | S1–Co1–N4 | 93.16 (10) | N3–Co1–N4 | 90.64 (14)  |
| N1–Co1–N2          | 87.79 (9)  |           |            | S2–Co1–N4 | 99.39 (10) |           |             |

## S2.2 $^1\text{H}$ and $^{13}\text{C}\{\text{H}\}$ NMR spectra of Co(III) complexes

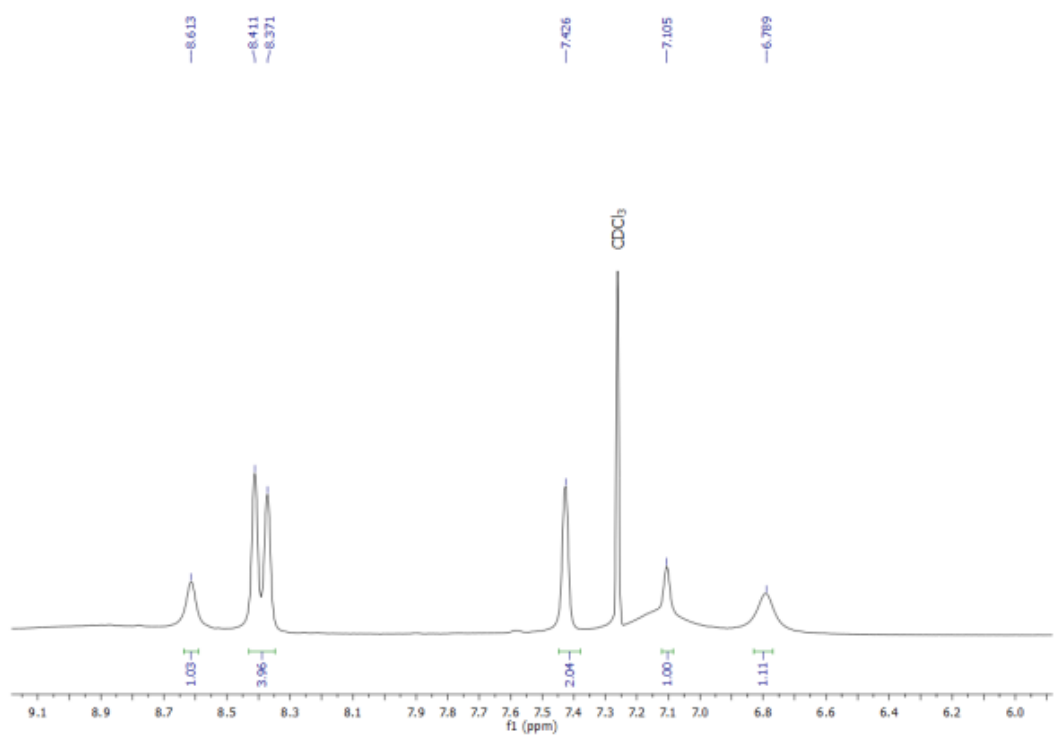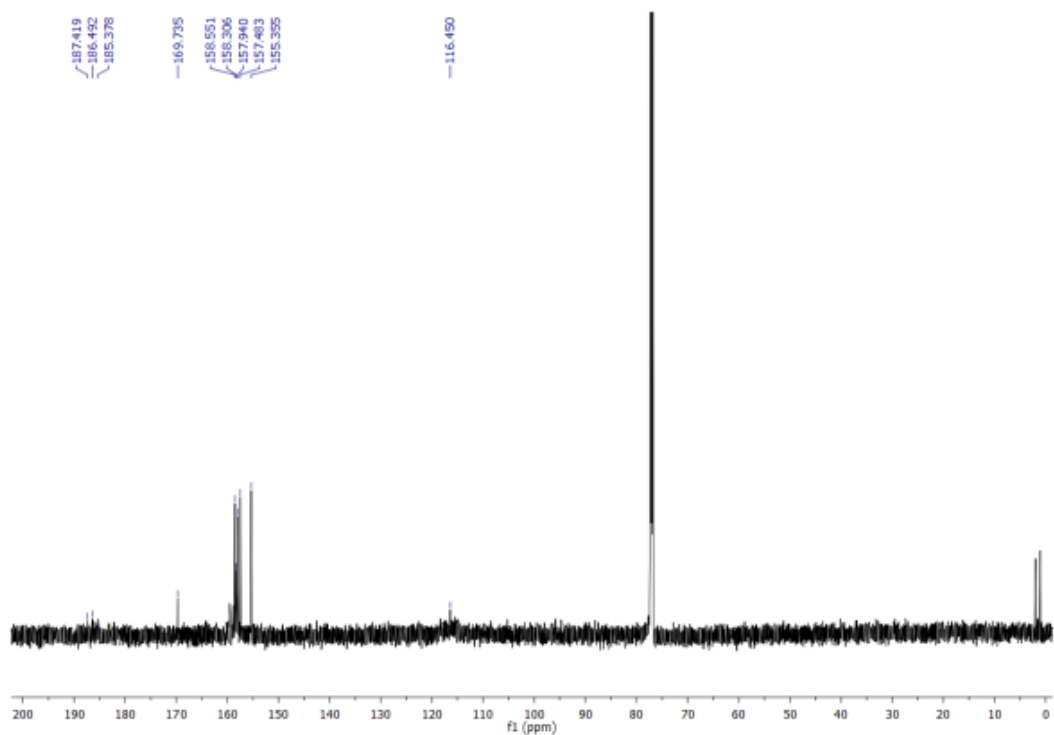

Figure S1.  $^1\text{H}$  NMR (500 MHz,  $\text{CDCl}_3$ ) and  $^{13}\text{C}\{\text{H}\}$  NMR (125 MHz,  $\text{CDCl}_3$ ) spectra of **1**.

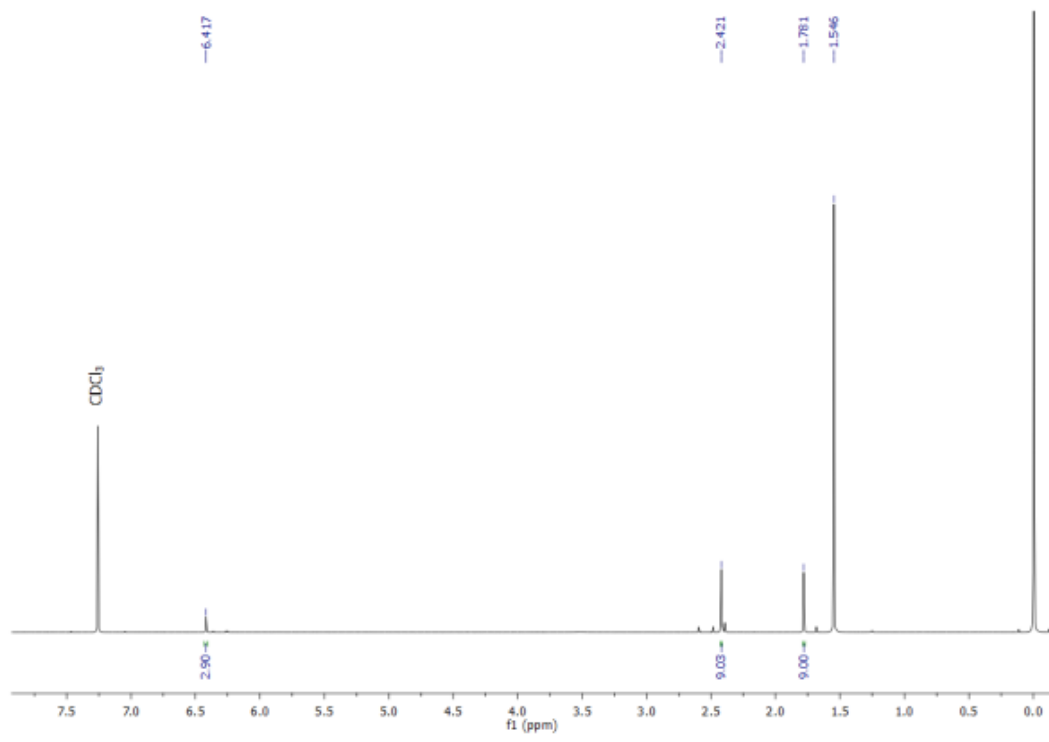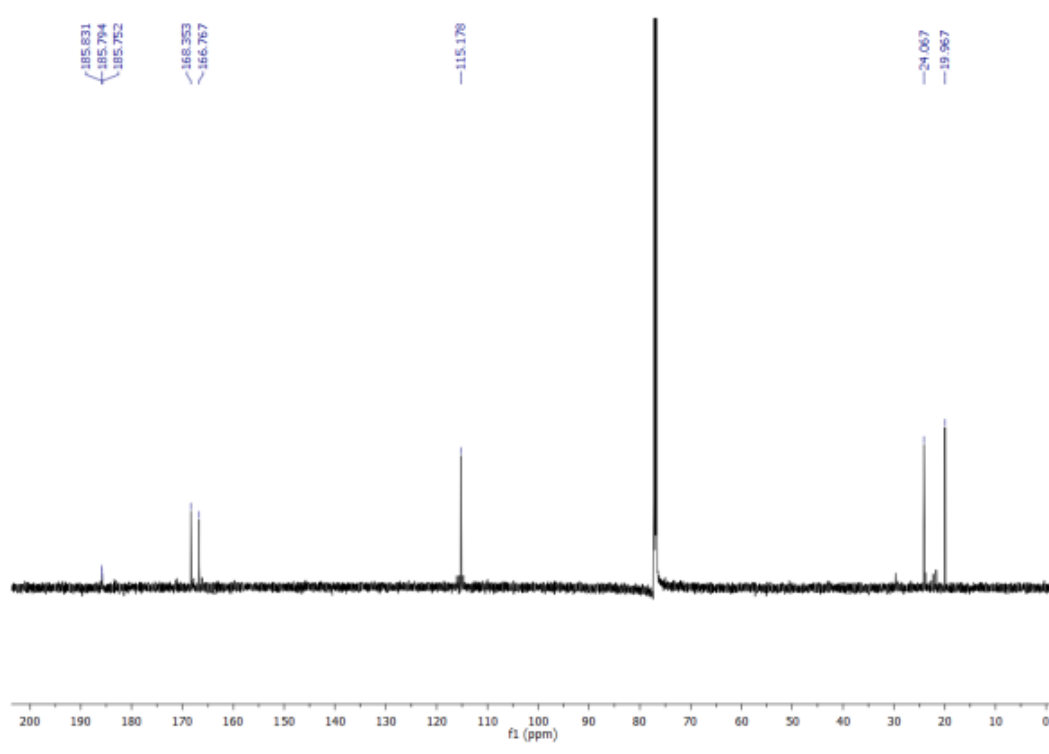

Figure S2.  $^1\text{H}$  NMR (500 MHz,  $\text{CDCl}_3$ ) and  $^{13}\text{C}\{^1\text{H}\}$  NMR (125 MHz,  $\text{CDCl}_3$ ) spectra of **3**.

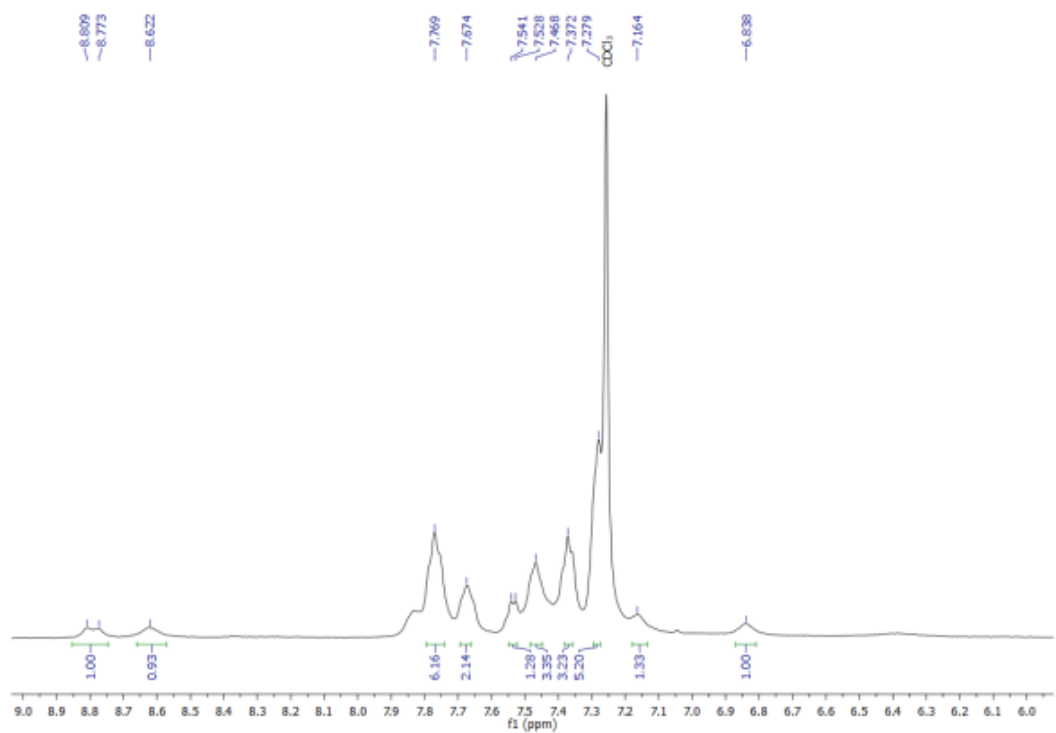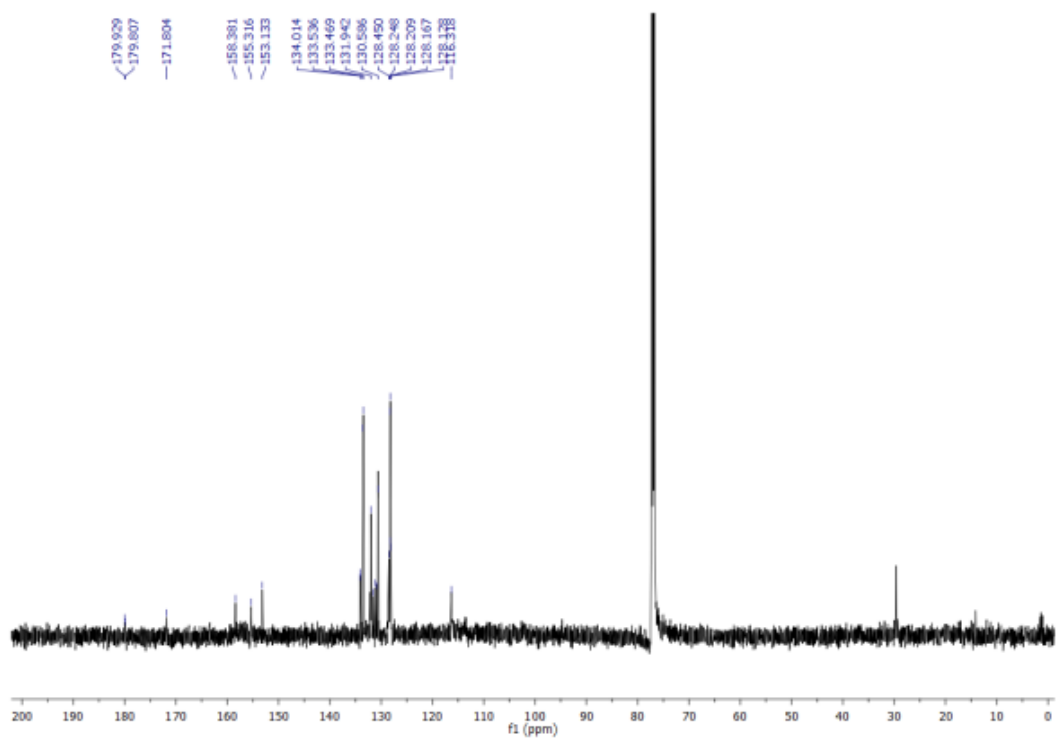

Figure S3.  $^1\text{H}$  NMR (500 MHz,  $\text{CDCl}_3$ ) and  $^{13}\text{C}\{^1\text{H}\}$  NMR (125 MHz,  $\text{CDCl}_3$ ) spectra of **5**.

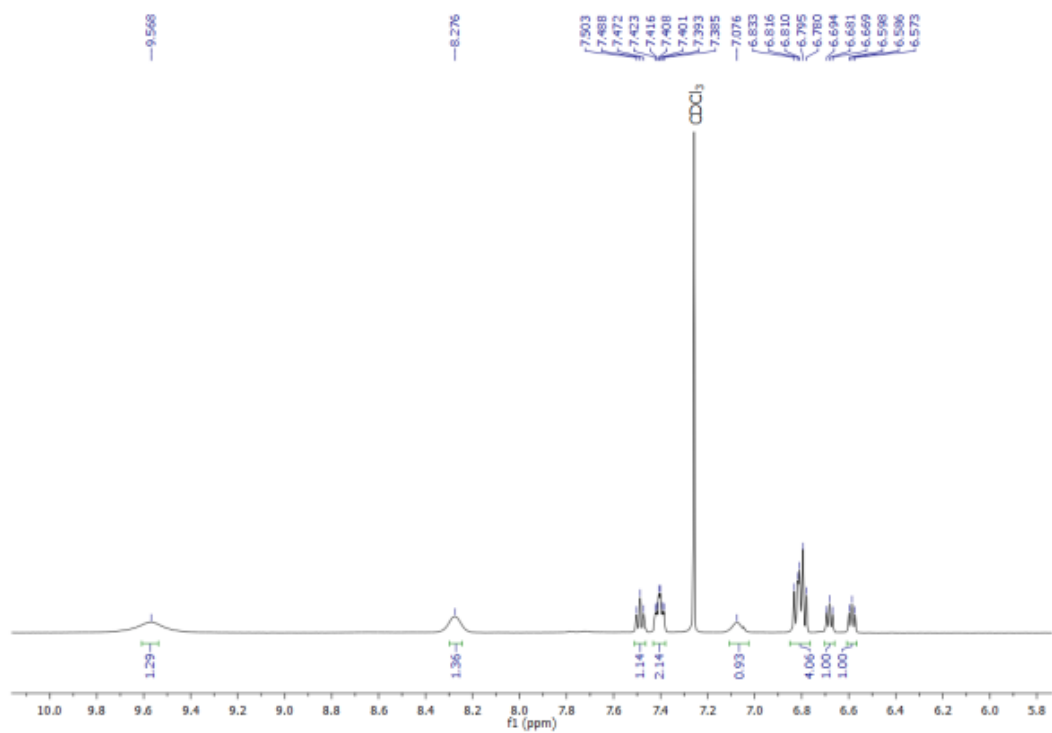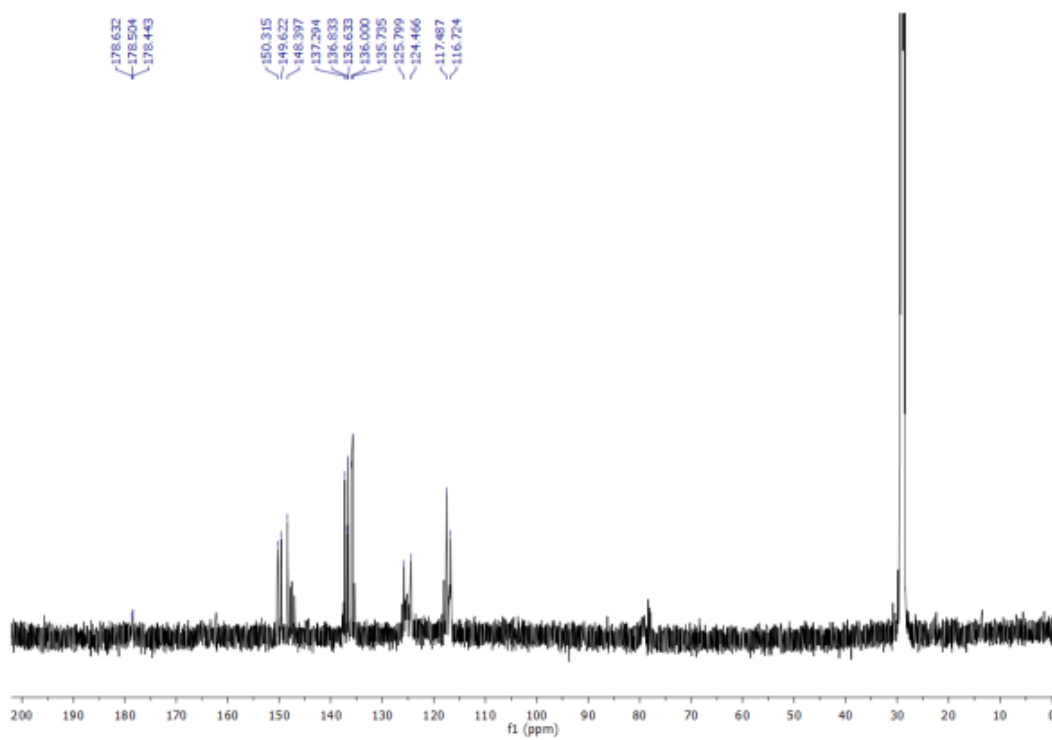

Figure S4. <sup>1</sup>H NMR (500 MHz, CDCl<sub>3</sub>) and <sup>13</sup>C{H} NMR (125 MHz, CDCl<sub>3</sub>) spectra of 6.



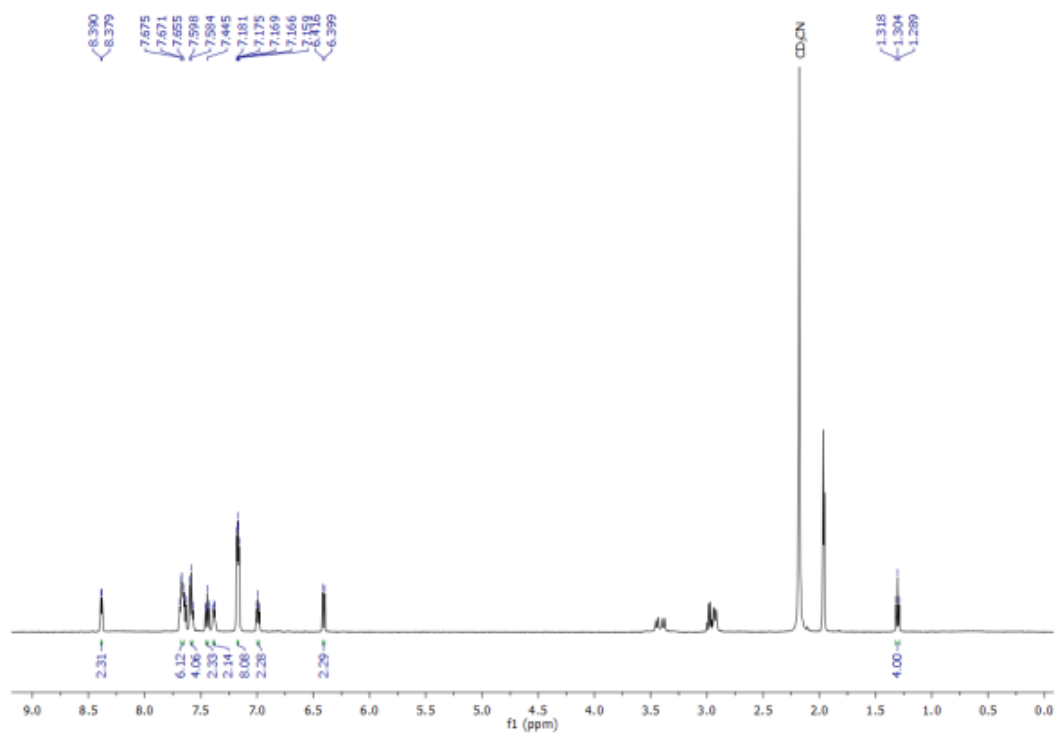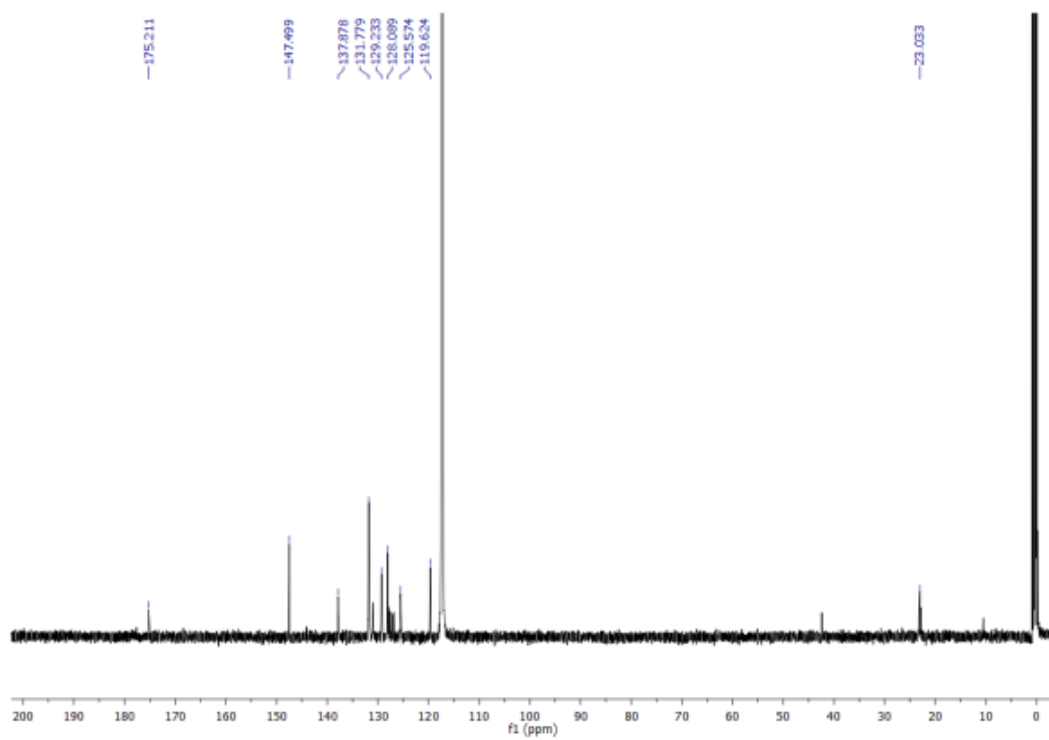

Figure S5.  $^1\text{H}$  NMR (500 MHz,  $\text{CD}_3\text{CN}$ ) and  $^{13}\text{C}\{\text{H}\}$  NMR (125 MHz,  $\text{CD}_3\text{CN}$ ) spectra of **7**.

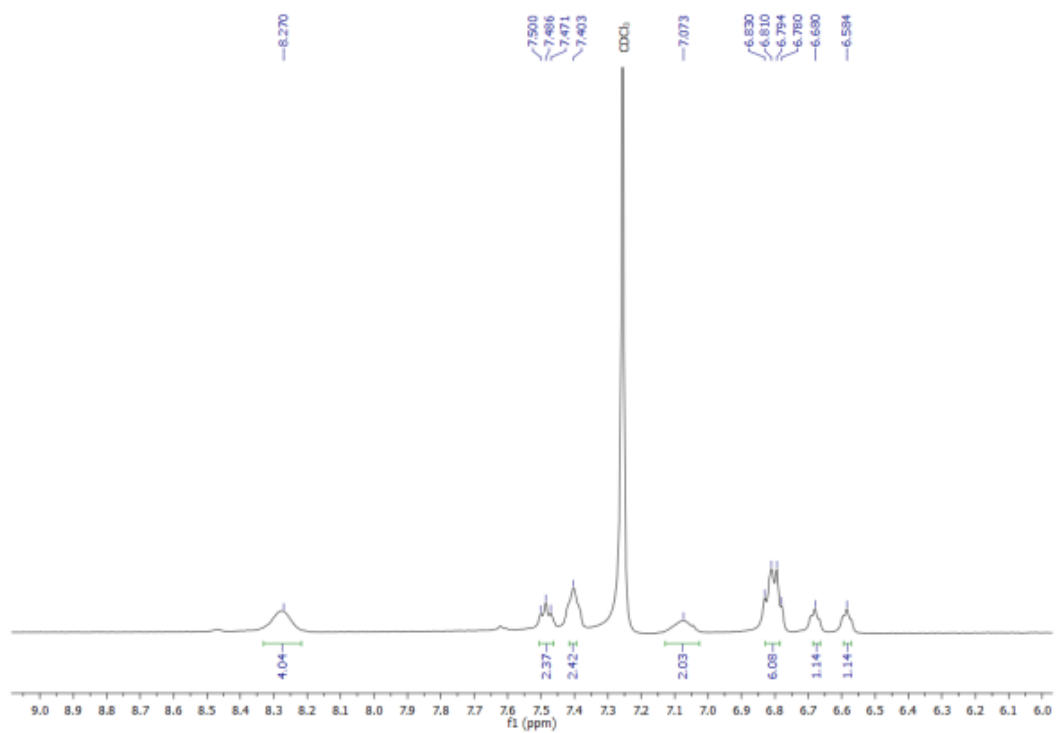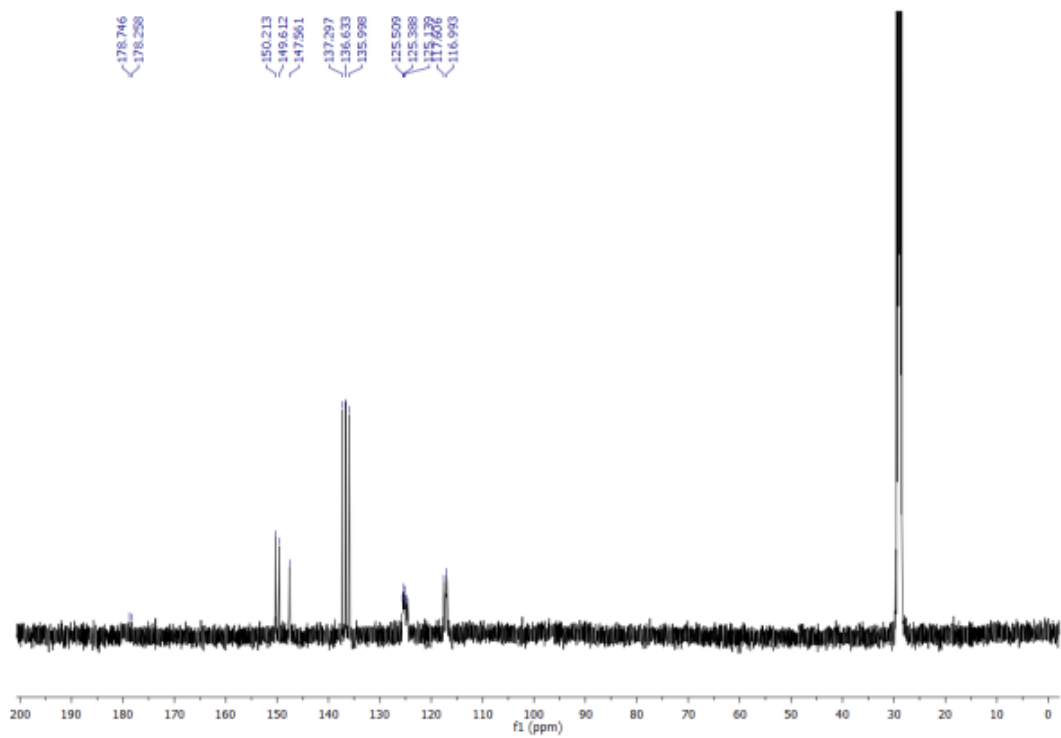

Figure S6. <sup>1</sup>H NMR (500 MHz, CDCl<sub>3</sub>) and <sup>13</sup>C{<sup>1</sup>H} NMR (125 MHz, CDCl<sub>3</sub>) spectra of **8**.

### S2.3 Catalytic reactions

Table S5. Reduction of **1a** to **1b** catalyzed by **1-8**, in the presence of CH<sub>3</sub>NHNH<sub>2</sub>, in 1 mL CH<sub>3</sub>OH at 70°C and for 4 h.

| Catalyst <sup>[a]</sup>  | Conversion (%) <sup>[b]</sup> | <b>1b</b> (%) <sup>[c]</sup> | <b>1c</b> (%) <sup>[c]</sup> | <b>1d</b> (%) <sup>[c]</sup> |
|--------------------------|-------------------------------|------------------------------|------------------------------|------------------------------|
| 1                        | 65                            | 65                           | -                            | -                            |
| 2                        | 95                            | 95                           | -                            | -                            |
| 3                        | 55                            | 55                           | -                            | -                            |
| 4                        | 40                            | 40                           | -                            | -                            |
| 5                        | 85                            | 85                           | -                            | -                            |
| 6                        | 70                            | 70                           | -                            | -                            |
| 7                        | 40                            | 40                           | -                            | -                            |
| 8                        | 55                            | 55                           | -                            | -                            |
| [Co(acac) <sub>3</sub> ] | 30%                           | 30%                          | -                            | -                            |
| No catalyst              | <10%                          | <10%                         | -                            | -                            |

[a] **1a** (0.2 mmol), CH<sub>3</sub>NHNH<sub>2</sub> (5 equiv, 1 mmol), catalysts (1 mol %), in CH<sub>3</sub>OH, at 70°C and for 4 h. [b] Conversion percentages (%) of substrate **1a** were measured by <sup>1</sup>H NMR spectroscopy after addition of a specific amount of 1,3-dimethoxybenzene as internal standard. [c] Product yields were measured by <sup>1</sup>H NMR spectroscopy based on the integration of the appropriate proton peaks.

S2.3.1  $^1\text{H}$  NMR spectra of catalytic reaction product **1b** in the presence of complexes **1-8**

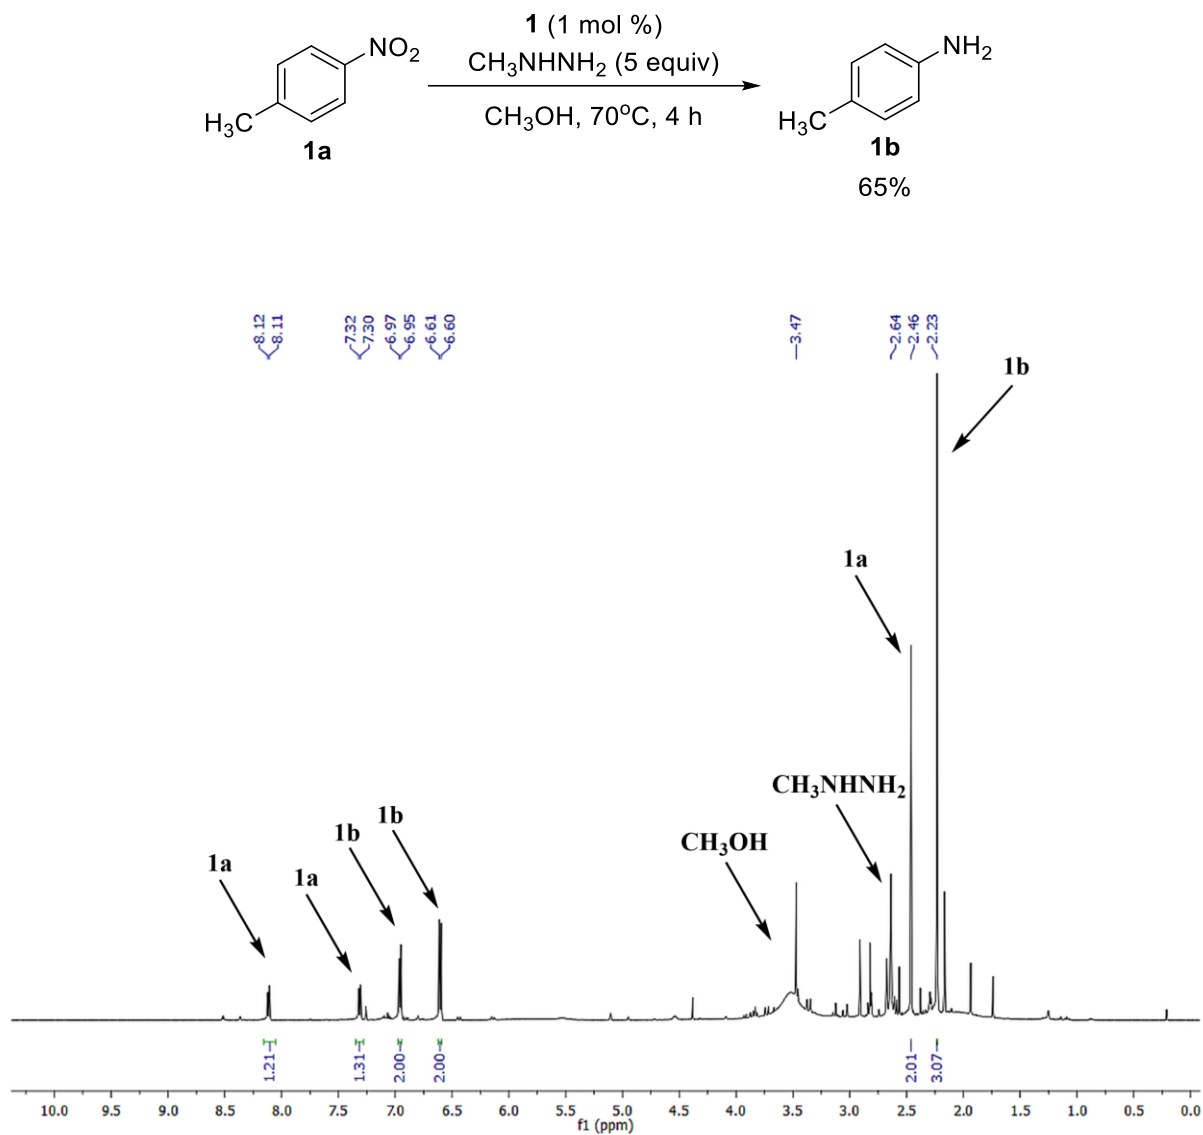

Figure S7.  $^1\text{H}$  NMR spectrum of crude reaction mixture of the reduction of **1a** in the presence **1** and  $\text{CH}_3\text{NHNH}_2$ .

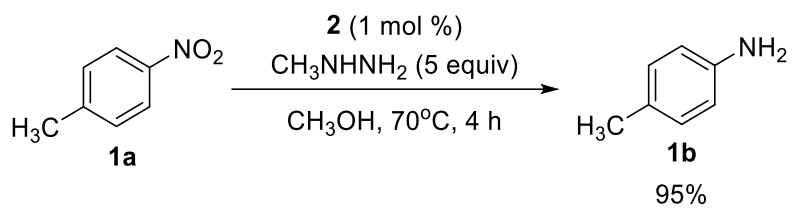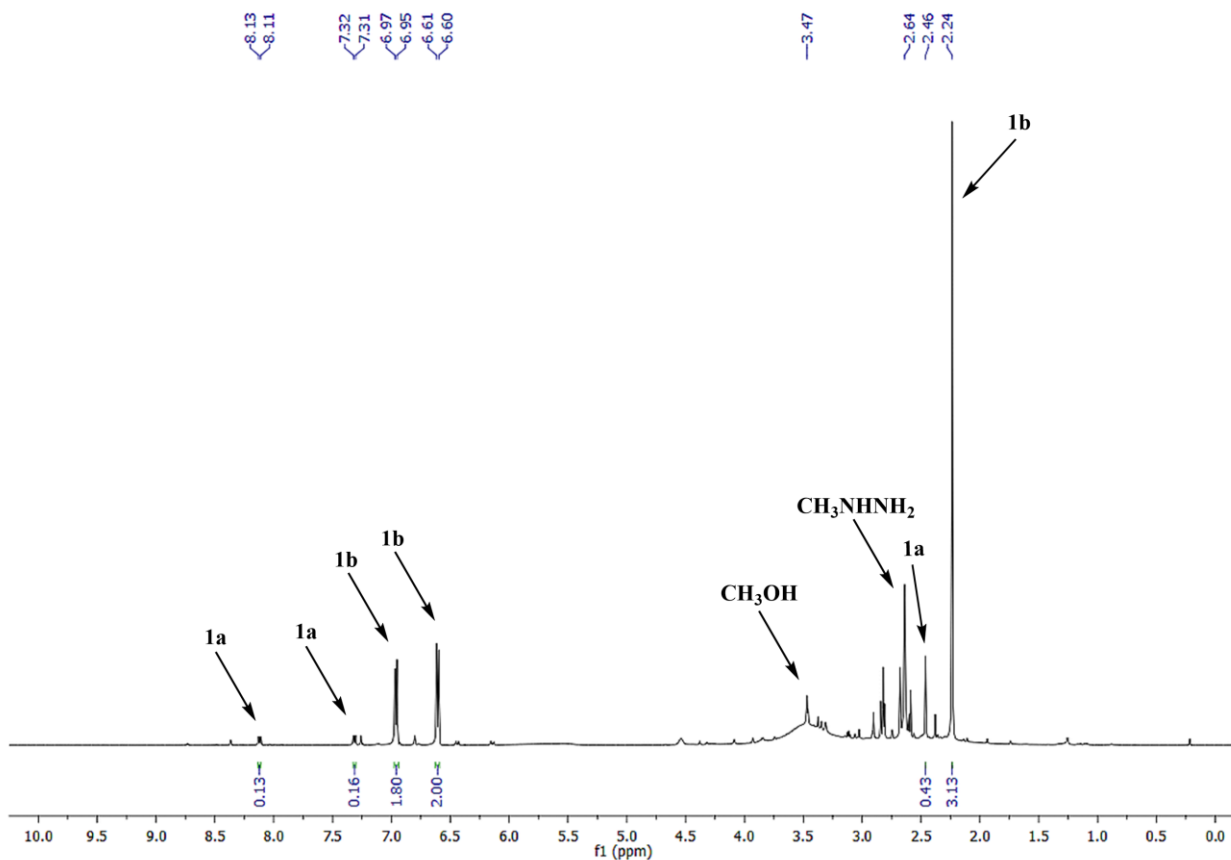

Figure S8. <sup>1</sup>H NMR spectrum of crude reaction mixture of the reduction of **1a** in the presence of **2** and CH<sub>3</sub>NHNH<sub>2</sub>.

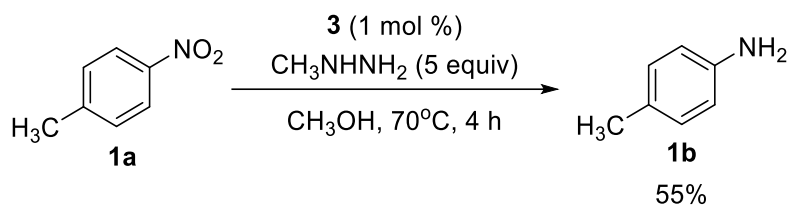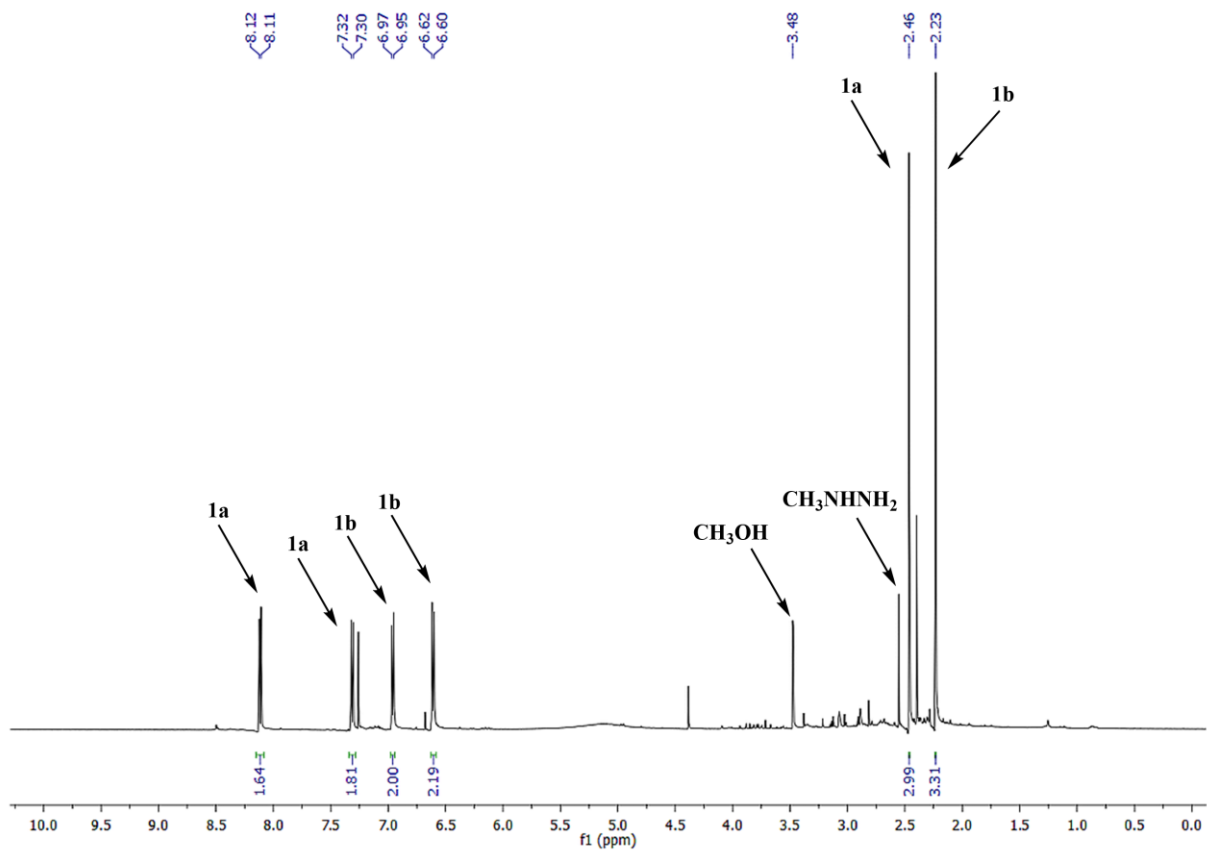

Figure S9. <sup>1</sup>H NMR spectrum of crude reaction mixture of the reduction of **1a** in the presence of **3** and CH<sub>3</sub>NHNH<sub>2</sub>.

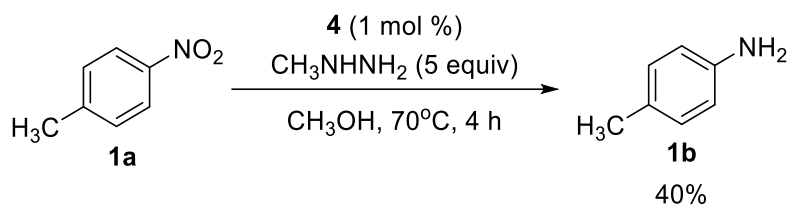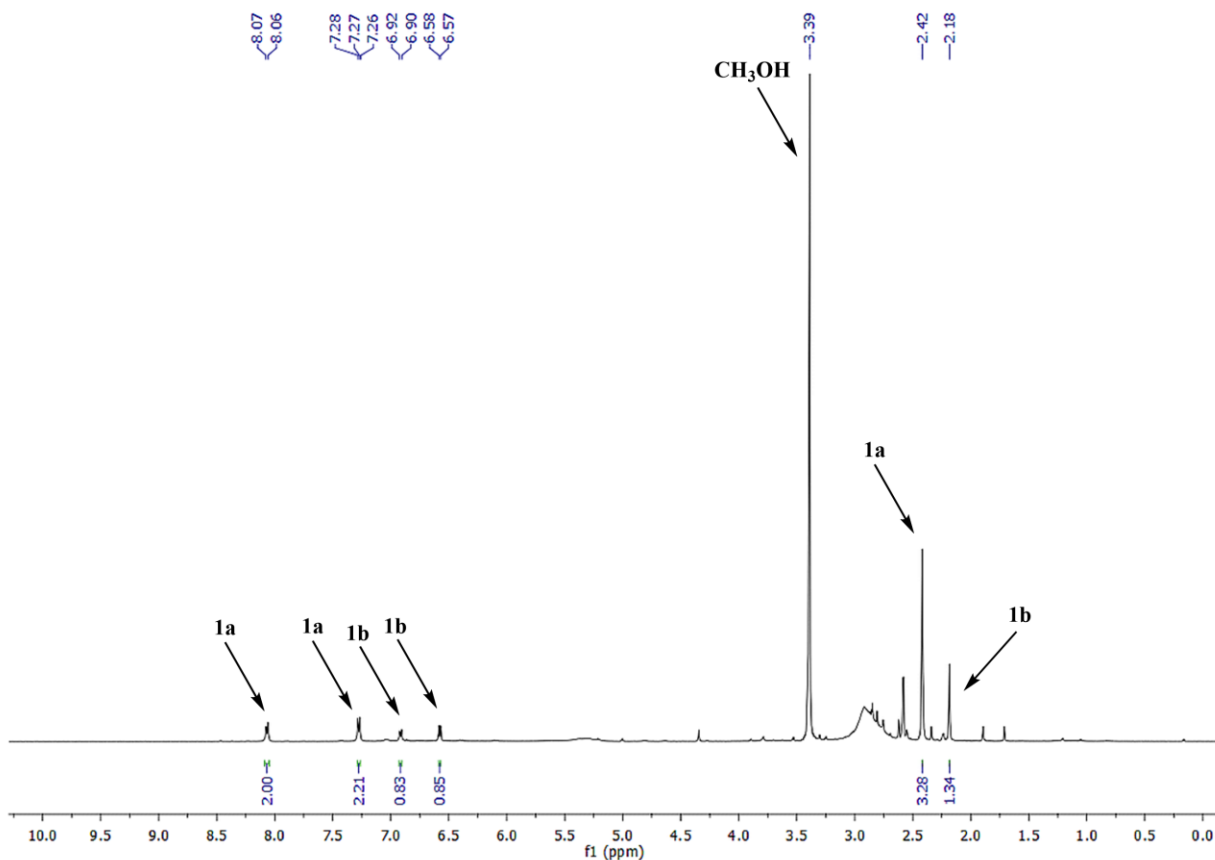

Figure S10. <sup>1</sup>H-NMR spectrum of crude reaction mixture of the reduction of **1a** in the presence of **4** and CH<sub>3</sub>NHNH<sub>2</sub>.

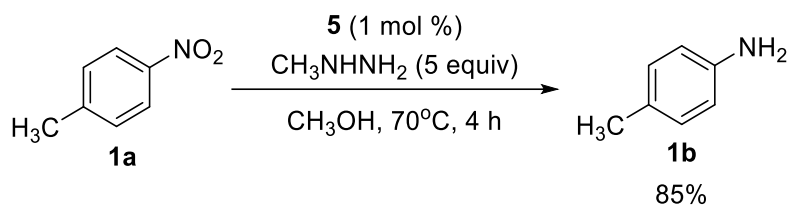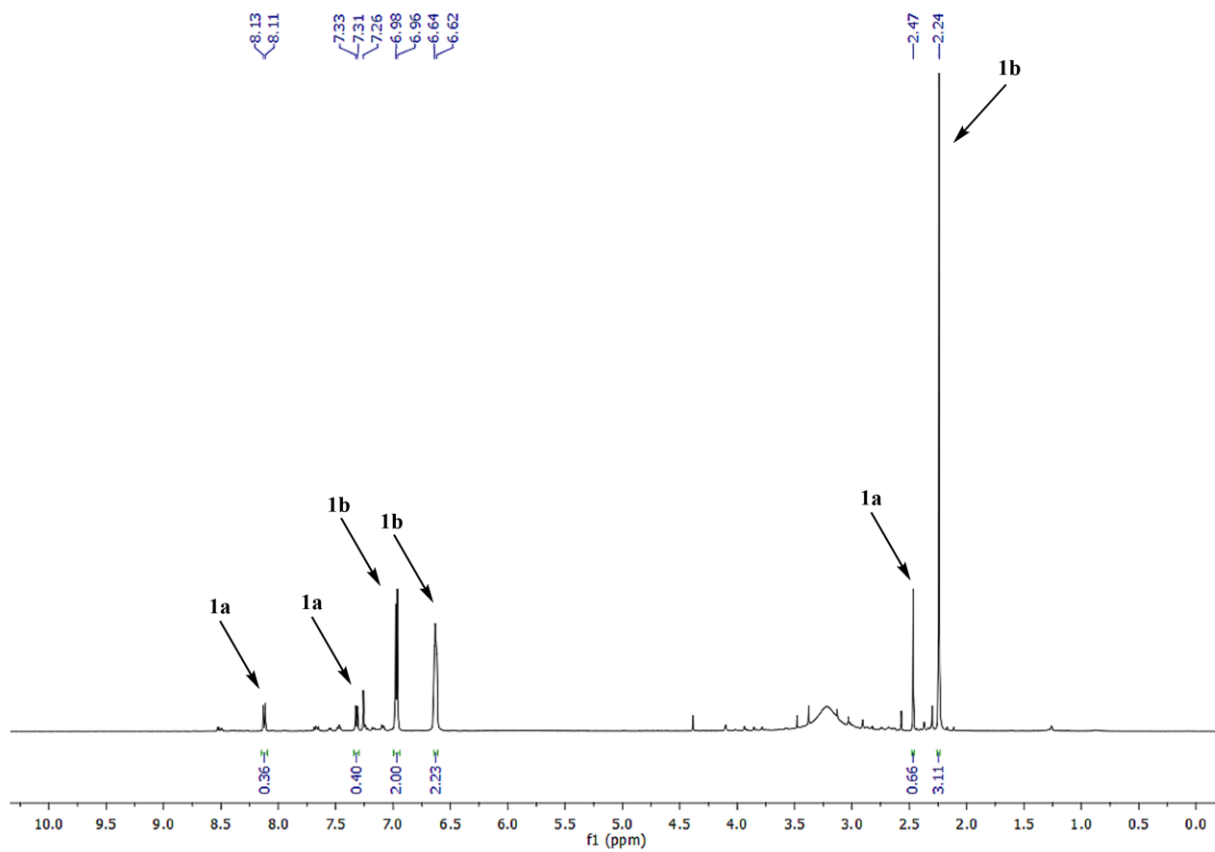

Figure S11. <sup>1</sup>H NMR spectrum of crude reaction mixture of the reduction of **1a** in the presence of **5** and CH<sub>3</sub>NHNH<sub>2</sub>.



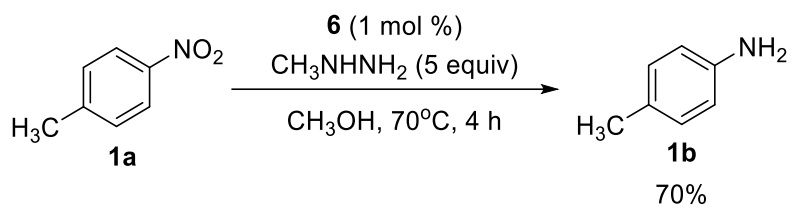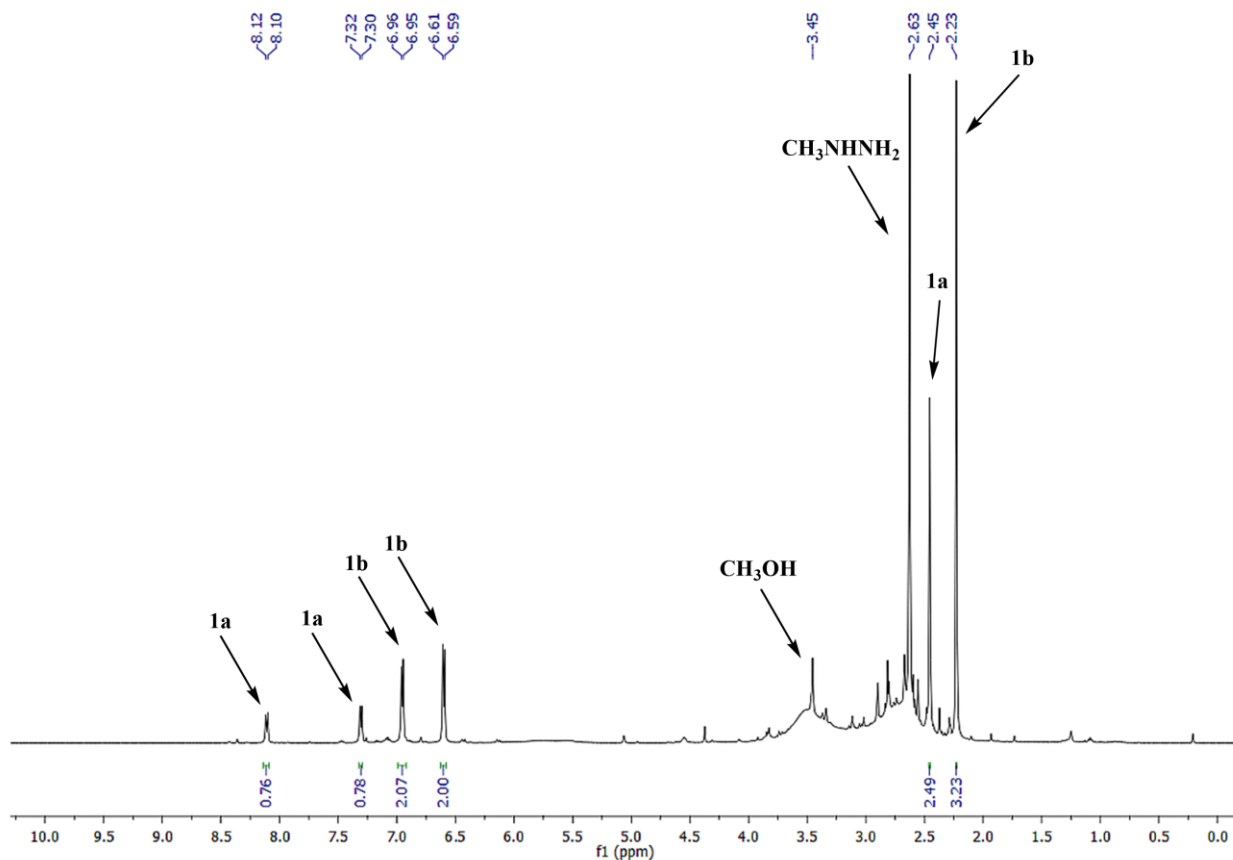

Figure S12. <sup>1</sup>H NMR spectrum of crude reaction mixture of the reduction of **1a** in the presence of **6** and CH<sub>3</sub>NHNH<sub>2</sub>.

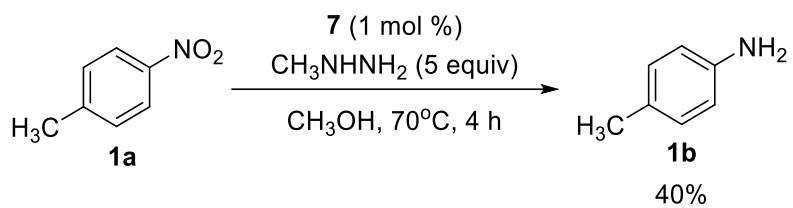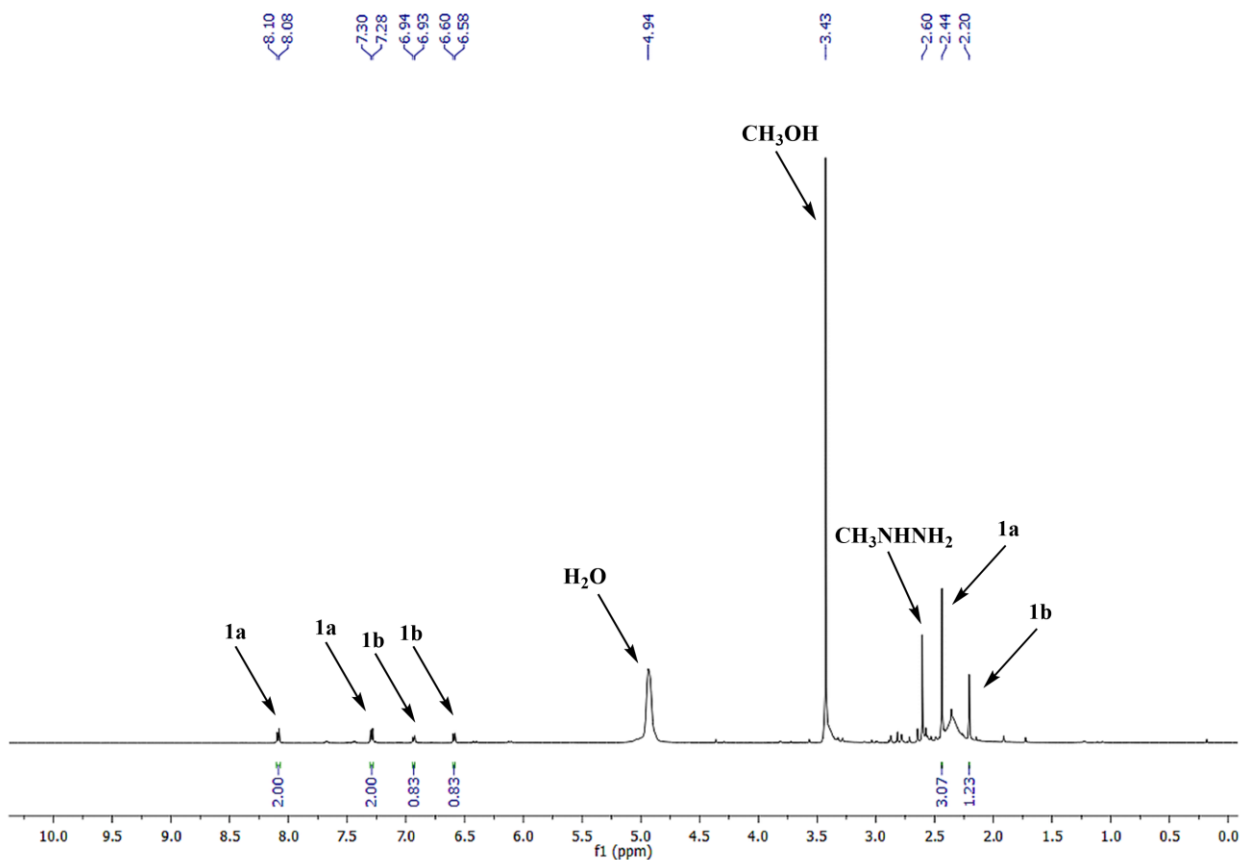

Figure S13. <sup>1</sup>H-NMR spectrum of crude reaction mixture of the reduction of **1a** in the presence of **7** and CH<sub>3</sub>NHNH<sub>2</sub>.

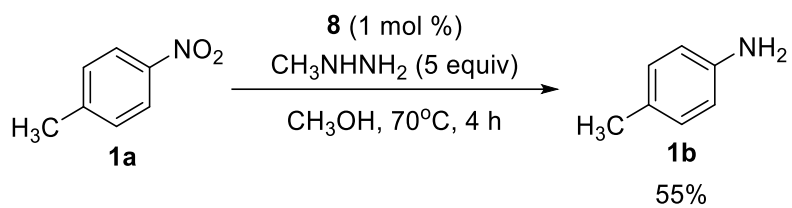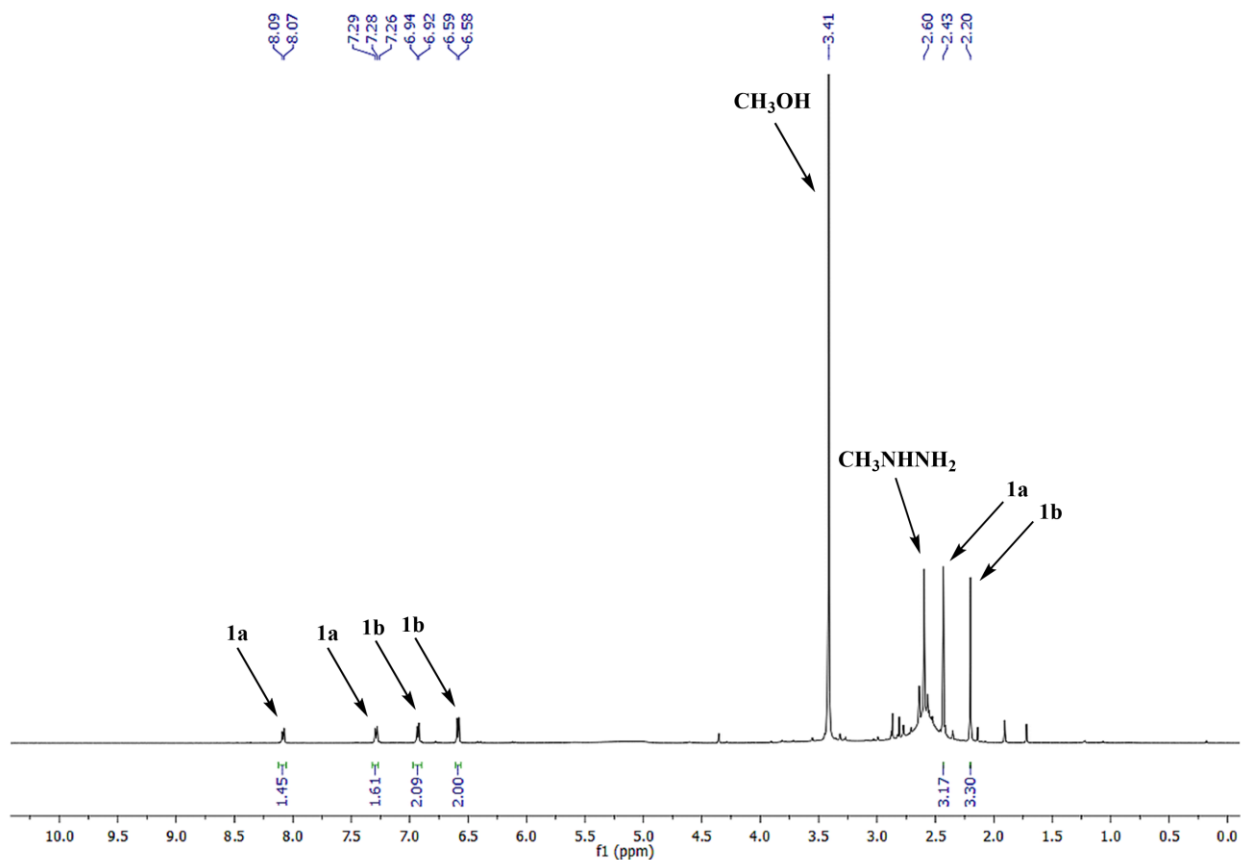

Figure S14. <sup>1</sup>H NMR spectrum of crude reaction mixture of the reduction of **1a** in the presence of **8** and CH<sub>3</sub>NHNH<sub>2</sub>.

S2.3.2  $^1\text{H}$  and  $^{13}\text{C}\{\text{H}\}$  NMR spectra of catalytic reaction products **1b-14b**, **16b** and **17c** in the presence of complex **2**

*p*-Toluidine (**1b**):<sup>4</sup> brown solid, (19 mg, yield: 86%).  $^1\text{H}$  NMR (500 MHz,  $\text{CDCl}_3$ ):  $\delta$  (ppm) 6.97 (d,  $J = 7.6$  Hz, 2 H), 6.62 (d,  $J = 7.6$  Hz, 2 H), 3.56 (br s, 2 H), 2.25 (s, 3 H).  $^{13}\text{C}\{\text{H}\}$  NMR (125 MHz,  $\text{CDCl}_3$ ):  $\delta$  (ppm) 143.8, 129.8, 127.8, 115.3, 20.5.

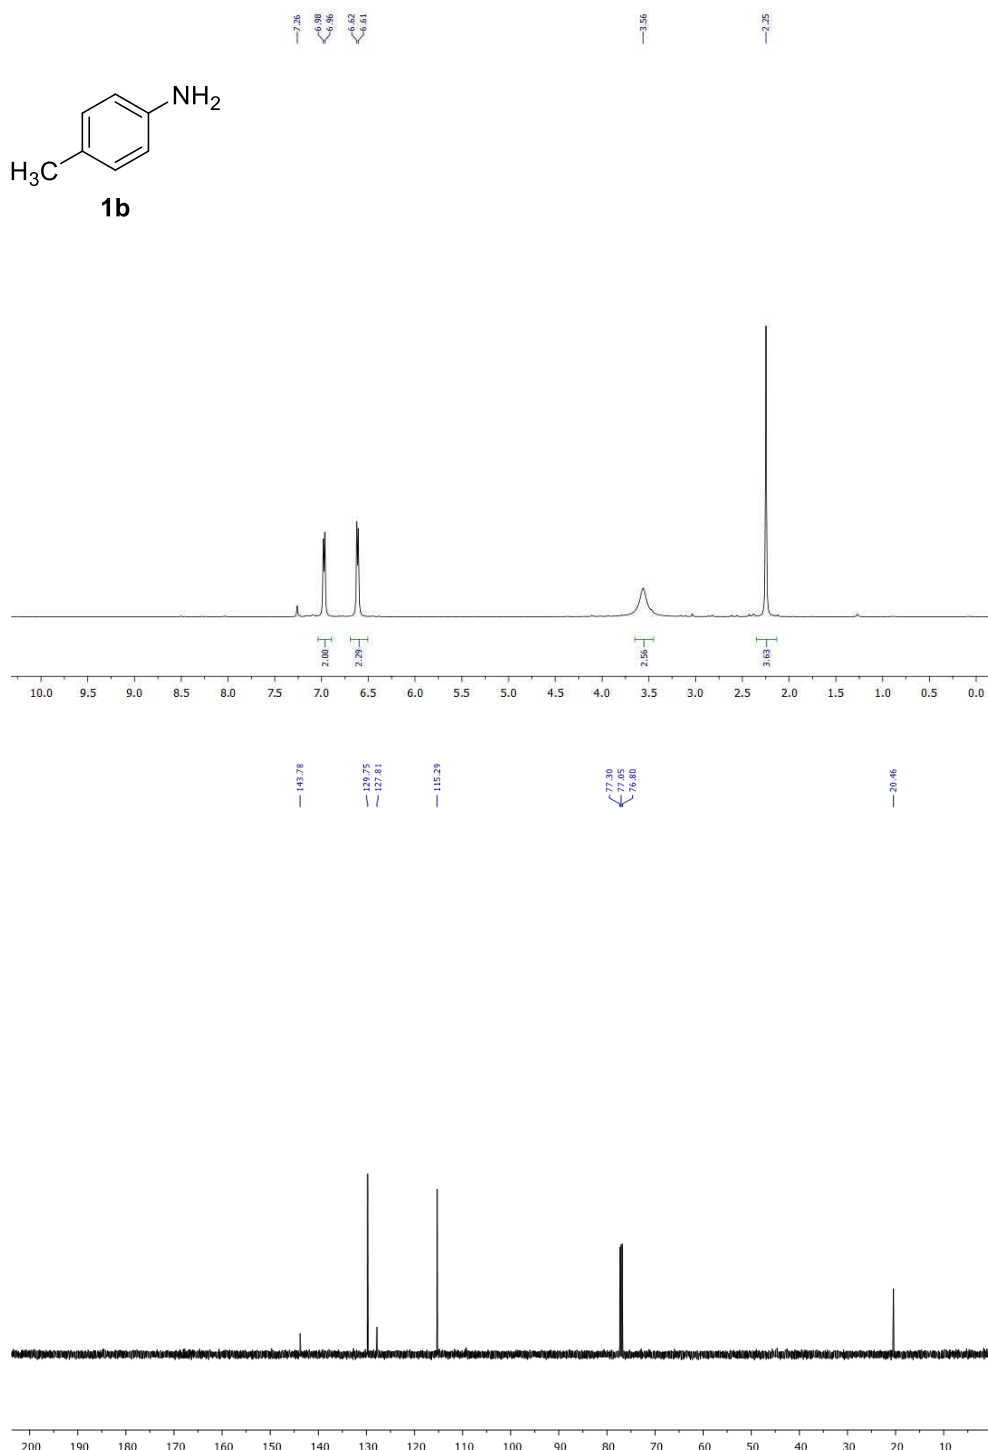

Figure S15.  $^1\text{H}$  NMR (500 MHz,  $\text{CDCl}_3$ ) and  $^{13}\text{C}\{\text{H}\}$  NMR (125 MHz,  $\text{CDCl}_3$ ) spectra of **1b**.

*m*-Toluidine (**2b**):<sup>4</sup> light yellow liquid, (18 mg, yield: 82%). <sup>1</sup>H NMR (500 MHz, CDCl<sub>3</sub>): δ (ppm) 7.10 (t, *J* = 7.6 Hz, 1 H), 6.65 (d, *J* = 7.5 Hz, 1 H), 6.56-6.54 (m, 2 H), 3.54 (br s, 2 H), 2.32 (s, 3 H). <sup>13</sup>C{H} NMR (125 MHz, CDCl<sub>3</sub>): δ (ppm) 146.2, 139.0, 129.1, 119.4, 115.9, 112.2, 21.4.

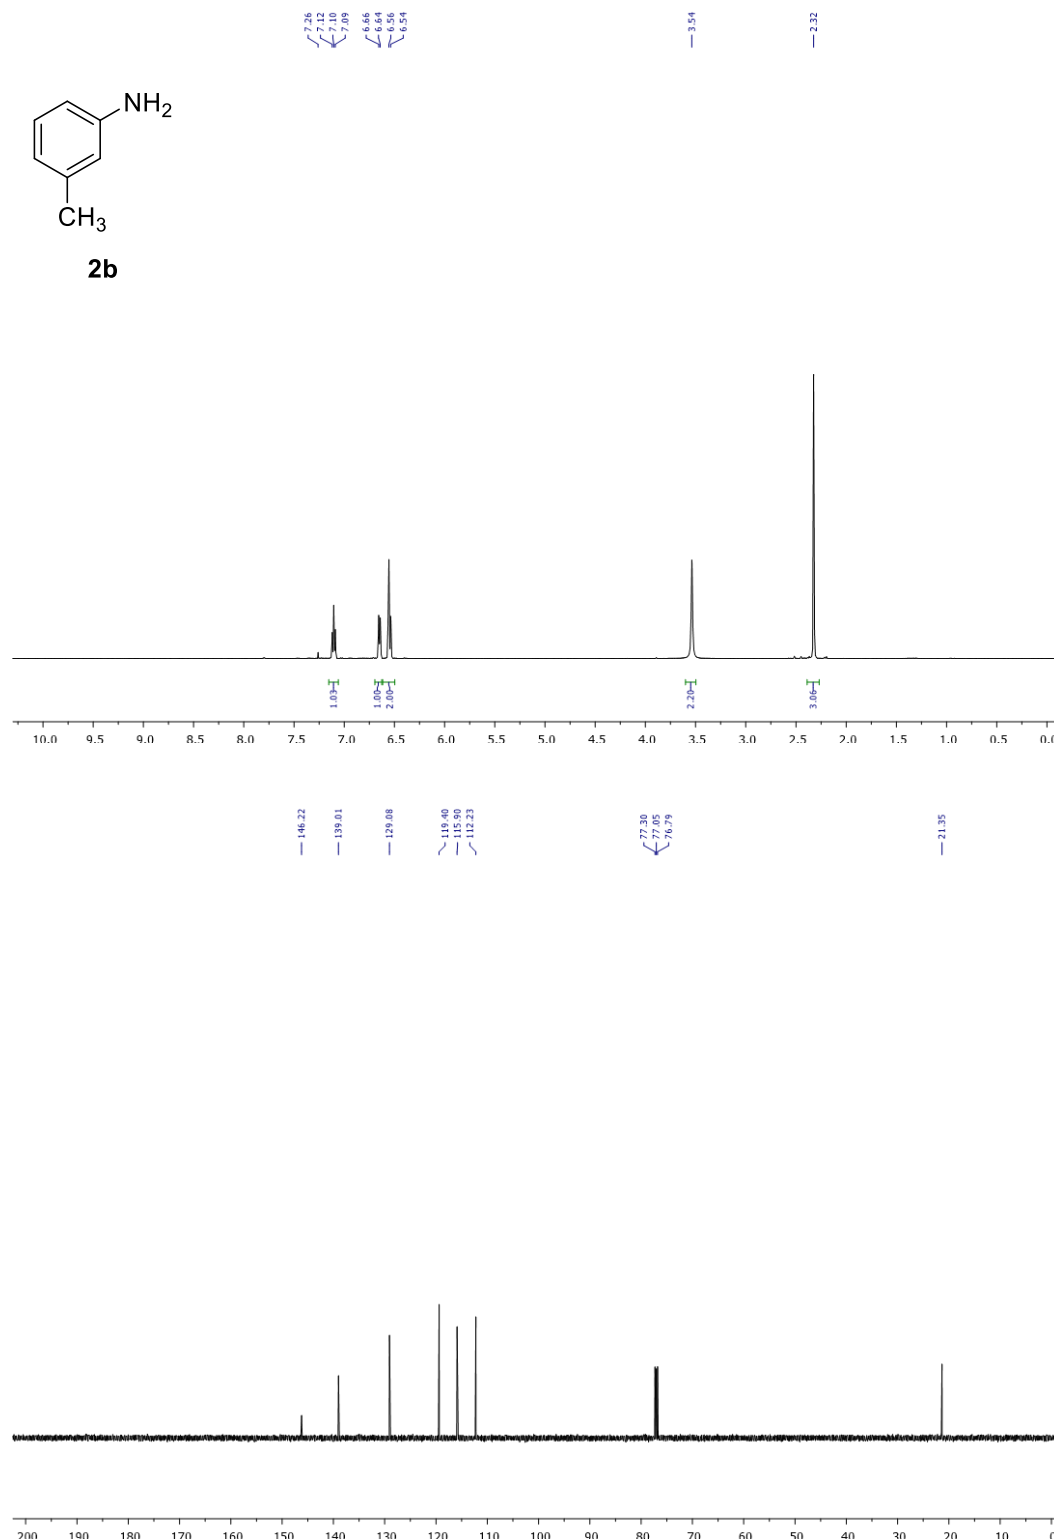

Figure S16. <sup>1</sup>H NMR (500 MHz, CDCl<sub>3</sub>) and <sup>13</sup>C{H} NMR (125 MHz, CDCl<sub>3</sub>) spectra of **2b**.

2,3-dimethylaniline (**3b**): <sup>4</sup> light brown solid, (20 mg, yield 83%). <sup>1</sup>H NMR (500 MHz, CDCl<sub>3</sub>): δ (ppm) 6.94 (t, *J* = 7.7 Hz, 1 H), 6.68 (d, *J* = 7.4 Hz, 1 H), 6.65 (d, *J* = 7.9 Hz, 1 H), 2.27 (s, 3 H), 2.11 (s, 3 H). <sup>13</sup>C{H} NMR (125 MHz, CDCl<sub>3</sub>): δ (ppm) 144.5, 137.2, 126.0, 120.9, 120.7, 113.2, 20.5, 12.7.

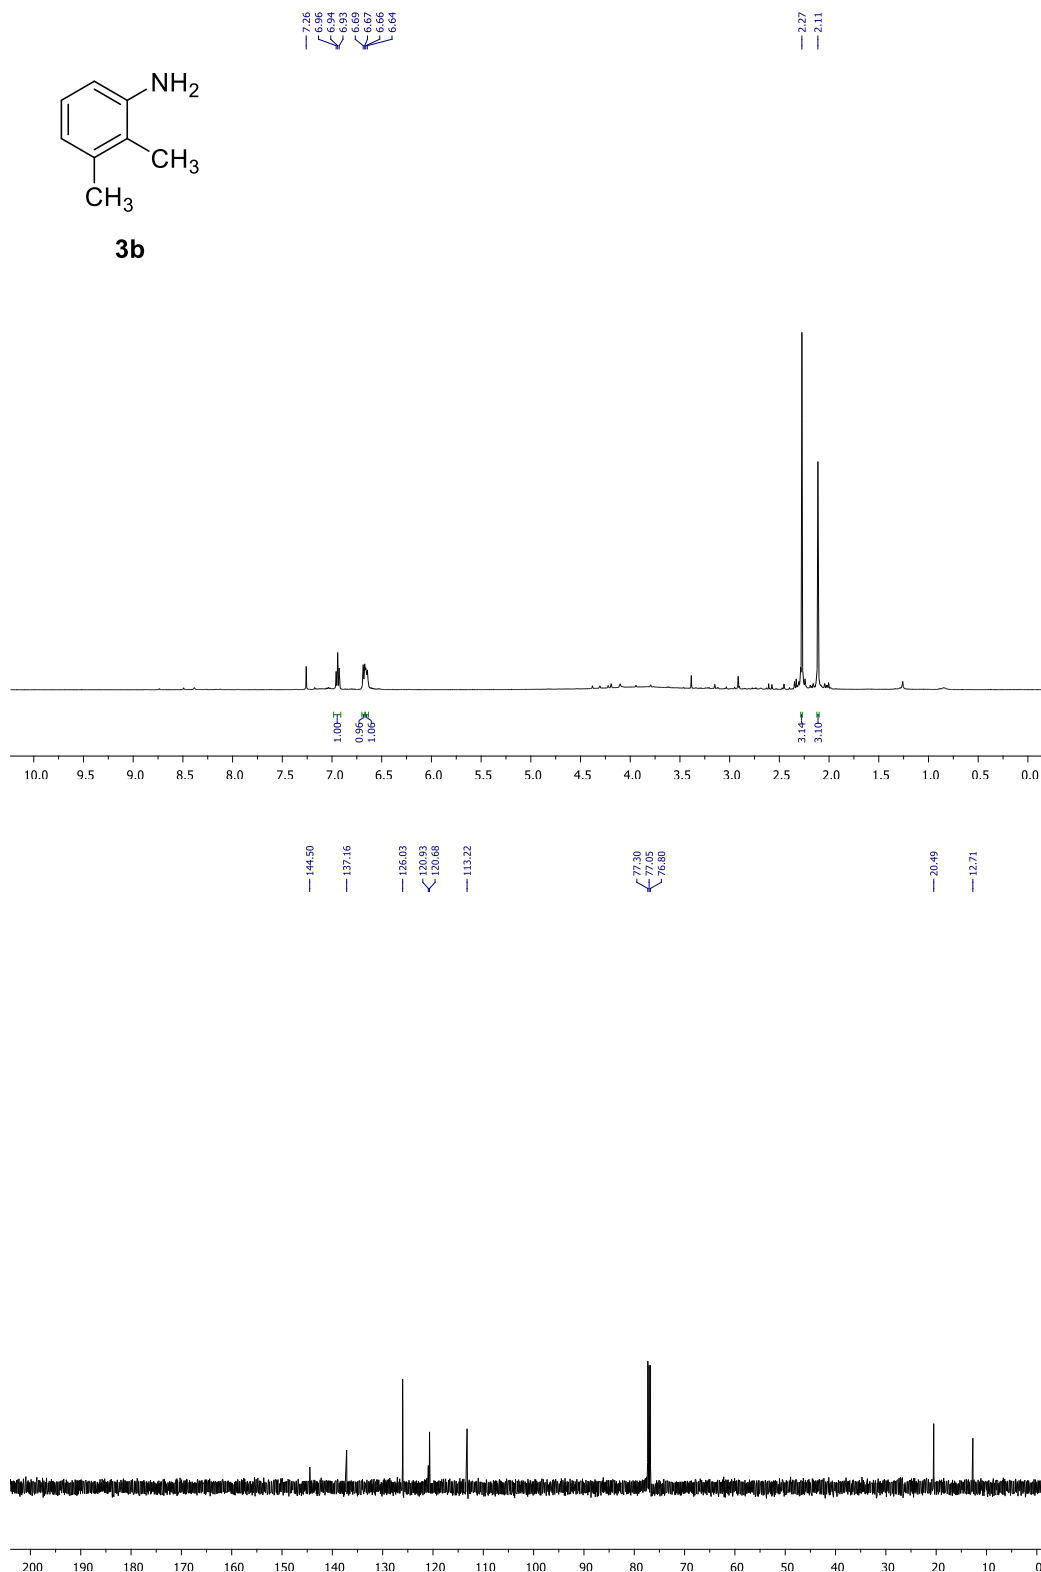

Figure S17. <sup>1</sup>H NMR (500 MHz, CDCl<sub>3</sub>) and <sup>13</sup>C{H} NMR (125 MHz, CDCl<sub>3</sub>) spectra of **3b**.

*benzene-1,4-diamine (4b)*:<sup>7</sup> brown solid, (17 mg, yield 78%). <sup>1</sup>H NMR (500 MHz, CDCl<sub>3</sub>): δ (ppm) 6.56 (s, 4 H). <sup>13</sup>C{H} NMR (125 MHz, CDCl<sub>3</sub>): δ (ppm) 138.5, 116.8.

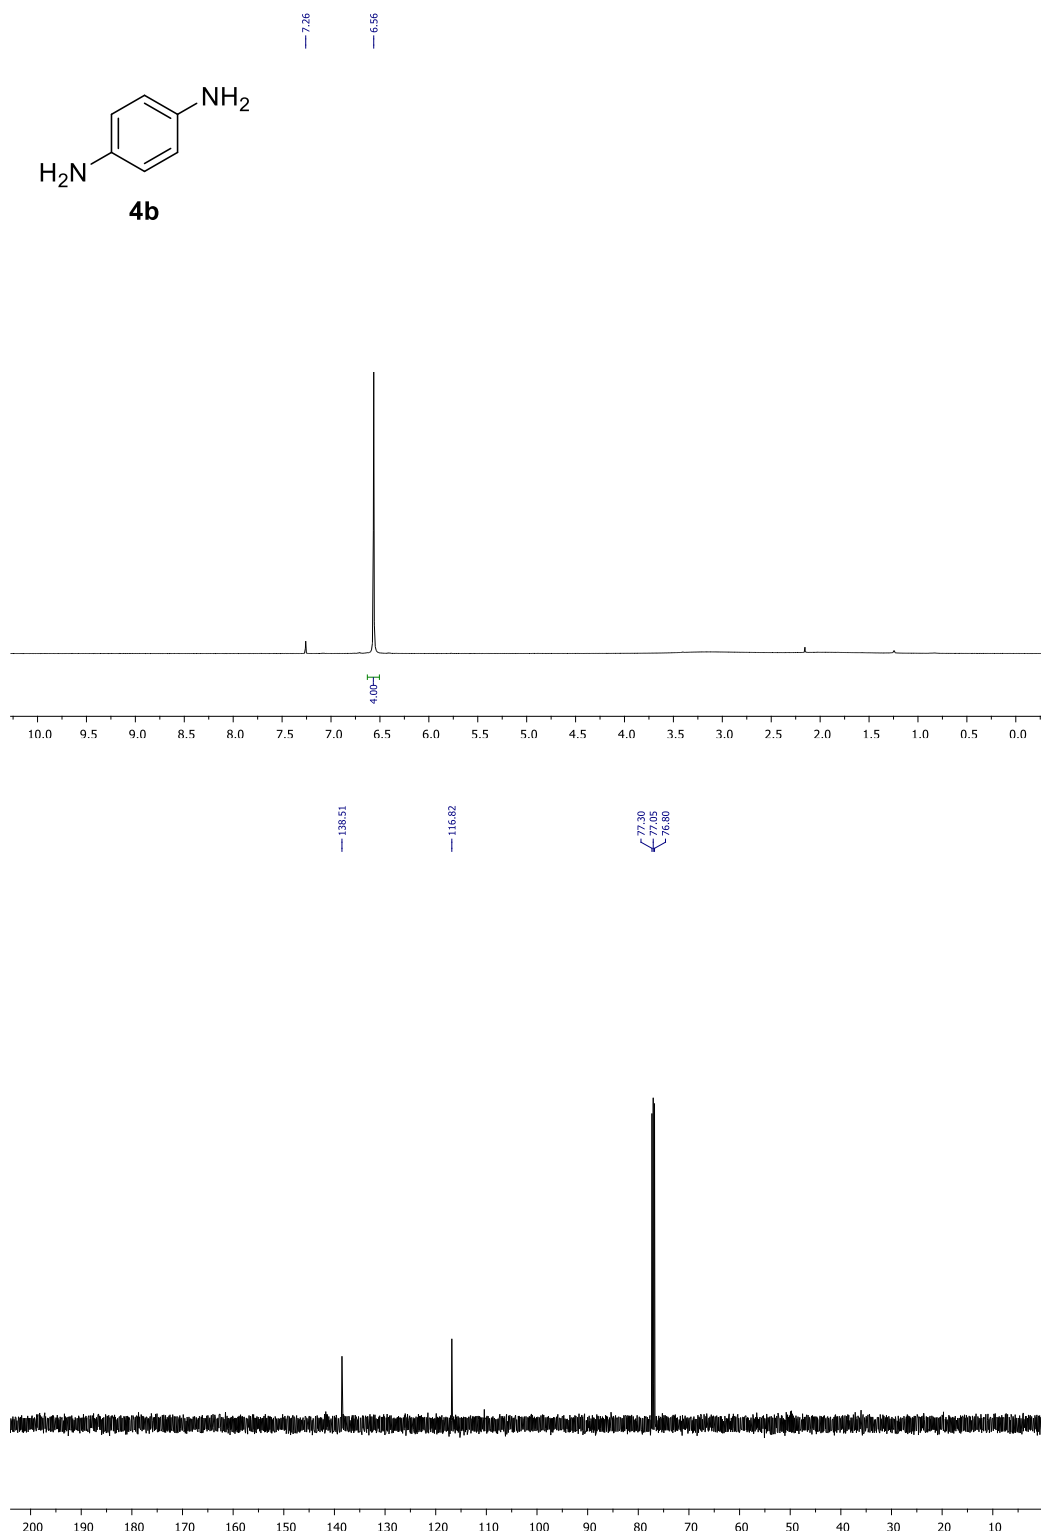

Figure S18. <sup>1</sup>H NMR (500 MHz, CDCl<sub>3</sub>) and <sup>13</sup>C{H} NMR (125 MHz, CDCl<sub>3</sub>) spectra of **4b**.

*m*-Anisidine (**5b**):<sup>5</sup> light yellow liquid, (20 mg, yield: 81%). <sup>1</sup>H NMR (500 MHz, CDCl<sub>3</sub>): δ (ppm) 7.06 (t, *J* = 7.9 Hz, 1 H), 6.34-6.30 (dd, *J* = 7.9, 1.8 Hz, 2 H), 6.25 (s, 1 H), 3.76 (s, 3 H). <sup>13</sup>C{H} NMR (125 MHz, CDCl<sub>3</sub>): 160.7, 147.7, 130.1, 107.9, 103.9, 101.1, 55.1.

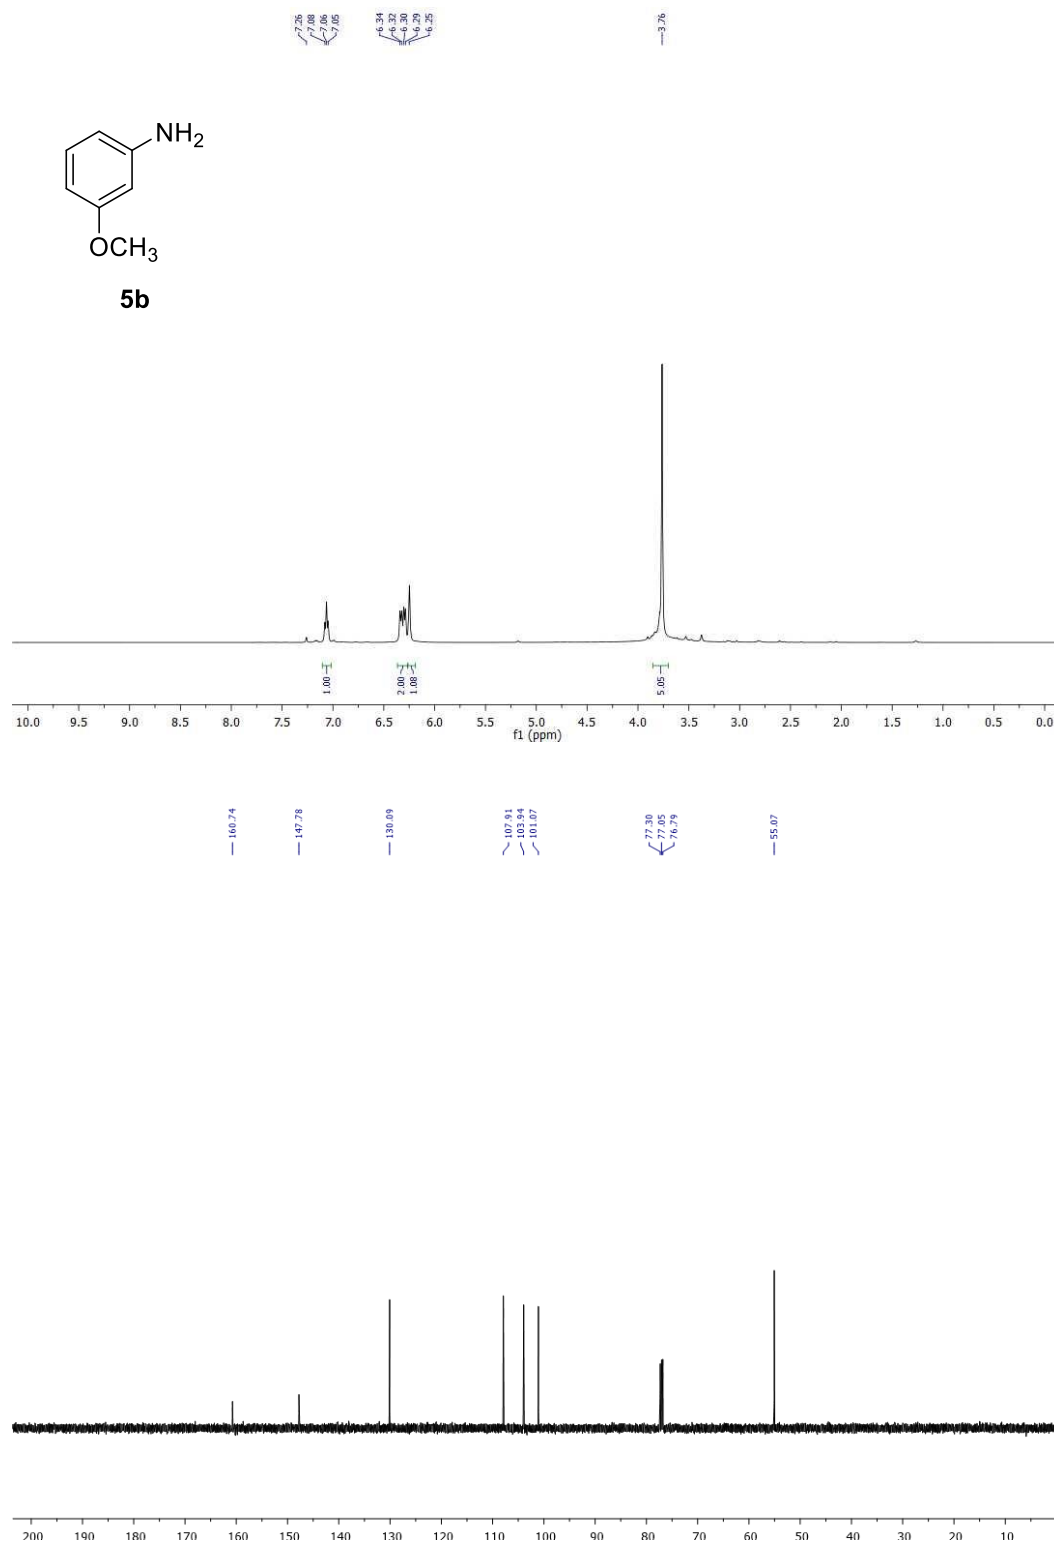

Figure S19. <sup>1</sup>H NMR (500 MHz, CDCl<sub>3</sub>) and <sup>13</sup>C{H} NMR (125 MHz, CDCl<sub>3</sub>) spectra of **5b**.



*p*-Chloroaniline (**6b**):<sup>5</sup> light yellow solid, (21 mg, yield: 81%). <sup>1</sup>H NMR (500 MHz, CDCl<sub>3</sub>): δ (ppm) 7.09 (d, *J* = 8.1 Hz, 2 H), 6.60 (d, *J* = 8.1 Hz, 2 H), 3.67 (br s, 2 H). <sup>13</sup>C{H} NMR (125 MHz, CDCl<sub>3</sub>): δ (ppm) 144.9, 129.1, 123.2, 116.2.

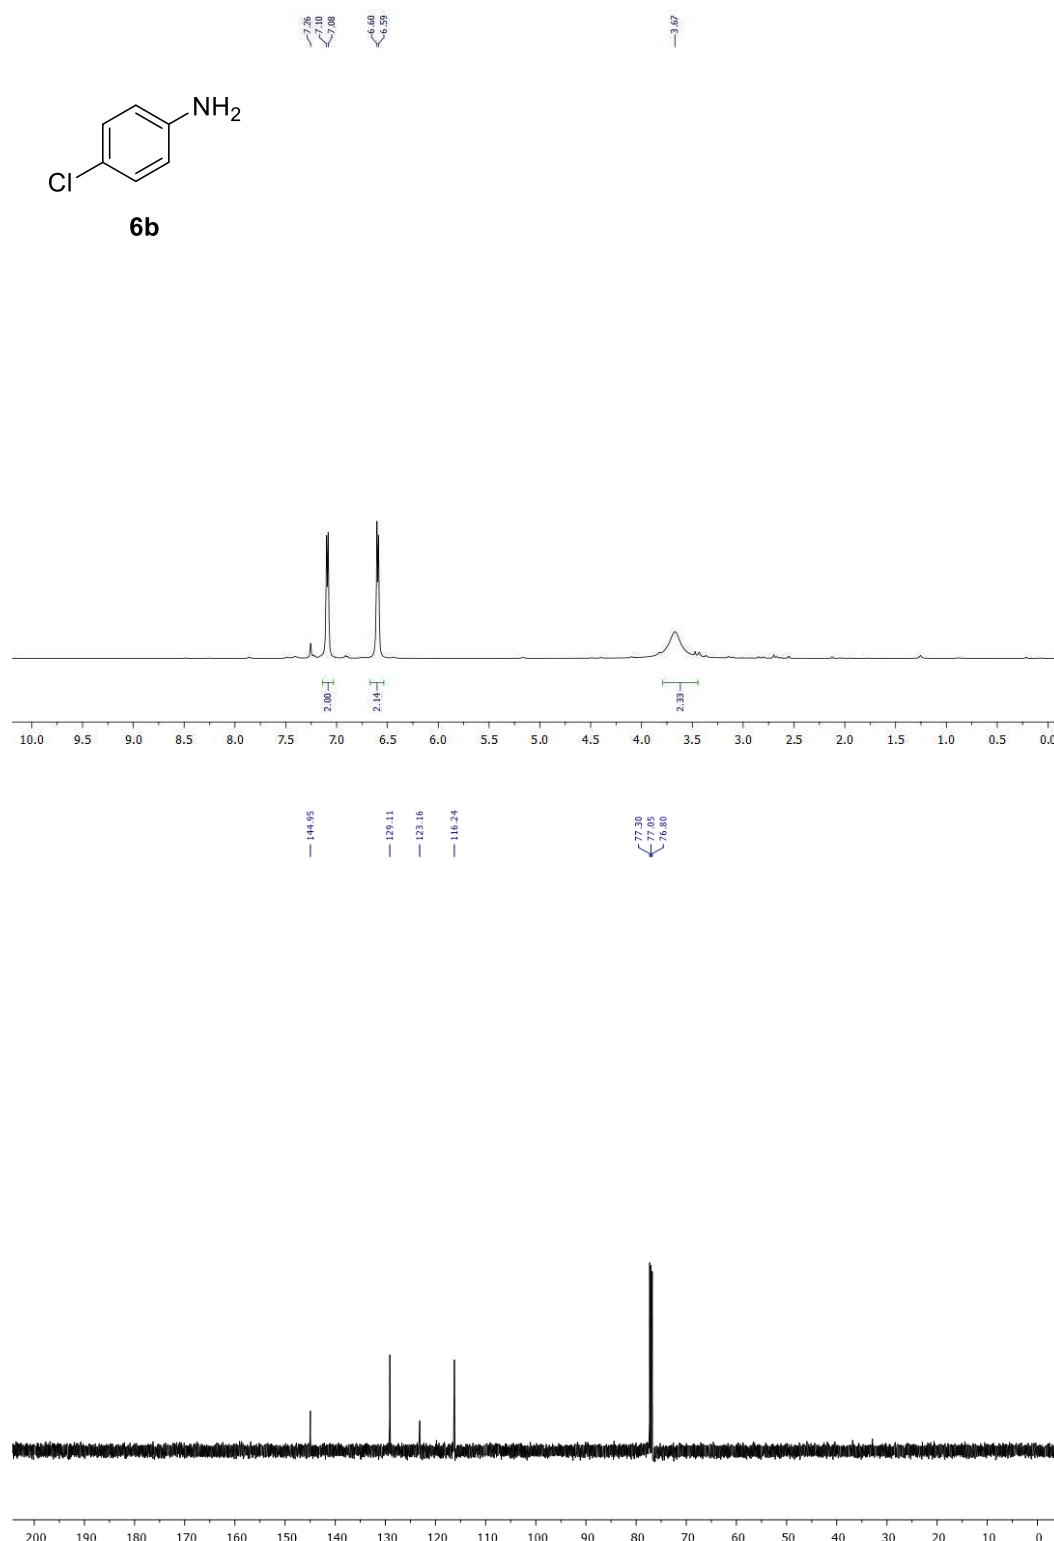

Figure S20. <sup>1</sup>H NMR (500 MHz, CDCl<sub>3</sub>) and <sup>13</sup>C{H} NMR (125 MHz, CDCl<sub>3</sub>) spectra of **6b**.

*p*-Bromoaniline (**7b**): [5] brown liquid, (27 mg, yield: 79%).  $^1\text{H}$  NMR (500 MHz,  $\text{CDCl}_3$ ):  $\delta$  (ppm) 7.23 (d,  $J = 7.9$  Hz, 2 H), 6.56 (d,  $J = 7.9$  Hz, 2 H),  $^{13}\text{C}\{\text{H}\}$  NMR (125 MHz,  $\text{CDCl}_3$ ): 145.4, 132.0, 116.7, 110.2.

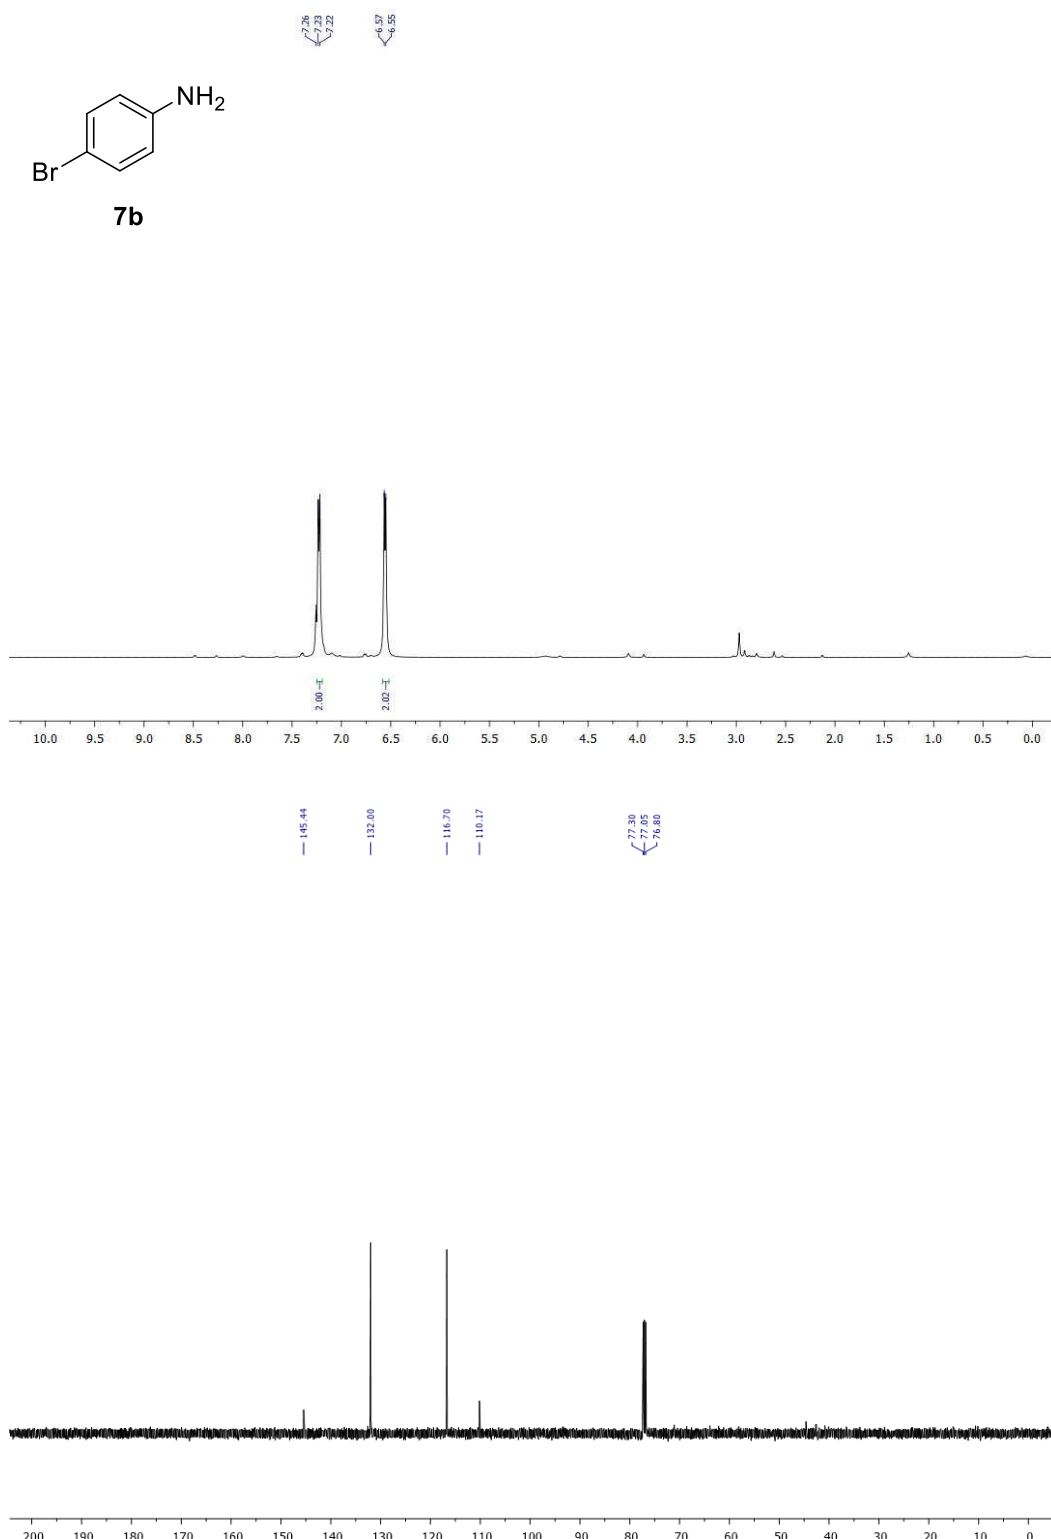

Figure S21.  $^1\text{H}$  NMR (500 MHz,  $\text{CDCl}_3$ ) and  $^{13}\text{C}\{\text{H}\}$  NMR (125 MHz,  $\text{CDCl}_3$ ) spectra of **7b**.

*Methyl 4-aminobenzoate (8b)*:<sup>5</sup> light yellow solid, (23 mg, yield: 77%). <sup>1</sup>H NMR (500 MHz, CDCl<sub>3</sub>): δ (ppm) 7.85 (d, *J* = 8.5 Hz, 2 H), 6.63 (d, *J* = 8.5 Hz, 2 H), 4.05 (br s, 2 H), 3.85 (s, 3 H). <sup>13</sup>C{H} NMR (125 MHz, CDCl<sub>3</sub>): δ (ppm) 167.2, 150.9, 131.6, 119.6, 113.8, 51.6.

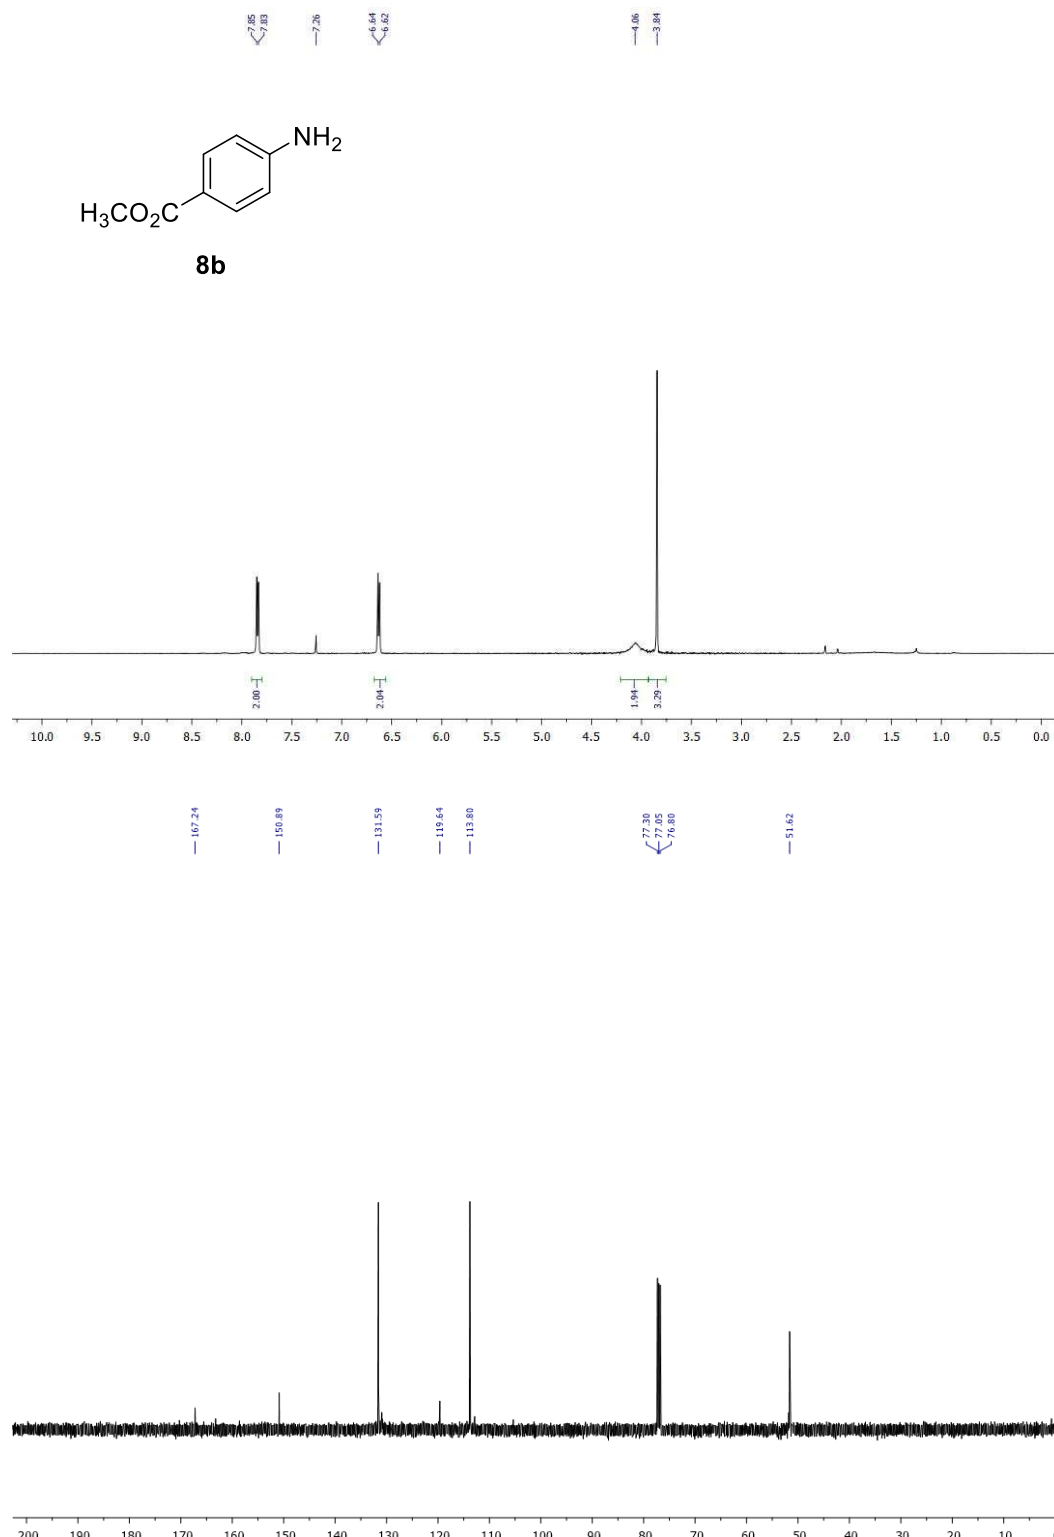

Figure S22. <sup>1</sup>H NMR (500 MHz, CDCl<sub>3</sub>) and <sup>13</sup>C{H} NMR (125 MHz, CDCl<sub>3</sub>) spectra of **8b**.

1-(4-aminophenyl)ethan-1-one (**9b**):<sup>5</sup> yellow solid, (21 mg, yield: 75%). <sup>1</sup>H NMR (500 MHz, CDCl<sub>3</sub>): δ (ppm) 7.80 (d, *J* = 8.2 Hz, 2 H), 6.66 (d, *J* = 8.0 Hz, 2 H), 2.50 (s, 3 H). <sup>13</sup>C{H} NMR (125 MHz, CDCl<sub>3</sub>): δ (ppm) 196.5, 150.8, 130.8, 113.9, 26.1.

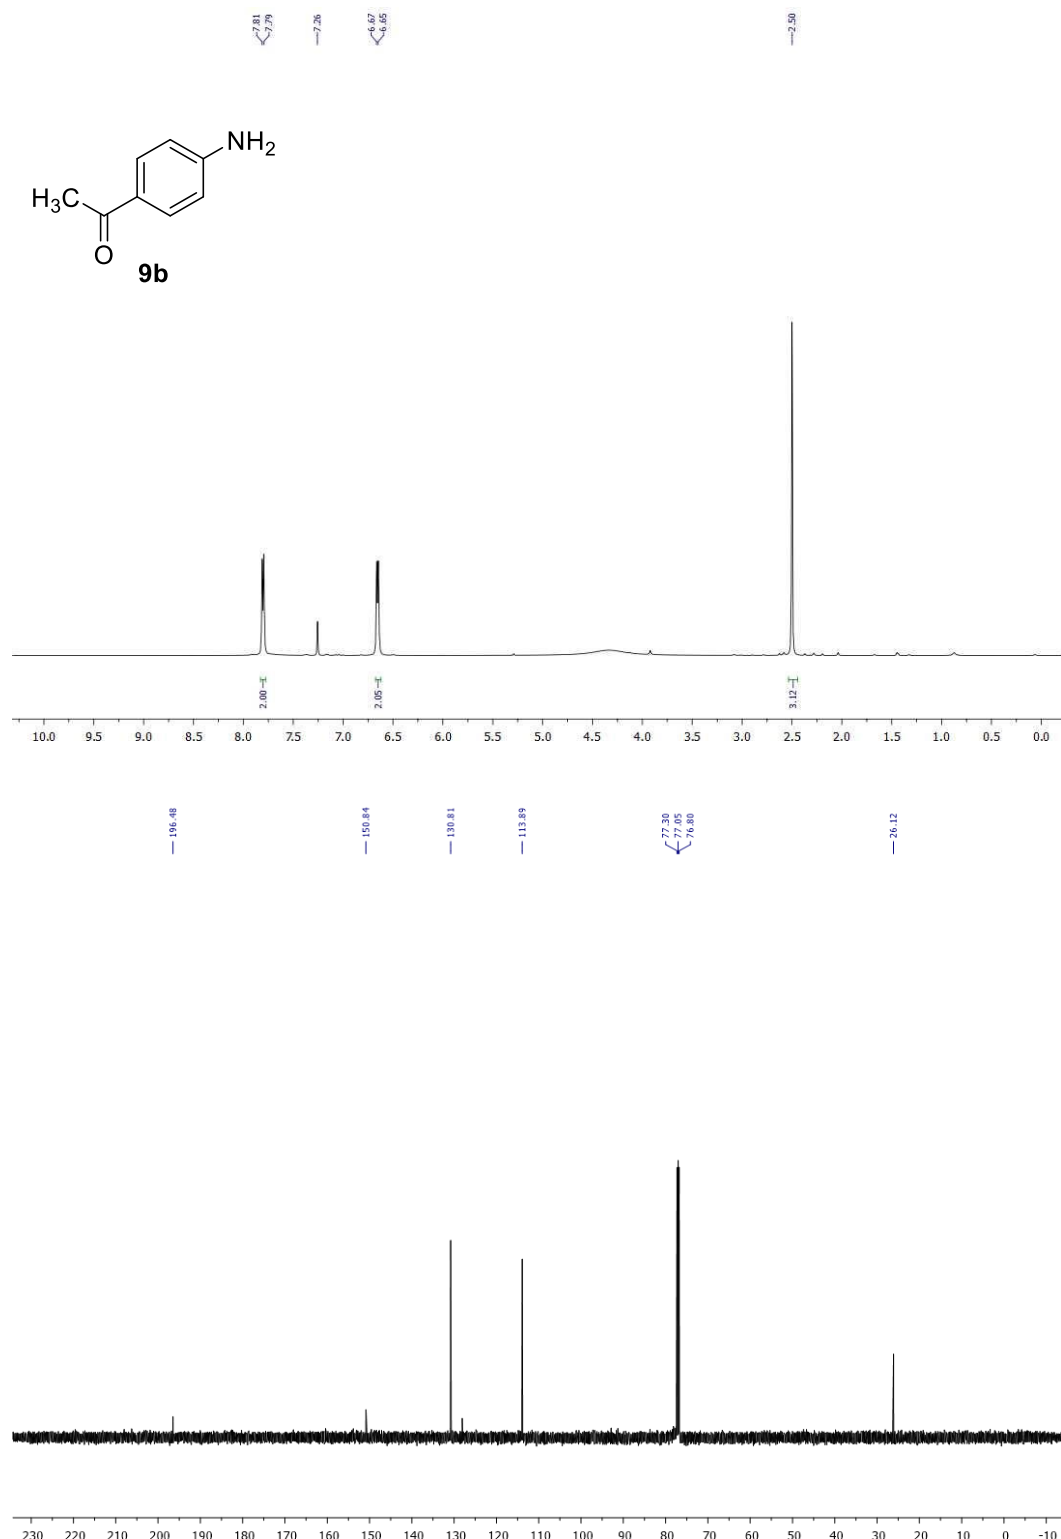

Figure S23. <sup>1</sup>H NMR (500 MHz, CDCl<sub>3</sub>) and <sup>13</sup>C{H} NMR (125 MHz, CDCl<sub>3</sub>) spectra of **9b**.

*m*-aminobenzonitrile (**10b**):<sup>5</sup> brown solid, (18 mg, yield: 75%). <sup>1</sup>H NMR (500 MHz, CDCl<sub>3</sub>): δ (ppm) 7.21 (t, *J* = 7.8 Hz, 1 H), 7.00 (d, *J* = 7.8 Hz, 1 H), 6.89 (s, 1 H), 6.86 (d, *J* = 8.9 Hz, 1 H), 3.92 (br s, 2 H). <sup>13</sup>C{H} NMR (125 MHz, CDCl<sub>3</sub>): δ (ppm) 146.9, 130.0, 121.9, 119.2 (2C), 117.4, 112.9.

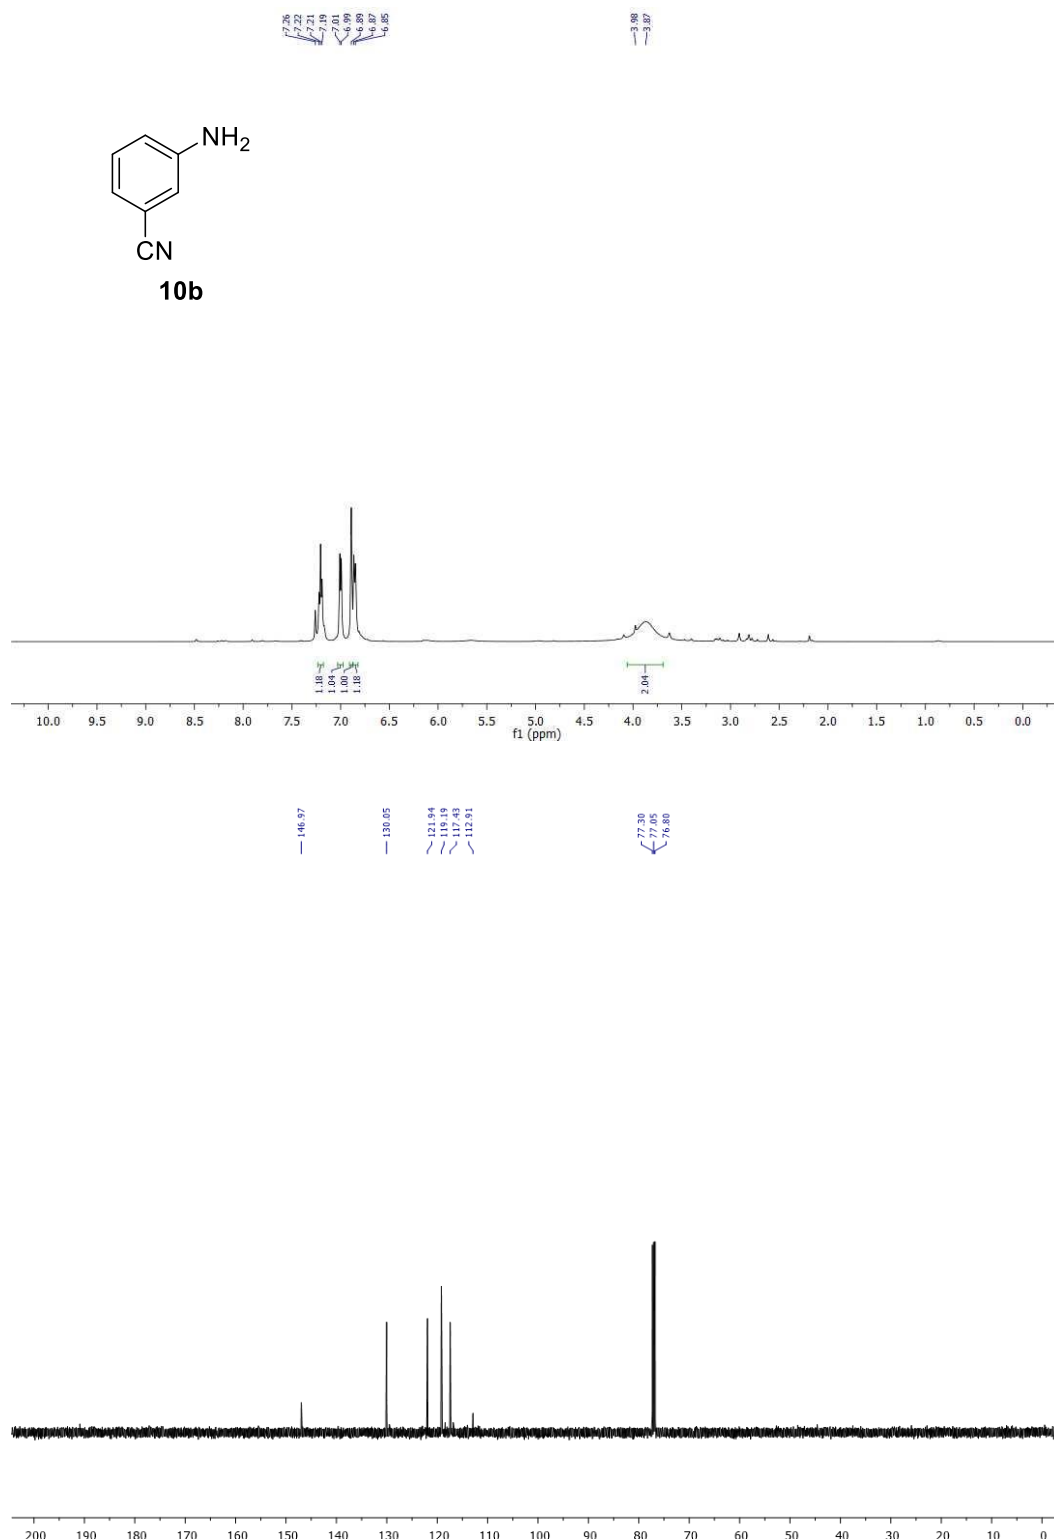

Figure S24. <sup>1</sup>H NMR (500 MHz, CDCl<sub>3</sub>) and <sup>13</sup>C{H} NMR (125 MHz, CDCl<sub>3</sub>) spectra of **10b**.

*3-aminobenzenesulfonamide (11b)*:<sup>5</sup> yellow solid, (27 mg, yield: 78%). <sup>1</sup>H NMR (500 MHz, CD<sub>3</sub>OD): δ (ppm) 7.24 (d, *J* = 7.8 Hz, 1 H), 7.22 (s, 1 H), 7.18 (d, *J* = 7.5 Hz, 1 H), 6.89 (d, *J* = 7.8 Hz, 1 H). <sup>13</sup>C{H} NMR (125 MHz, CD<sub>3</sub>OD): 149.8, 145.2, 130.6, 119.3, 115.5, 112.7.

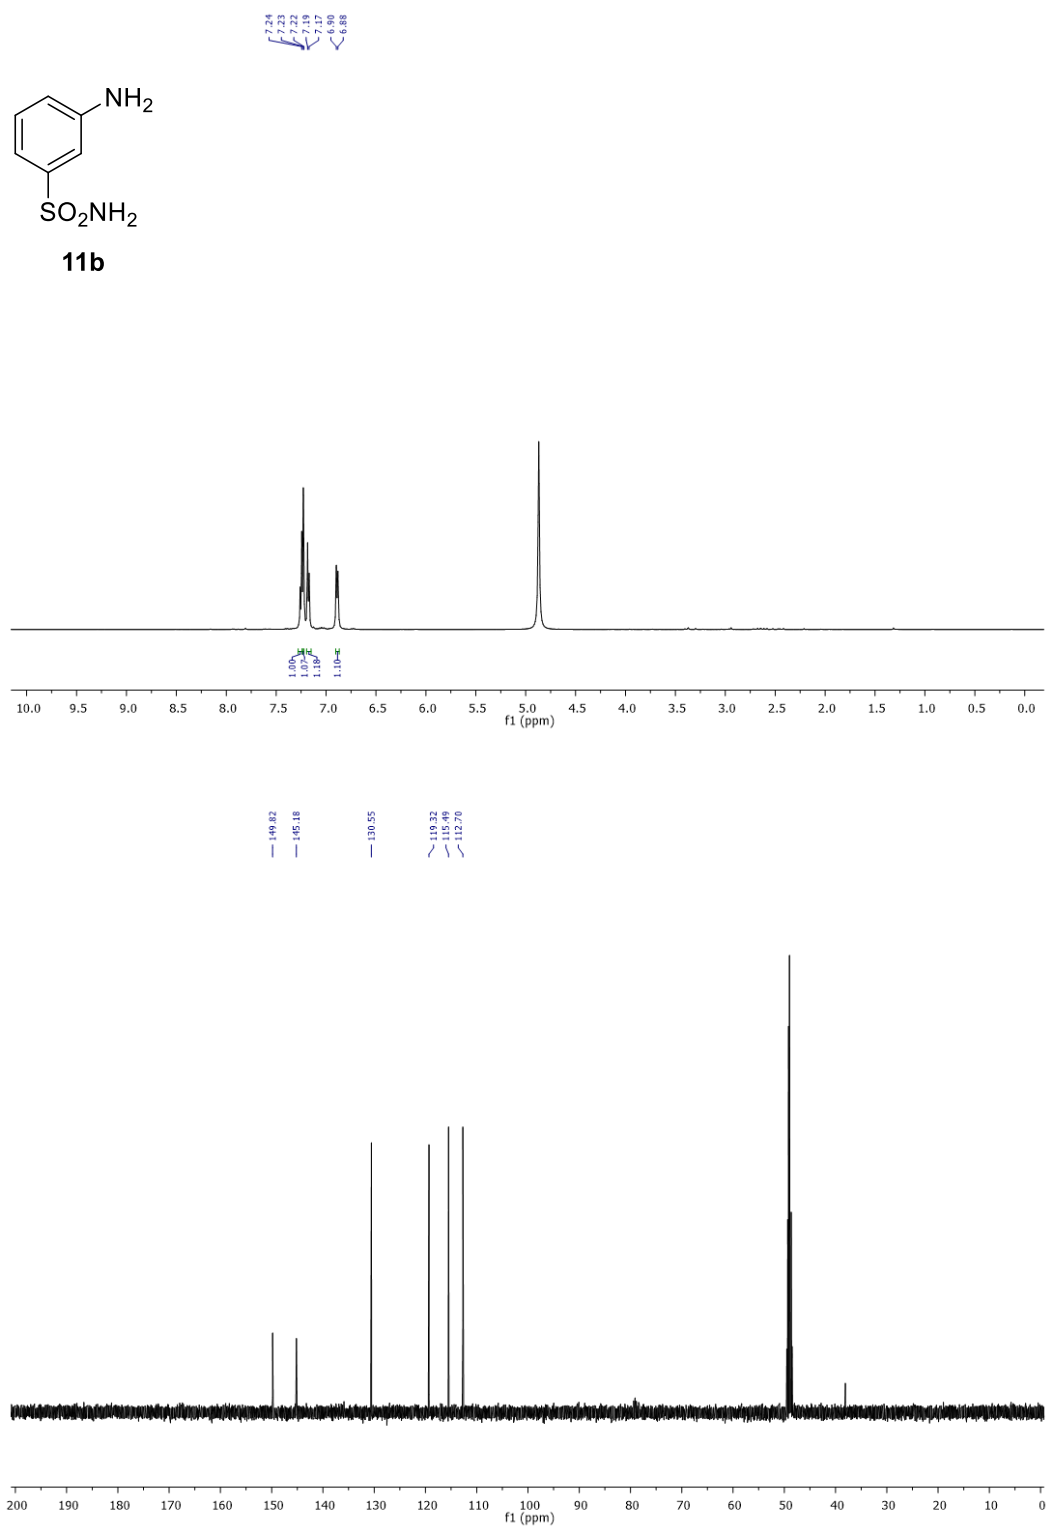

Figure S25. <sup>1</sup>H NMR (500 MHz, CD<sub>3</sub>OD) and <sup>13</sup>C{H} NMR (125 MHz, CD<sub>3</sub>OD) spectra of **11b**.

6-aminoisobenzofuran-1(3H)-one (**12b**):<sup>5</sup> yellow solid, (25 mg, yield: 83%). <sup>1</sup>H NMR (500 MHz, CD<sub>3</sub>OD): δ (ppm) 7.29 (d, *J* = 7.8 Hz, 1 H), 7.08-7.05 (m, 2 H), 5.22 (s, 2 H). <sup>13</sup>C{<sup>1</sup>H} NMR (125 MHz, CD<sub>3</sub>OD): δ (ppm) 172.8, 149.3, 135.9, 125.9, 122.4, 121.8, 108.3, 69.9.

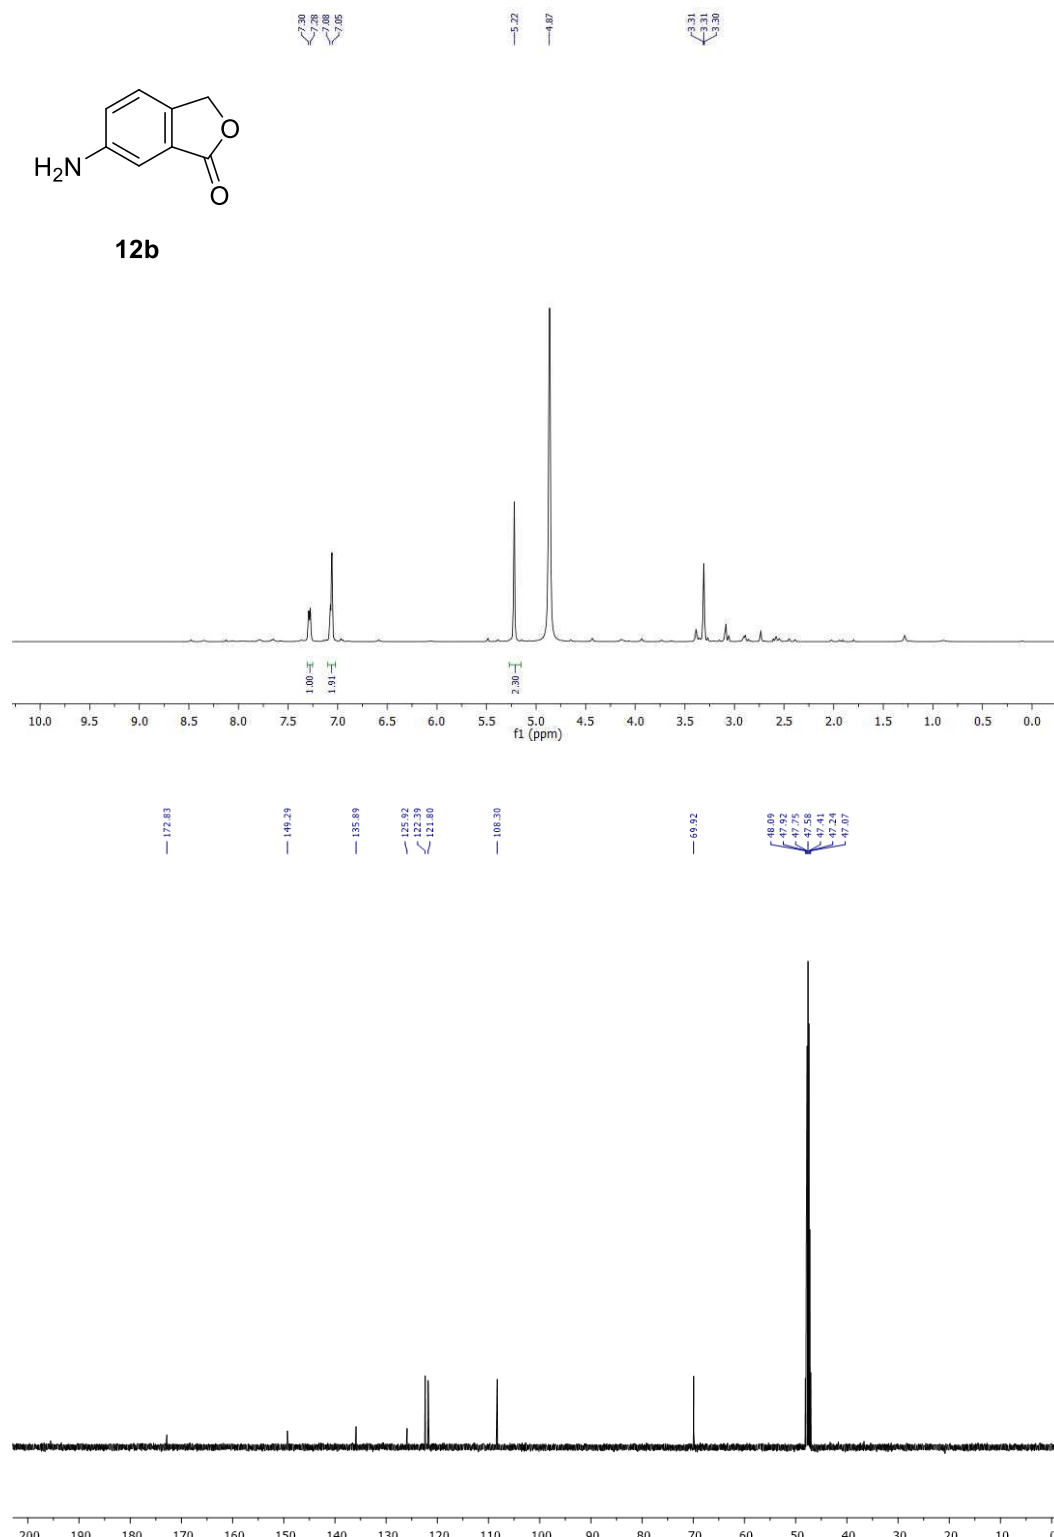

Figure S26. <sup>1</sup>H NMR (500 MHz, CD<sub>3</sub>OD) and <sup>13</sup>C{<sup>1</sup>H} NMR (125 MHz, CD<sub>3</sub>OD) spectra of **12b**.

*1H*-benzo[d]imidazol-5-amine (**13b**):<sup>5</sup> brown solid, (22 mg, yield: 81%). <sup>1</sup>H NMR (500 MHz, CD<sub>3</sub>OD): δ (ppm) 8.00 (s, 1 H), 7.37 (d, *J* = 9.0 Hz, 1 H), 6.93 (s, 1 H), 6.77 (d, *J* = 8.2 Hz, 1 H). <sup>13</sup>C{H} NMR (125 MHz, CD<sub>3</sub>OD): δ (ppm) 144.9, 140.9, 139.7, 117.2, 114.8, 100.4.

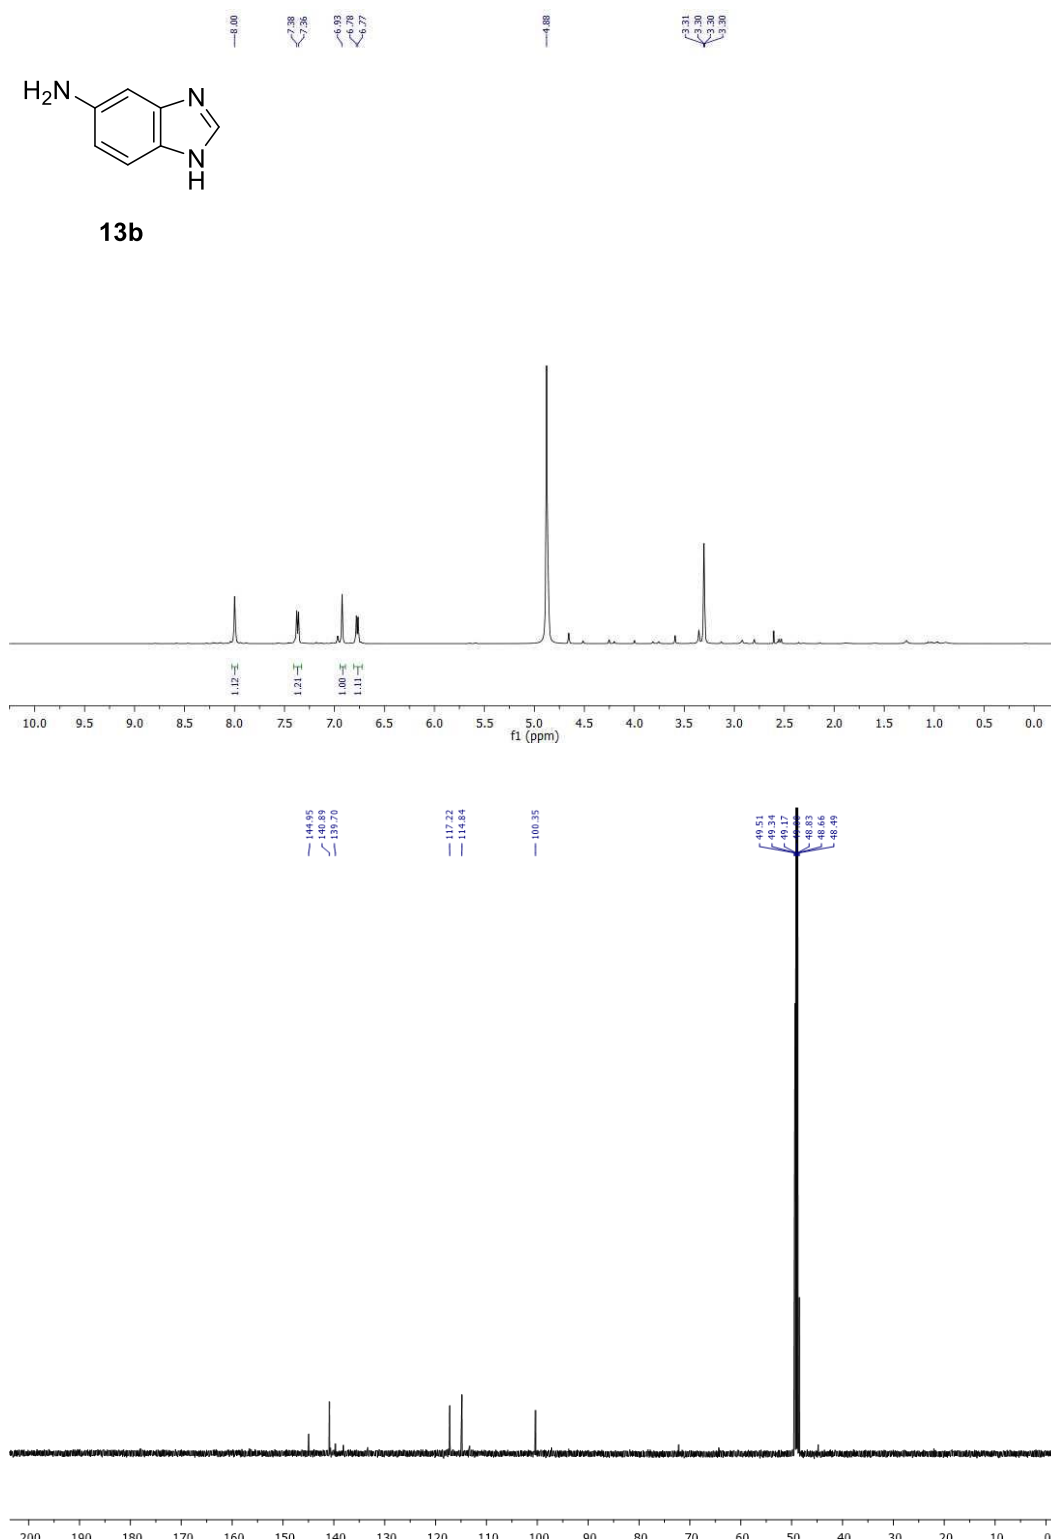

Figure S27. <sup>1</sup>H NMR (500 MHz, CD<sub>3</sub>OD) and <sup>13</sup>C{H} NMR (125 MHz, CD<sub>3</sub>OD) spectra of **13b**.



*1H*-indazol-5-amine (**14b**):<sup>5</sup> yellow liquid, (21 mg, yield: 79%). <sup>1</sup>H NMR (500 MHz, CD<sub>3</sub>OD): δ (ppm) 7.79 (s, 1 H), 7.46 (d, *J* = 8.6 Hz, 1 H), 6.70 (s, 1 H), 6.64 (dd, *J* = 8.6, 1.8 Hz, 1 H). <sup>13</sup>C{<sup>1</sup>H} NMR (125 MHz, CD<sub>3</sub>OD): δ (ppm) 148.7, 143.5, 134.6, 122.2, 117.9, 114.6, 93.3.

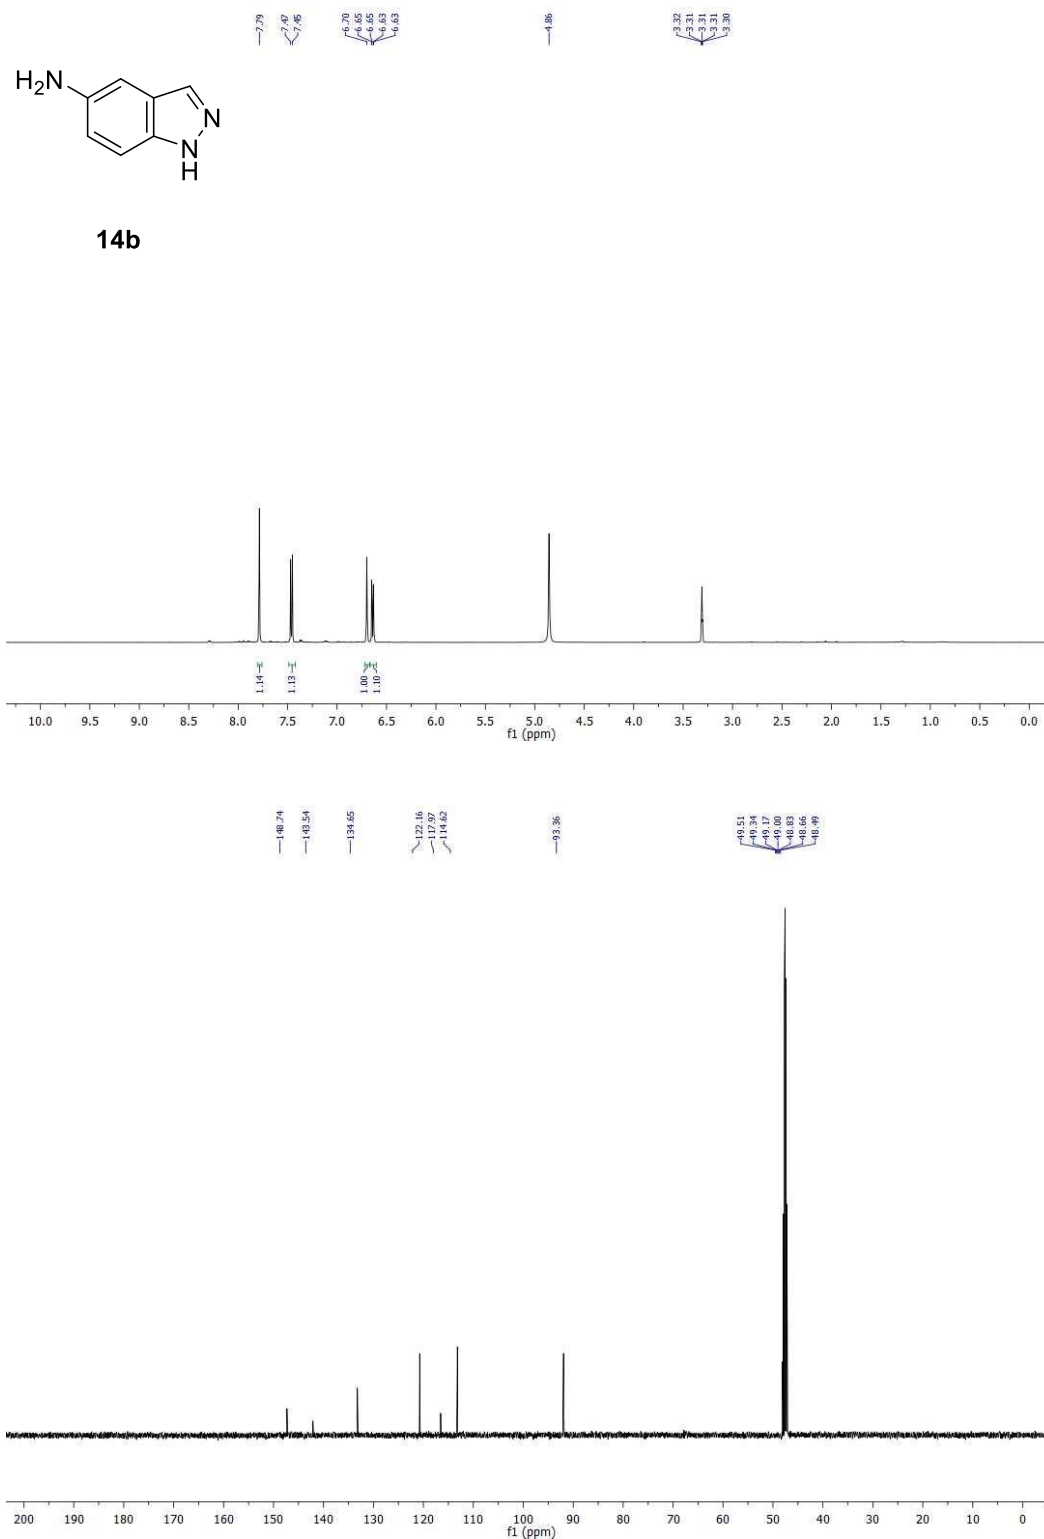

Figure S28. <sup>1</sup>H NMR (500 MHz, CD<sub>3</sub>OD) and <sup>13</sup>C{<sup>1</sup>H} NMR (125 MHz, CD<sub>3</sub>OD) spectra of **14b**.

*methyl (E)-3-(4-aminophenyl)acrylate (16b)*:<sup>8</sup> yellow solid, (24 mg, yield: 68%). <sup>1</sup>H NMR (500 MHz, CDCl<sub>3</sub>): δ (ppm) 7.60 (d, *J* = 15.9 Hz, 1 H), 7.35 (d, *J* = 8.4 Hz, 2 H), 6.65 (d, *J* = 8.4 Hz, 2 H), 6.24 (d, *J* = 15.9 Hz, 1 H), 3.78 (s, 3 H). <sup>13</sup>C{H} NMR (125 MHz, CDCl<sub>3</sub>): δ (ppm) 168.2, 148.7, 145.2, 129.9, 124.7, 114.9, 113.3, 51.5.

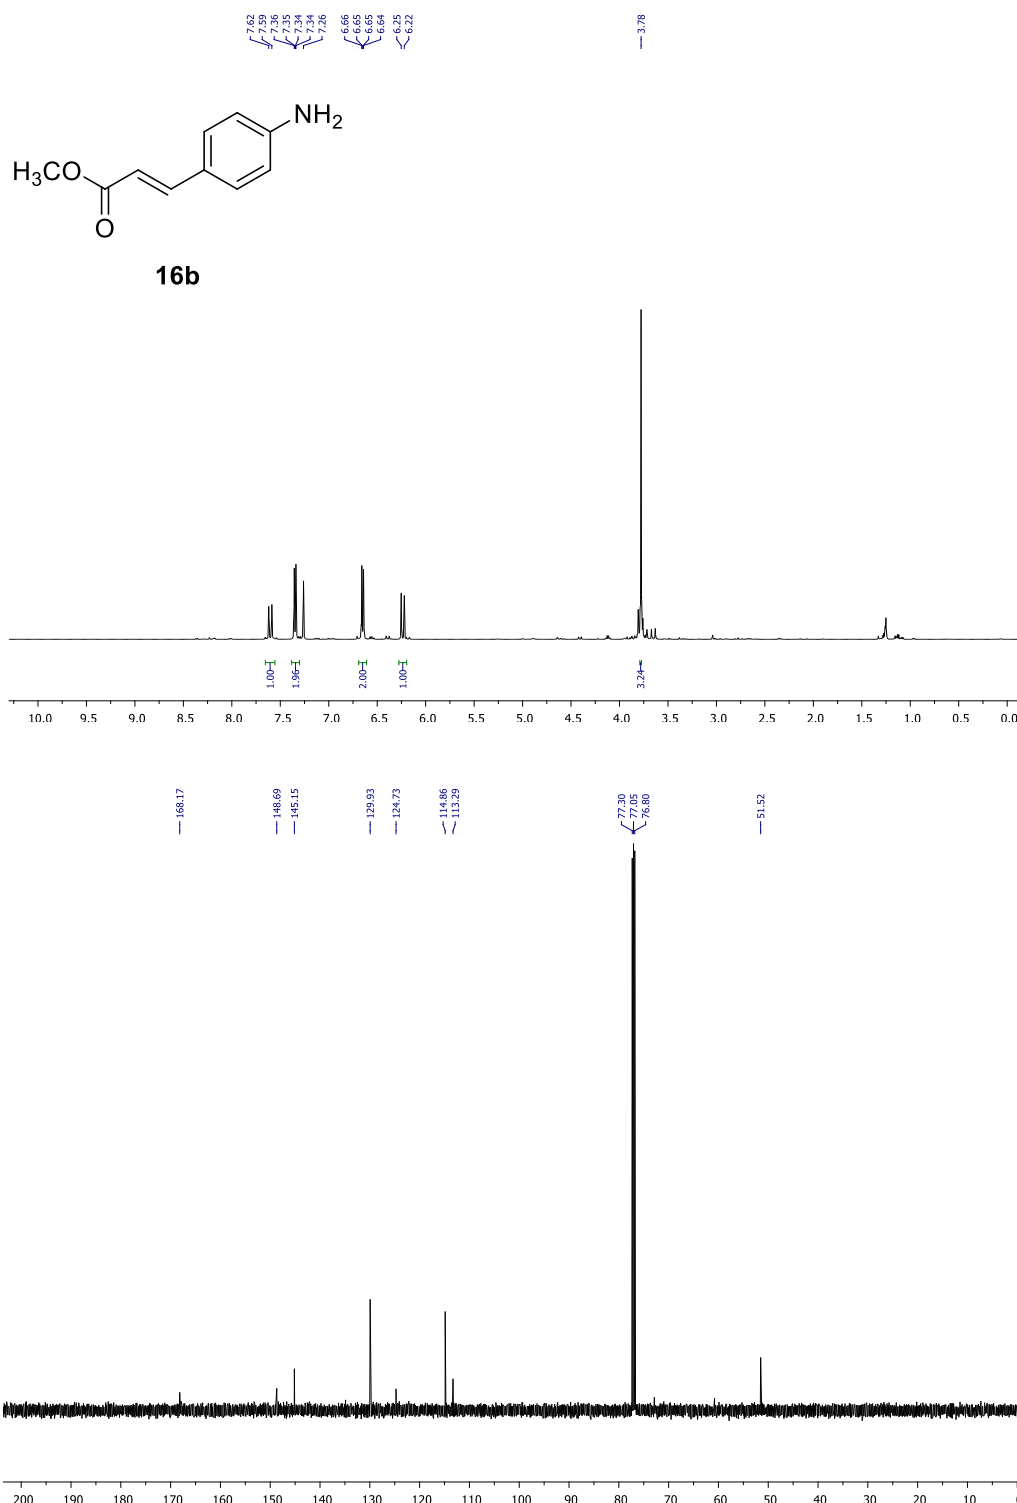

Figure S29. <sup>1</sup>H NMR (500 MHz, CDCl<sub>3</sub>) and <sup>13</sup>C{H} NMR (125 MHz, CDCl<sub>3</sub>) spectra of **16b**.

*N*-(1*H*-imidazol-2-yl)hydroxylamine (**17c**):<sup>6</sup> white solid, (16 mg, yield: 85%). <sup>1</sup>H NMR (500 MHz, CD<sub>3</sub>OD): δ (ppm) 7.10 (s, 2 H), 4.95 (br s, 1 H). <sup>13</sup>C{<sup>1</sup>H} (125 MHz, CD<sub>3</sub>OD): δ (ppm) 136.5, 131.0 (2C).

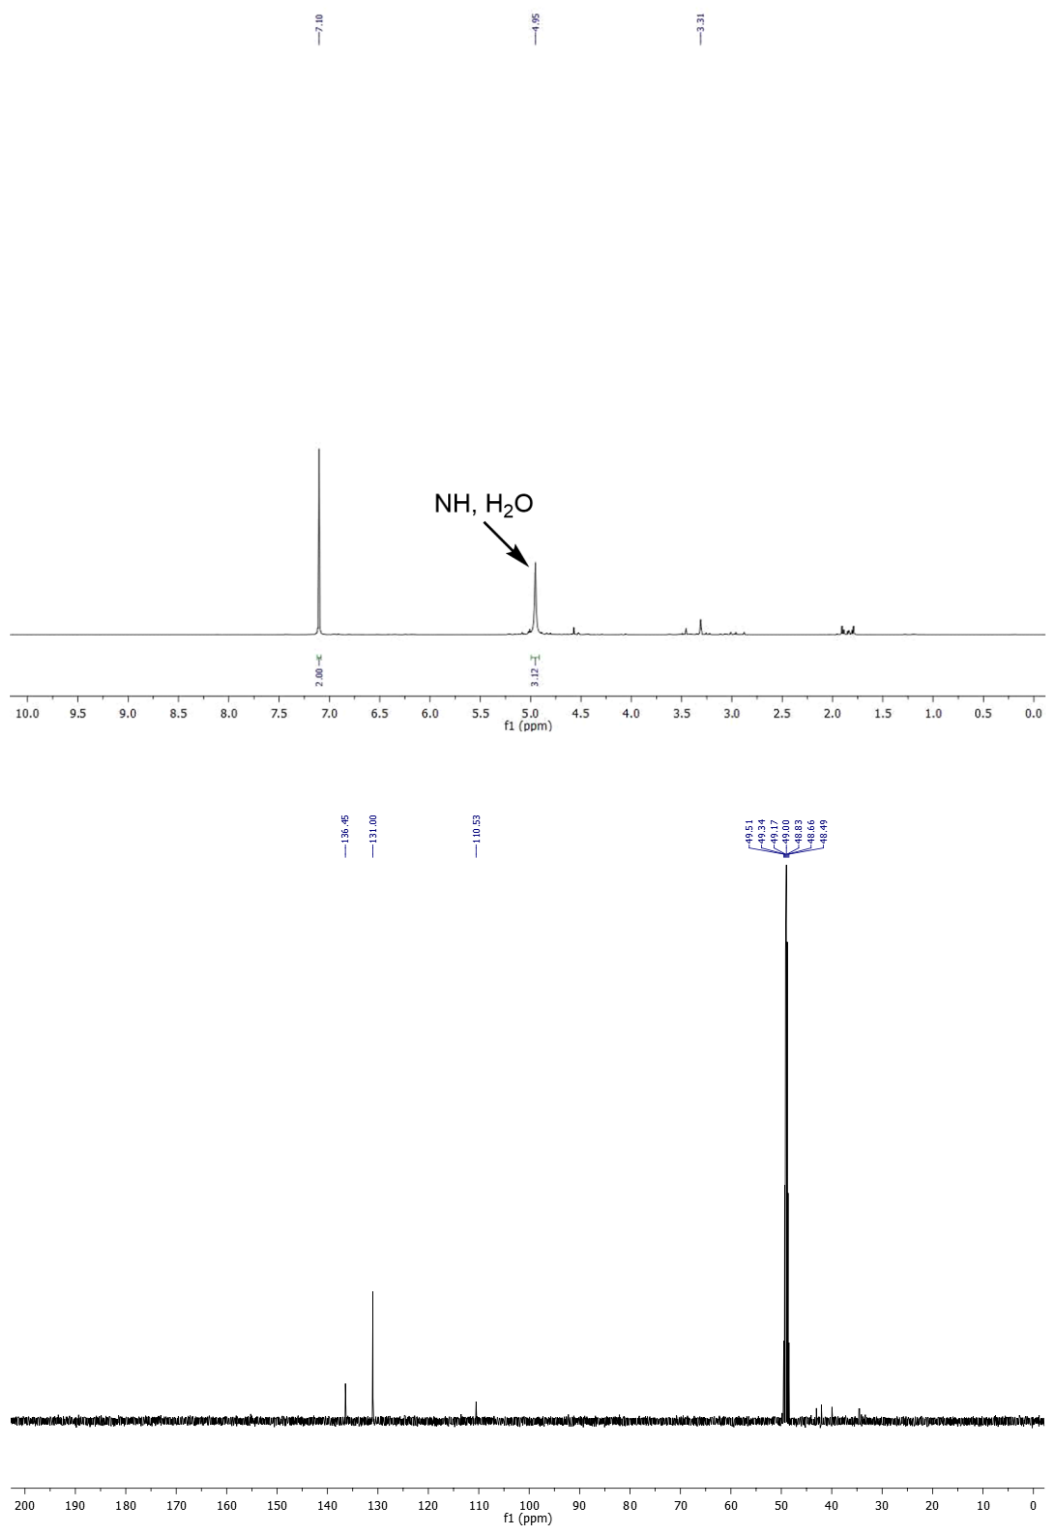

Figure S30. <sup>1</sup>H NMR (500 MHz, CD<sub>3</sub>OD) and <sup>13</sup>C{<sup>1</sup>H} NMR (125 MHz, CD<sub>3</sub>OD) spectra of **17c**.

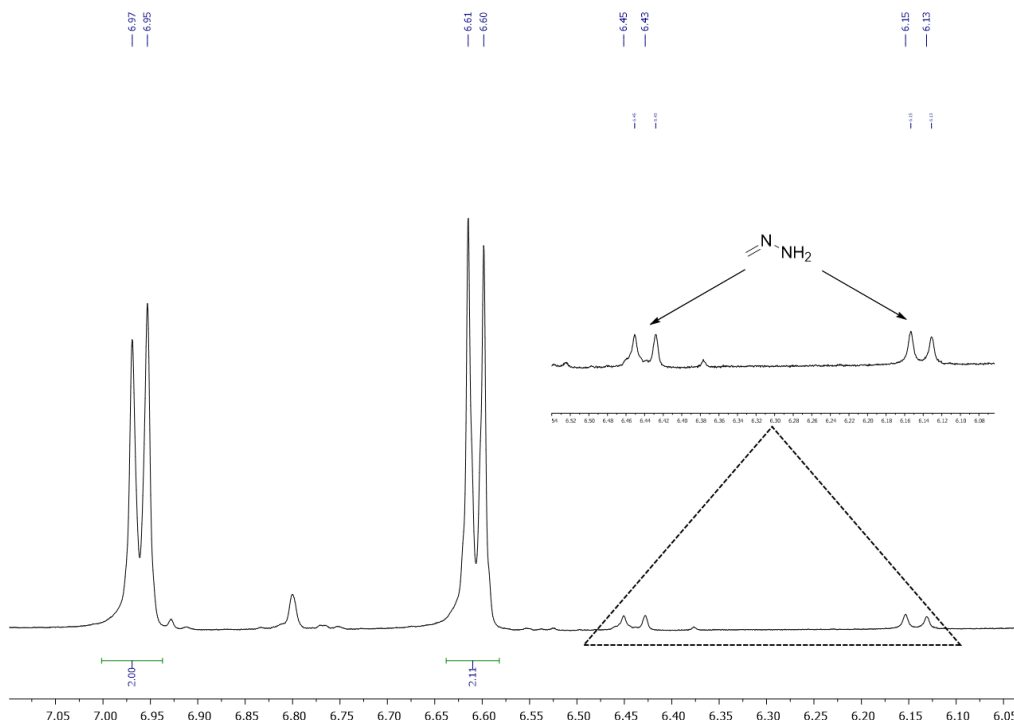

Figure S31.  $^1\text{H}$  NMR (500 MHz,  $\text{CD}_3\text{OD}$ ) of crude reaction mixture of the reduction of **1a** in the presence **2** and 1 equiv  $\text{CH}_3\text{NHNH}_2$ .

## S2.4 Mechanistic studies

### S2.4.1 High-resolution mass spectrometry

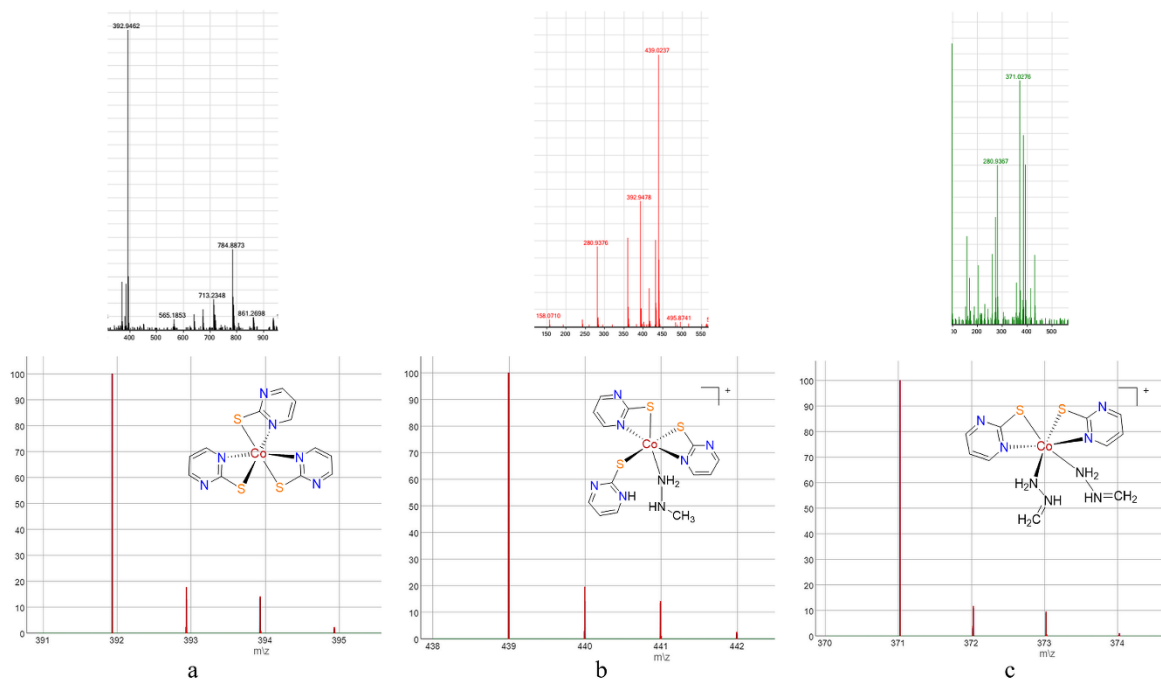

Figure S32. Upper part: High-resolution mass spectra of: (a) **1** in CH<sub>3</sub>OH, (b) **1** in CH<sub>3</sub>OH after addition of 1-2 equiv of CH<sub>3</sub>NHNH<sub>2</sub>, (c) **1** in CH<sub>3</sub>OH after addition of more than 3 equiv of CH<sub>3</sub>NHNH<sub>2</sub>. Lower part: Calculated mass spectra that correspond to the observed mass peaks  $m/z$  and their assignments to the species (a)  $[\text{Co}(\text{pymt})_3 + \text{H}]^+$ , (b)  $[\text{Co}(\text{pymt})_2(\text{pymtH})(\text{CH}_3\text{NHNH}_2)]^+$  and (c)  $[\text{Co}(\text{pymt})_2(\text{CH}_2=\text{NNH}_2)_2]^+$ .

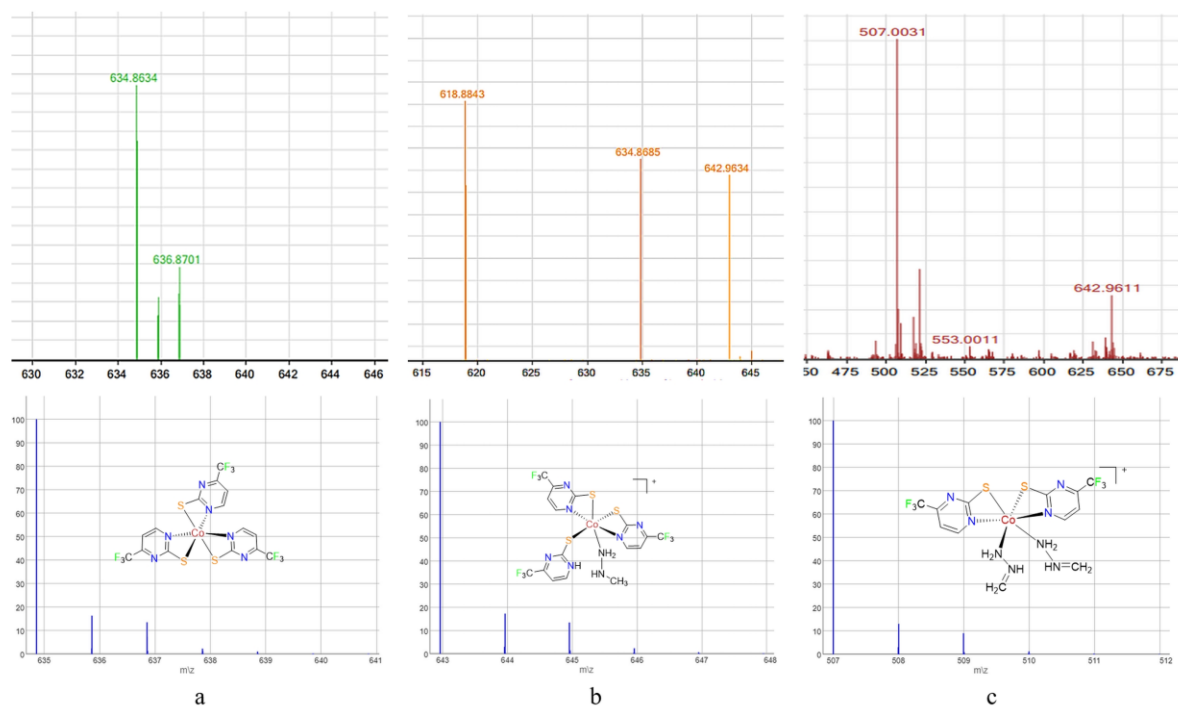

Figure S33. Upper part: High-resolution mass spectra of: (a) **2** in  $\text{CH}_3\text{OH}$ , (b) **2** in  $\text{CH}_3\text{OH}$  after addition of 1-2 equiv of  $\text{CH}_3\text{NHNH}_2$ , (c) **2** in  $\text{CH}_3\text{OH}$  after addition of more than 3 equiv of  $\text{CH}_3\text{NHNH}_2$ . Lower part: Calculated mass spectra that correspond to the observed mass peaks  $m/z$  and their assignments to the species (a)  $[\text{Co}(\text{tfmp}2\text{S})_3+\text{K}]^+$ , (b)  $[\text{Co}(\text{tfmp}2\text{S})_2(\text{tfmp}2\text{SH})(\text{CH}_3\text{NHNH}_2)]^+$  and (c)  $[\text{Co}(\text{tfmp}2\text{S})_2(\text{CH}_2=\text{NNH}_2)_2]^+$ .

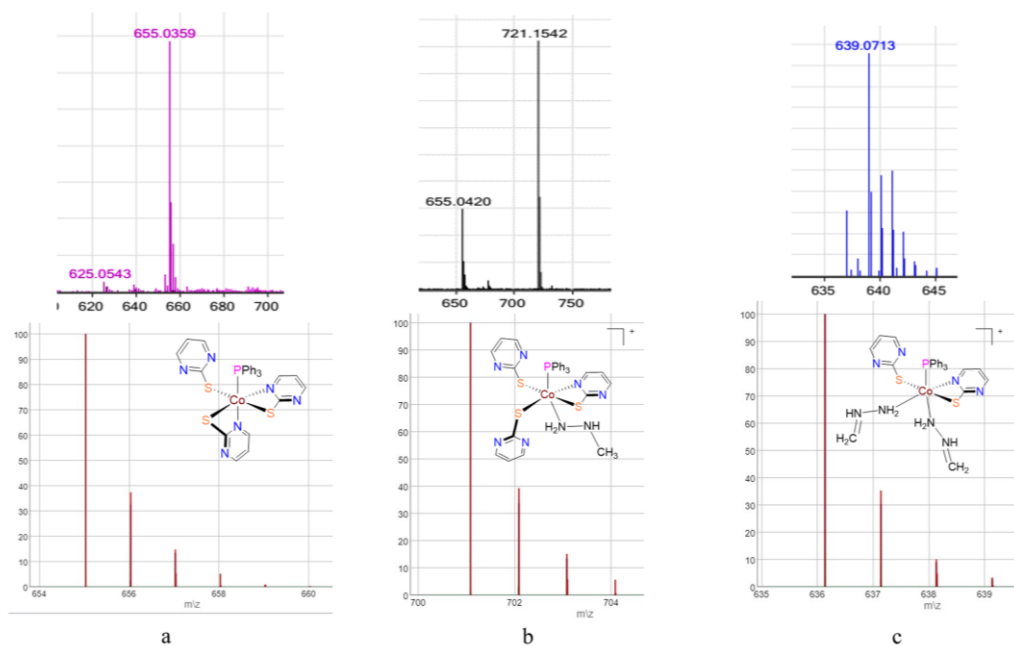

Figure S34. Upper part: High-resolution mass spectra of: (a) **5** in  $\text{CH}_3\text{OH}$ , (b) **5** in  $\text{CH}_3\text{OH}$  after addition of 1-2 equiv of  $\text{CH}_3\text{NHNH}_2$ , (c) **5** in  $\text{CH}_3\text{OH}$  after addition of more than 3 equiv of  $\text{CH}_3\text{NHNH}_2$ . Lower part: Calculated mass spectra that correspond to the observed mass peaks  $m/z$  and their assignments to the species (a)  $[\text{Co}(\text{pymt})_3(\text{PPh}_3)]^+$ , (b)  $[\text{Co}(\text{pymt})_2(\text{pymtH})(\text{PPh}_3)(\text{CH}_3\text{NHNH}_2)+\text{K}]^+$  and (c)  $[\text{Co}(\text{pymt})_2(\text{pymtH})(\text{PPh}_3)(\text{CH}_2=\text{NNH}_2)_2]^+$ .

## S2.4.2 UV-vis absorption spectroscopy

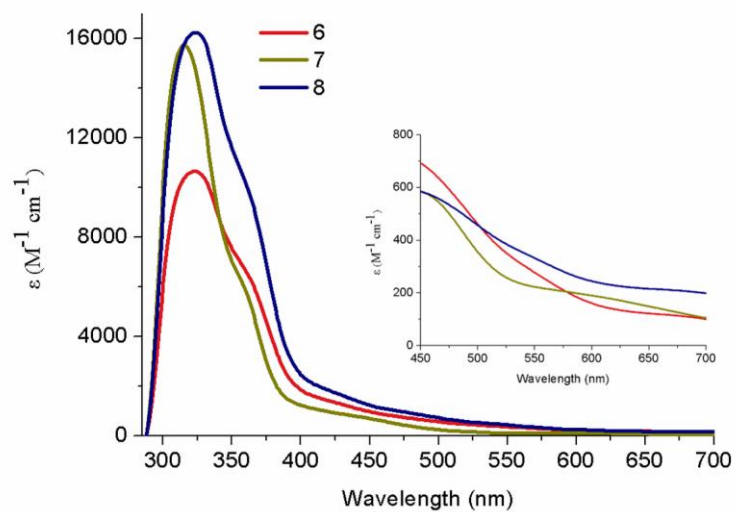

Figure S35. UV-vis absorption spectra of **6-8** in CH<sub>3</sub>OH ( $2 \times 10^{-4}$  M). Inset: UV-vis absorption spectra of the lower energy region of **6-8** in CH<sub>3</sub>OH ( $3 \times 10^{-3}$  M).

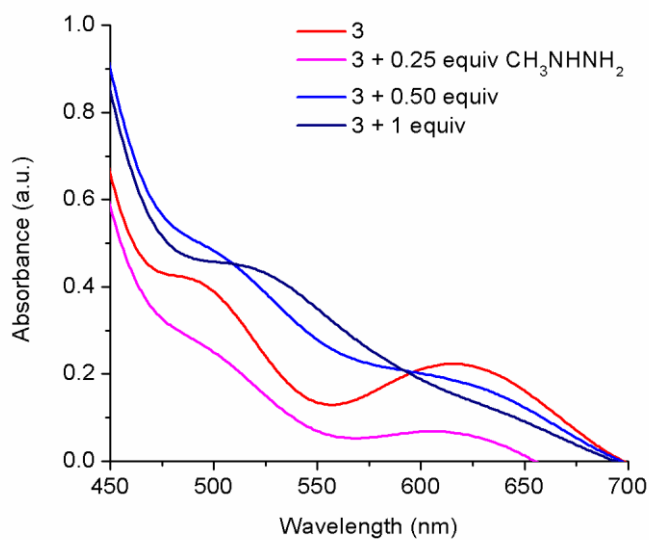

Figure S36. UV-vis absorption spectra of **3** in CH<sub>3</sub>OH ( $3 \times 10^{-3}$  M) upon addition of increasing amounts (0.25-1 equiv) of CH<sub>3</sub>NHNH<sub>2</sub>.



### S2.4.3 Cyclic voltammetry

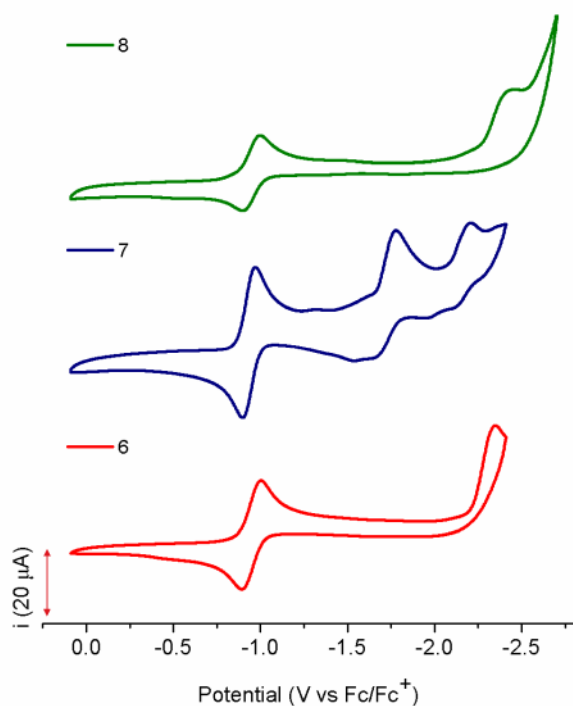

Figure S37. Cyclic voltammetry data for the pyridine-based thioamidato Co(III) complexes **6-8** in CH<sub>3</sub>CN (all spectra were shifted vertically for the sake of clarity).

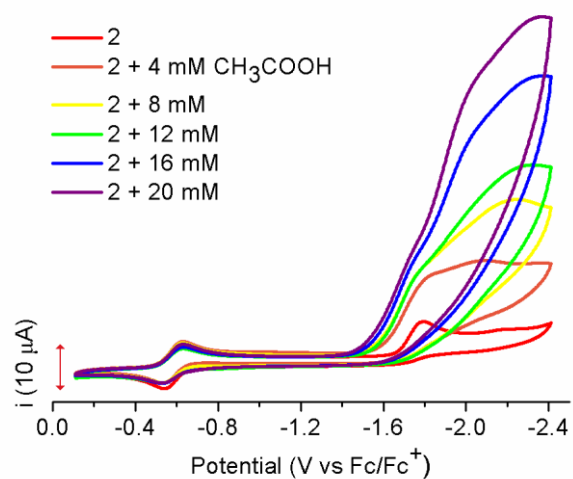

Figure S38. Cyclic voltammetry data of **2** in CH<sub>3</sub>CN upon addition of increasing amounts of CH<sub>3</sub>COOH.

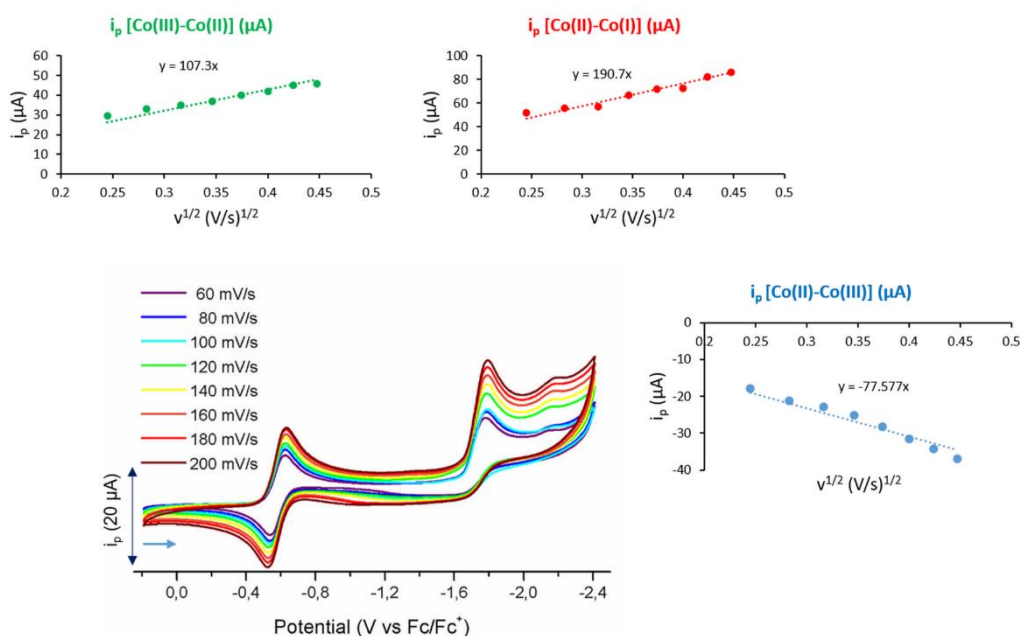

Figure S39. Left side: Overlay of cyclic voltammograms of **2** in CH<sub>3</sub>CN at different scan rates from 60 to 200 mV. Top and right side: Peak current ( $I_p$ ) vs square roots of the scan rates ( $v^{1/2}$ ) plots for the Co(III)/Co(II), Co(II)/Co(I) and Co(II)/Co(III) redox processes.

CV measurements of **2** at different scan rates show that the peak currents ( $I_p$ ) associated with both reduction processes vary linearly with the square root of the scan rates and follow the Randles-Sevcik diffusion equation,  $I_p = 0.4463(F/RT)^{1/2}n_p^{3/2}FAD^{1/2}[C_o]v^{1/2}$ , where  $I_p$  is the peak current,  $F$  is Faraday's constant ( $F = 96.485 \text{ C mol}^{-1}$ ),  $R$  is the universal gas constant ( $R = 8.314 \text{ J K}^{-1} \text{ mol}^{-1}$ ),  $T$  is temperature ( $T = 300 \text{ K}$ ),  $n_p$  is the number of electrons transferred,  $A$  is the active surface area of the electrode,  $D$  is the diffusion coefficient of the complex,  $[C_o]$  is the concentration of the catalyst, and  $v$  is the scan rate (V/s). The electrochemical diffusion coefficients of **2** were determined to be  $8.5 \times 10^{-6}$ ,  $22.5 \times 10^{-6} \text{ cm}^2 \text{ s}^{-1}$  for the first and the second reduction processes, respectively (the diffusion coefficients are mentioned in anodic scan). The observation of similar slopes in the  $I_p$  vs  $v^{1/2}$  plots for both of these processes provides an indication of the homogeneous behavior of the complex during its reduction from Co(III) to Co(I), and not the formation of nanoparticles.

## S2.4.4 Gas chromatography analysis

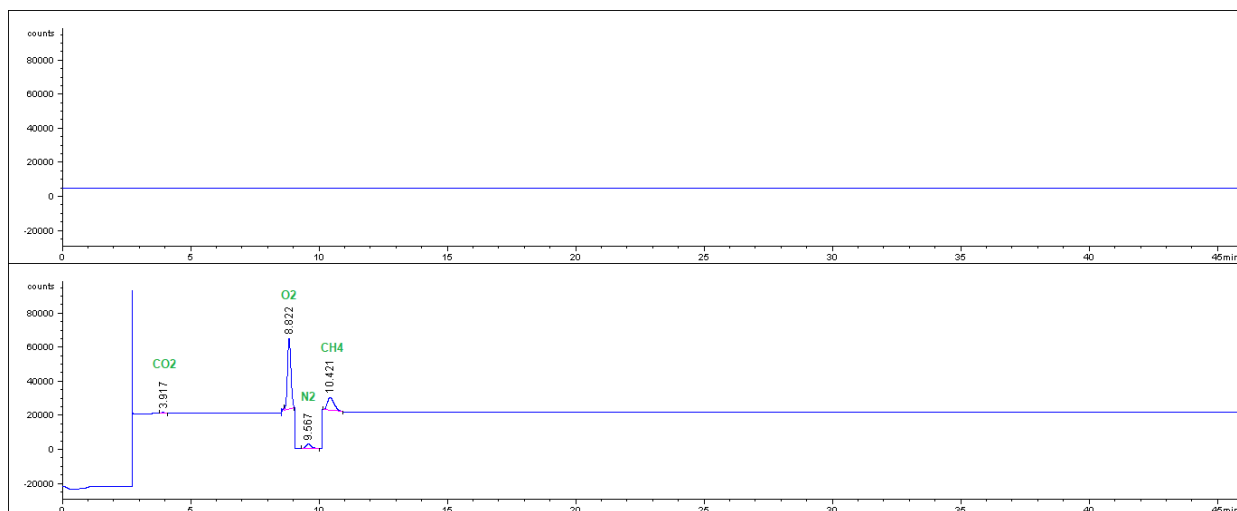

Figure S40. GC-TCD chromatogram of the reaction mixture in the presence of **2** and  $\text{CH}_3\text{NHNH}_2$  in  $\text{CH}_3\text{OH}$  ( $\text{CH}_4$ : 2.9%,  $\text{N}_2$ : 8.6%).

## REFERENCES

---

- 1 Bruker Analytical X-ray Systems, Inc., 2006. Apex2, Version 2 User Manual, M86-E01078, Madison, WI.
- 2 P. W. Betteridge, J. R. Carruthers, R. I. Cooper, K. Prout, D. J. Watkin, Software for guided crystal structure analysis, *J. Appl. Cryst.*, 2003, **36**, 1487.
- 3 C. F. Macrae, P. R. Edgington, P. McCabe, E. Pidcock, G. P. Shields, R. Taylor, M. Towler, J. van de Streek, Mercury: visualization and analysis of crystal structures, *J. Appl. Cryst.*, 2006, **39**, 453-457.
- 4 E. Vasilikogiannaki, C. Gryparis, V. Kotzabasaki, I. N. Lykakis, M. Stratakis, *Adv. Synth. Catal.*, 2013, **355**, 907-911.
- 5 D. I. Ioannou, D. K. Gioftsidou, V. E. Tsina, M. G. Kallitsakis, A. G. Hatzidimitriou, M. A. Terzidis, P. A. Angaridis, I. N. Lykakis, *J. Org. Chem.*, 2021, **86**, 2895-2906.
- 6 M. G. Kallitsakis, D. I. Ioannou, M. A. Terzidis, G. E. Kostakis, I. N. Lykakis, *Org. Lett.*, 2020, **22**, 4339-4343.
- 7 Y. Y. See, M. S. Sanford, *Org. Lett.*, 2020, **22**, 2931-2934.
- 8 F. Hochberger-Roa, S. Cortés-Mendoza, D. Gallardo-Rosas, R. A. Toscano, M. C. Ortega-Alfaro, J. G. López-Cortés, *Adv. Synth. Catal.*, 2019, **361**, 4055-4064.
